# Supplementary material
Source: PubMed Central journal article supplement (PMC4169915)

# Mouse Keratinocytes

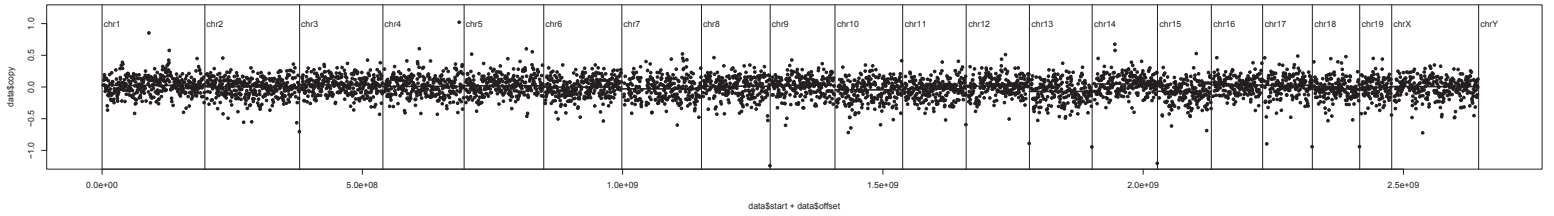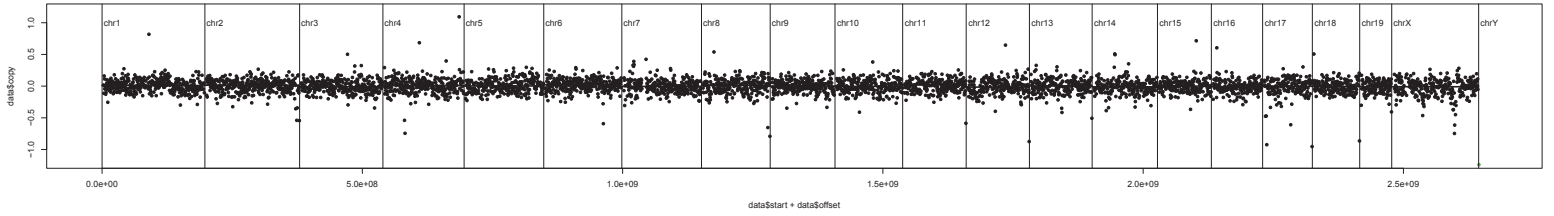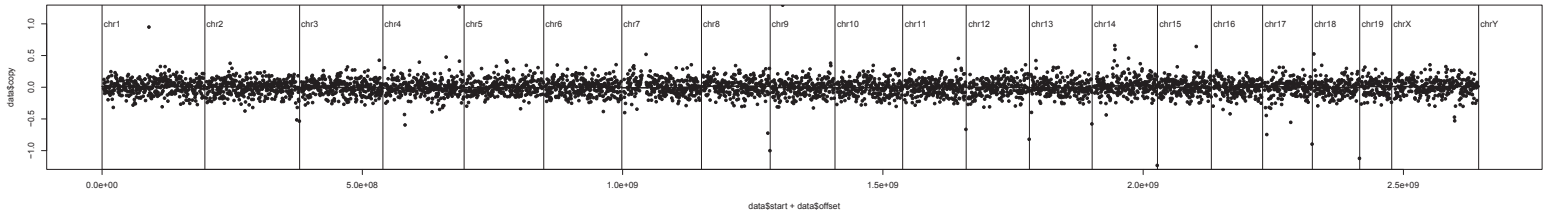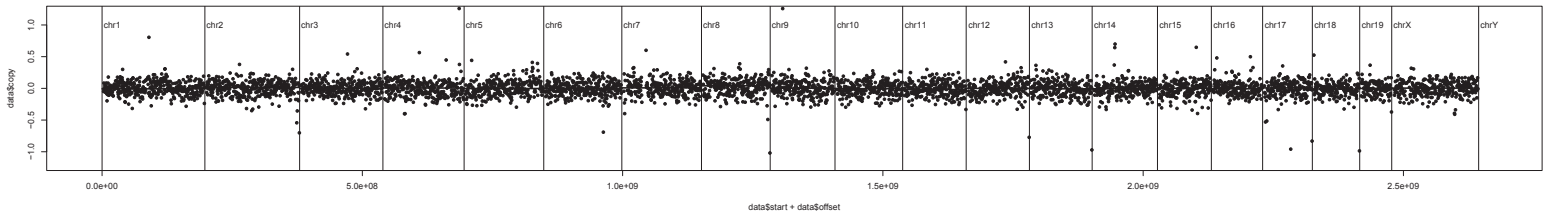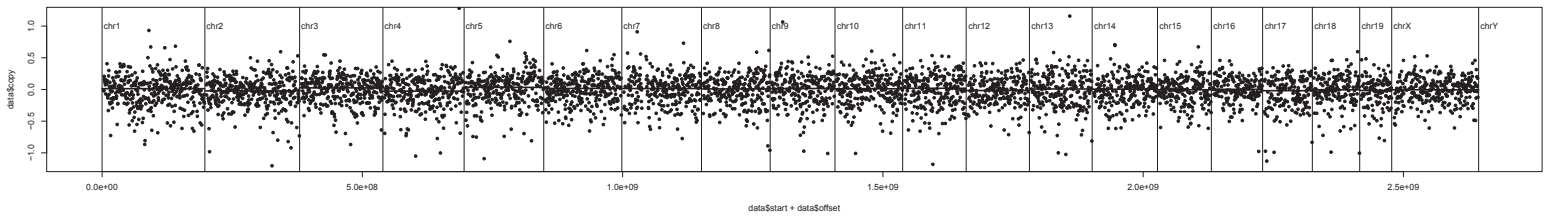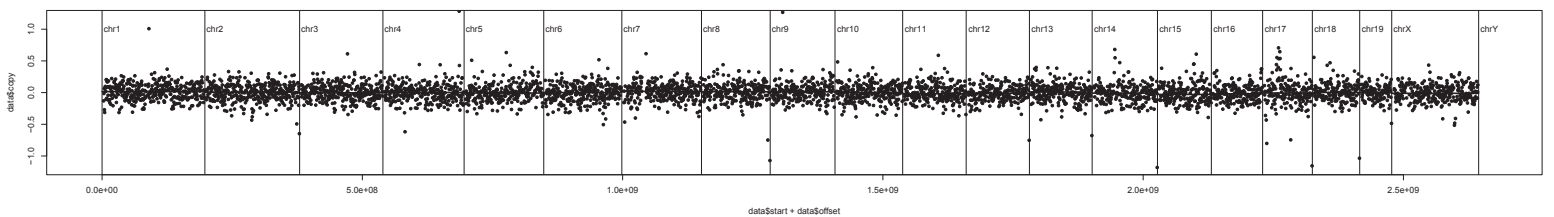

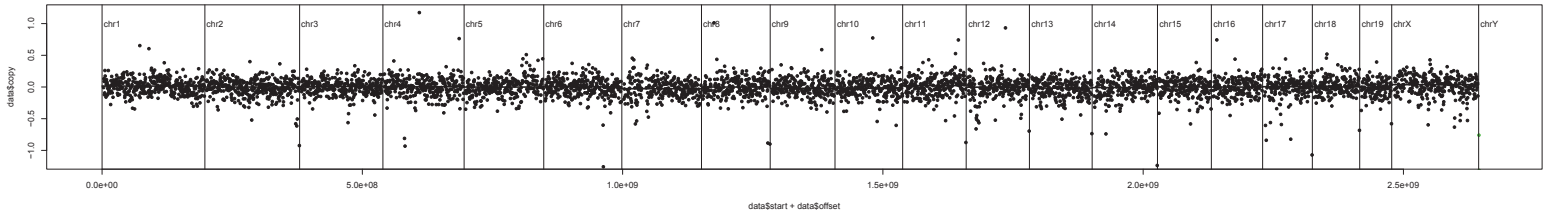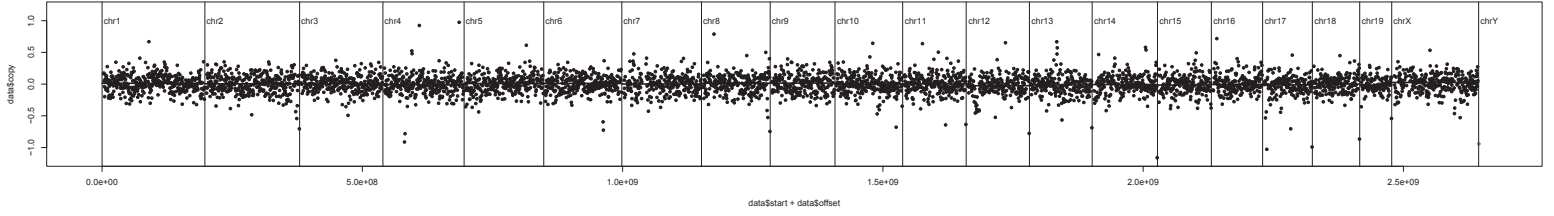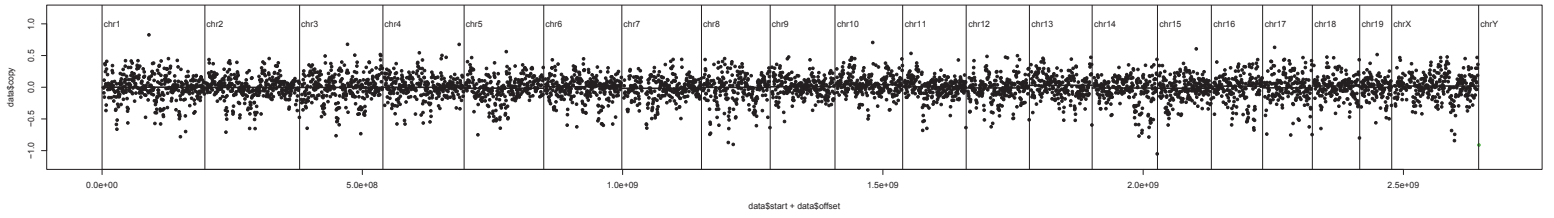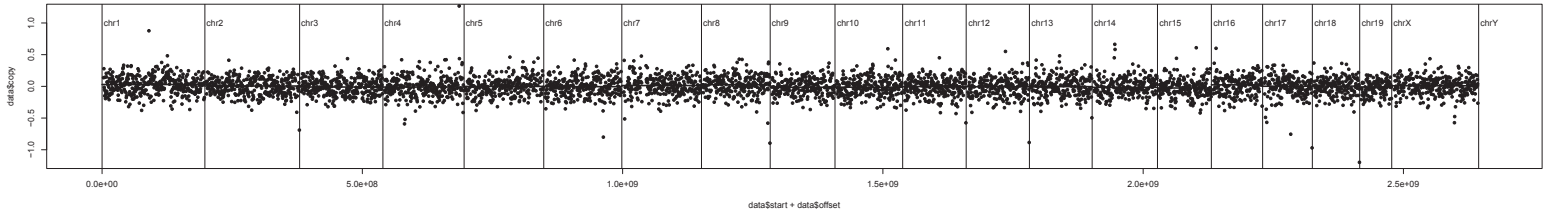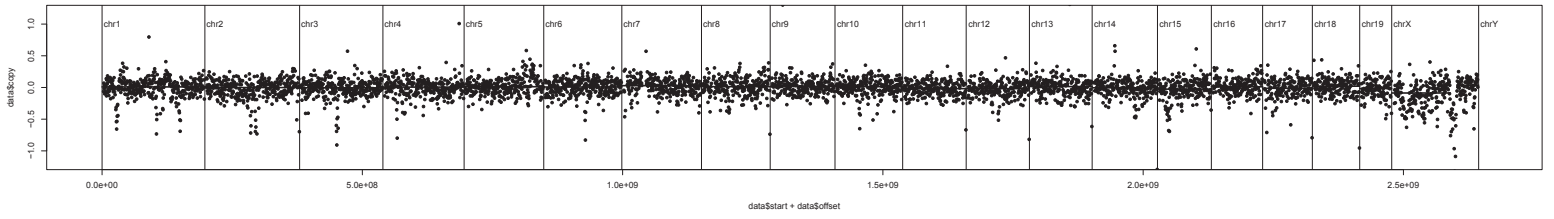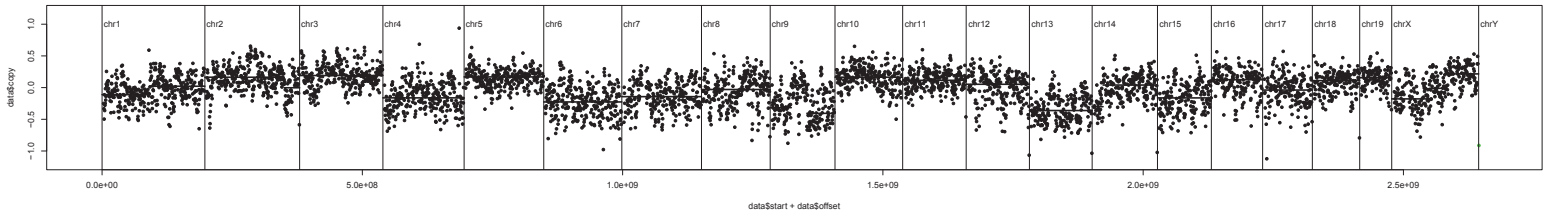

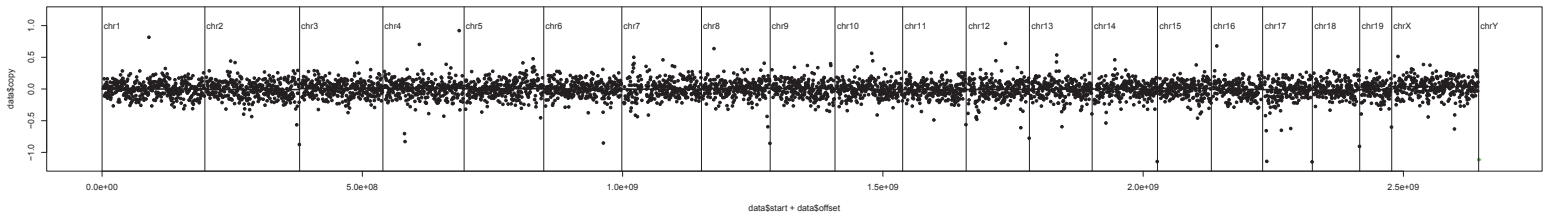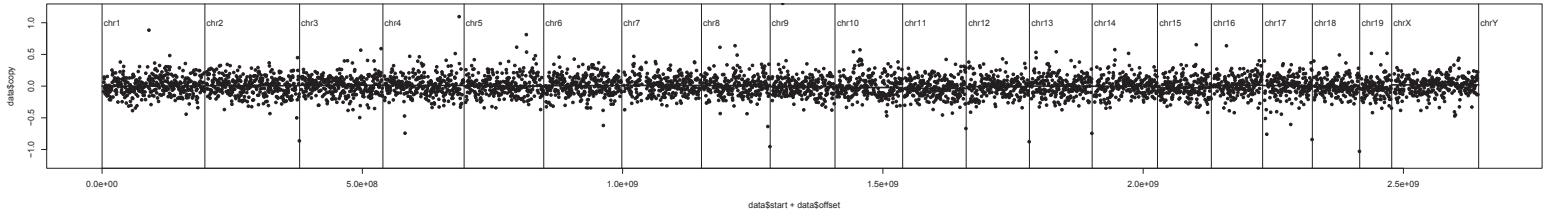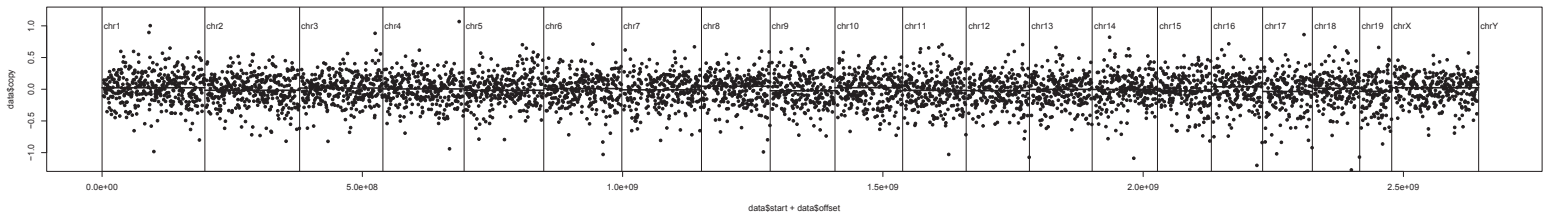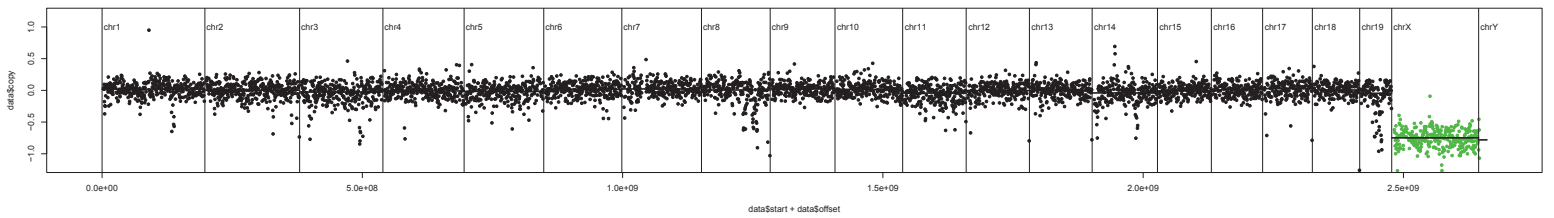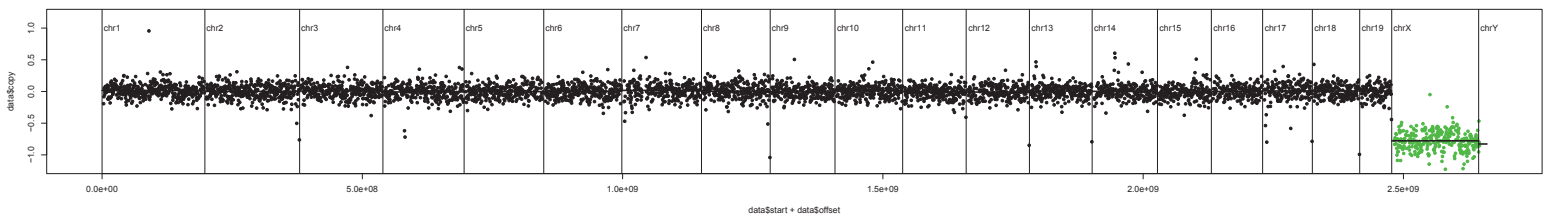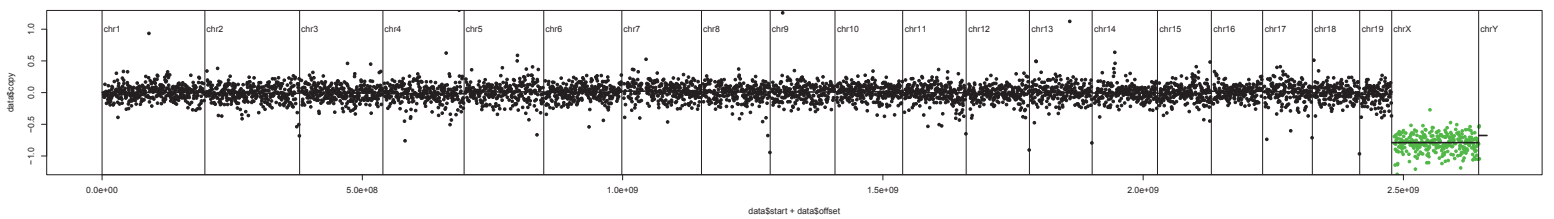

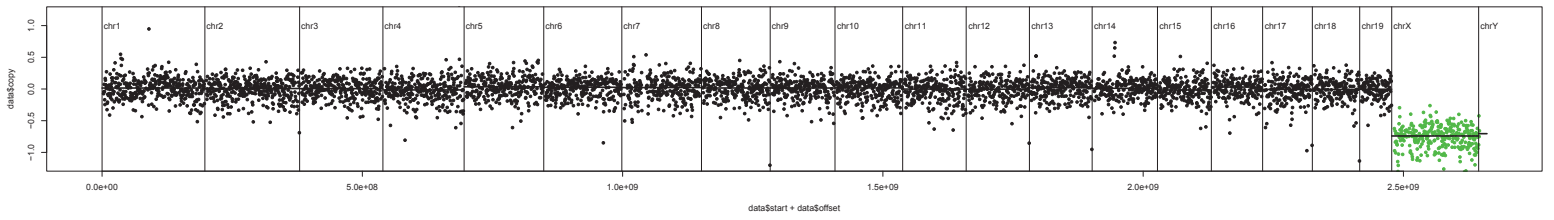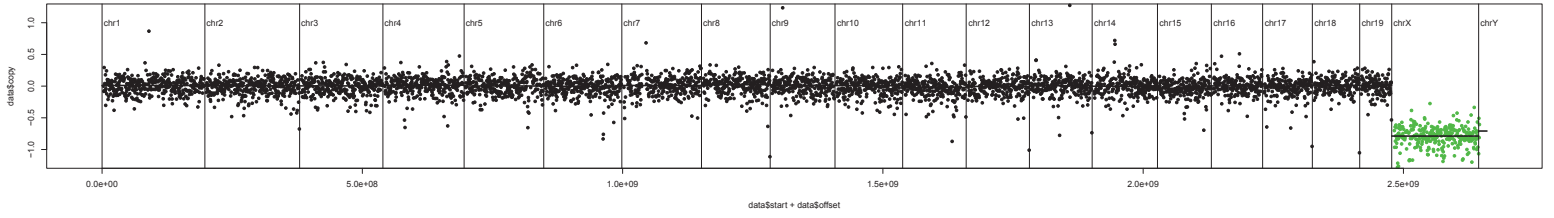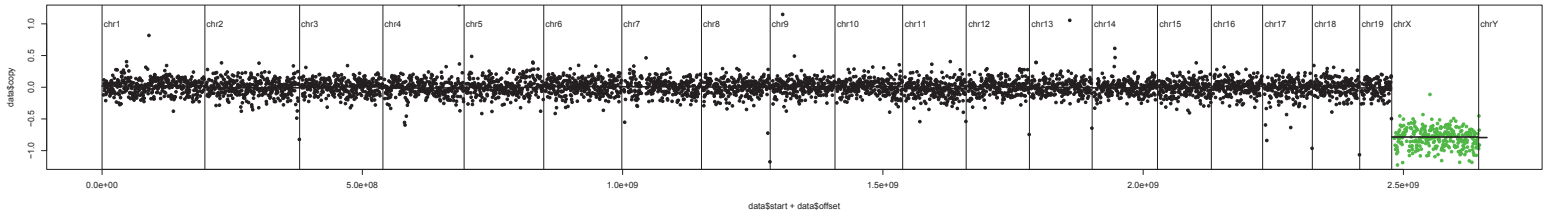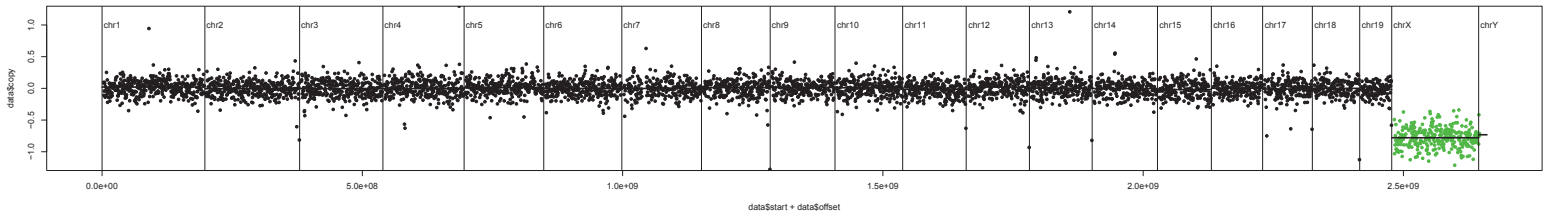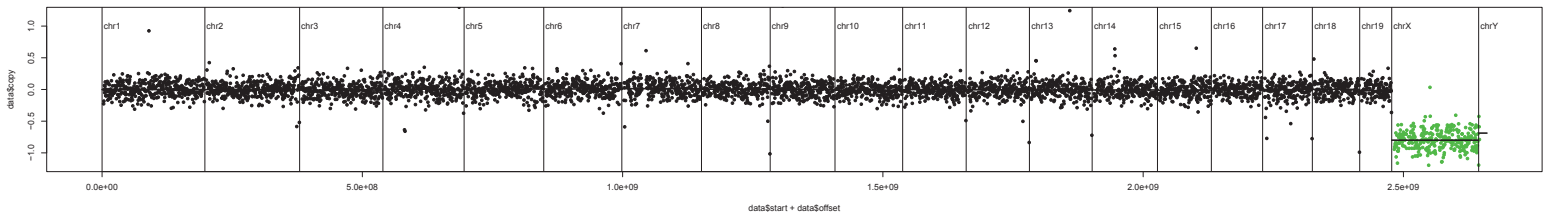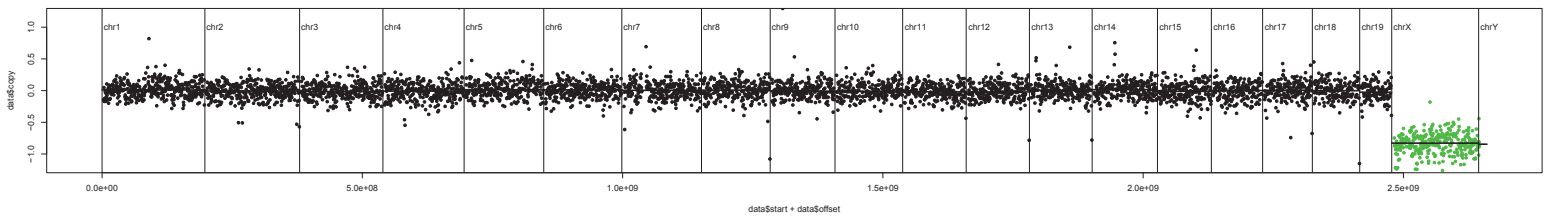

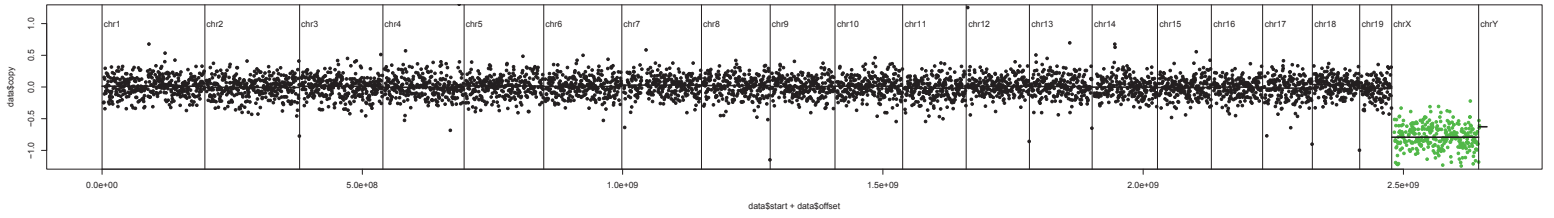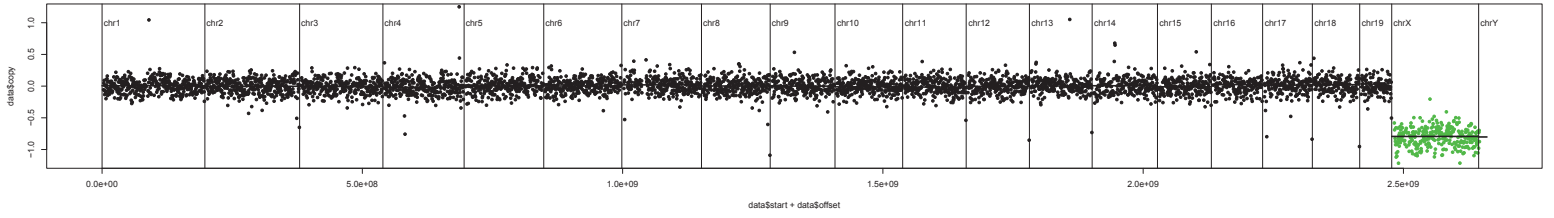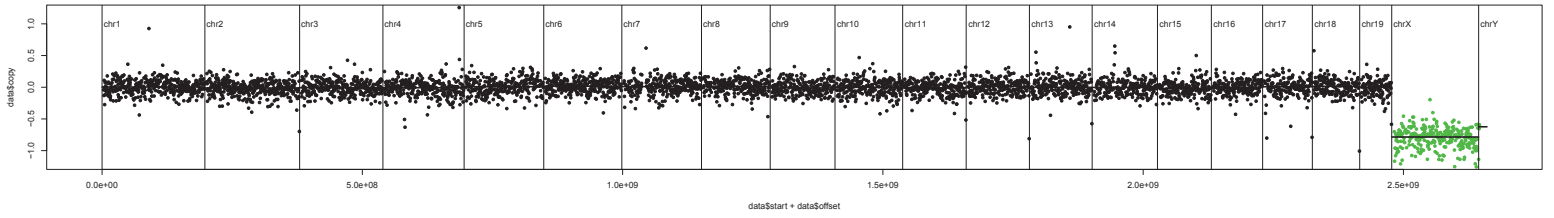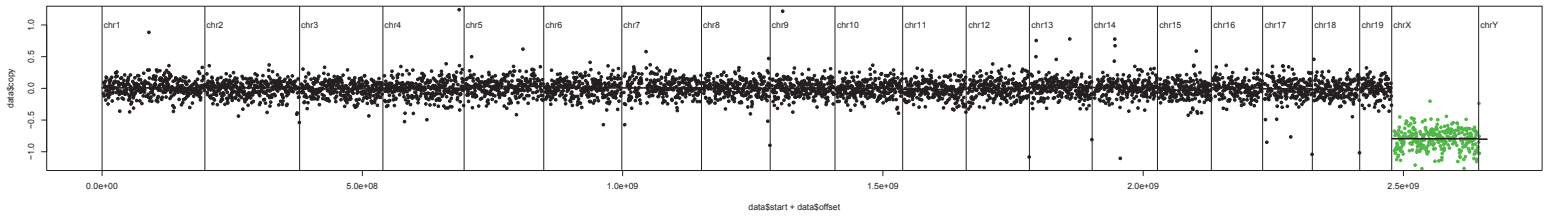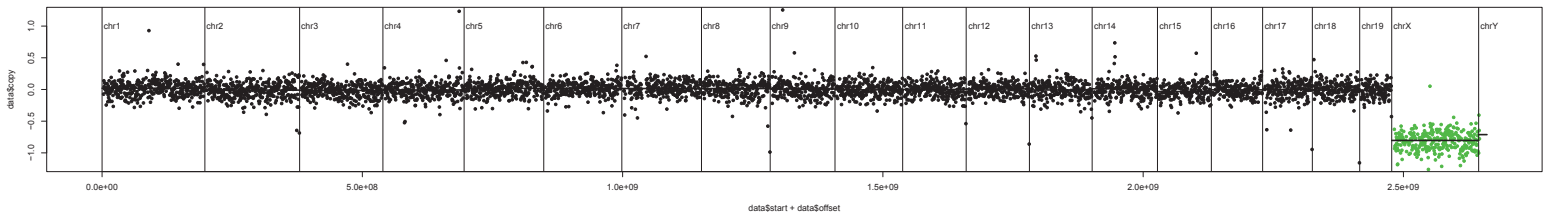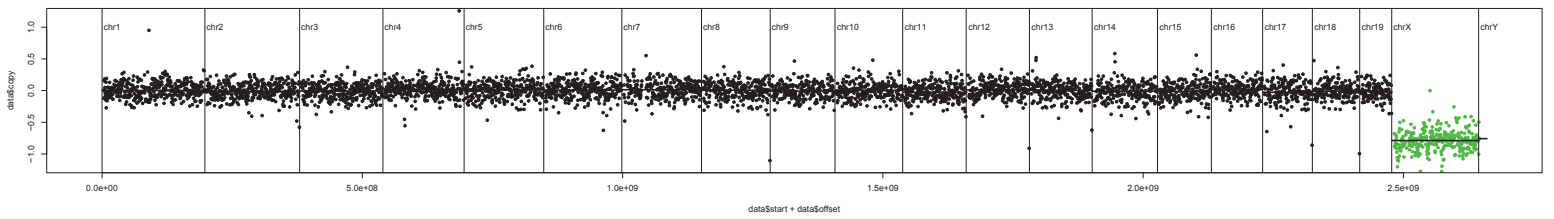

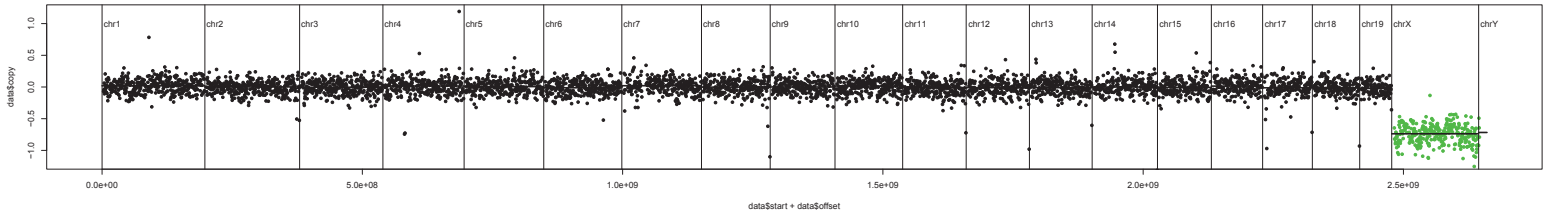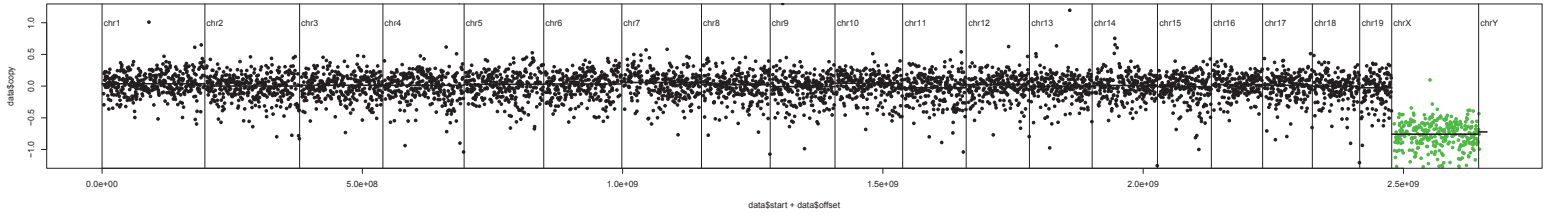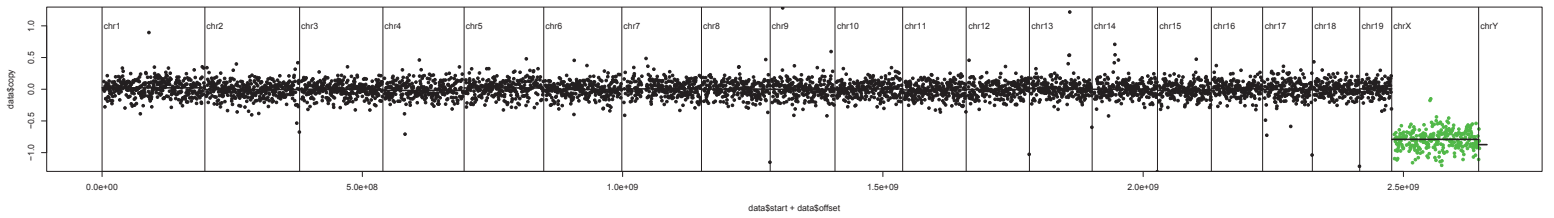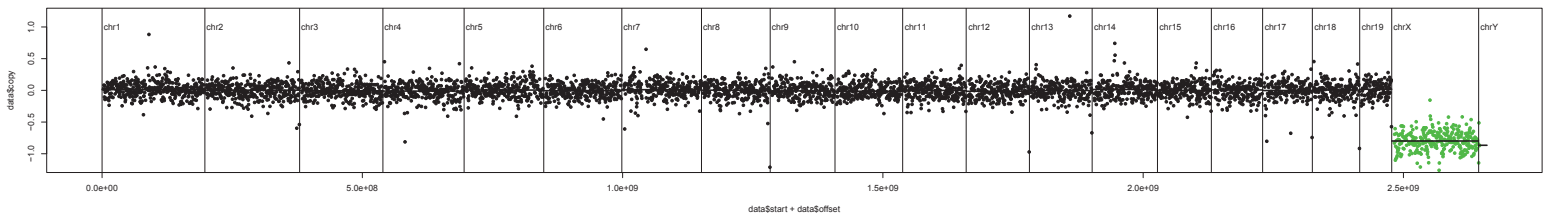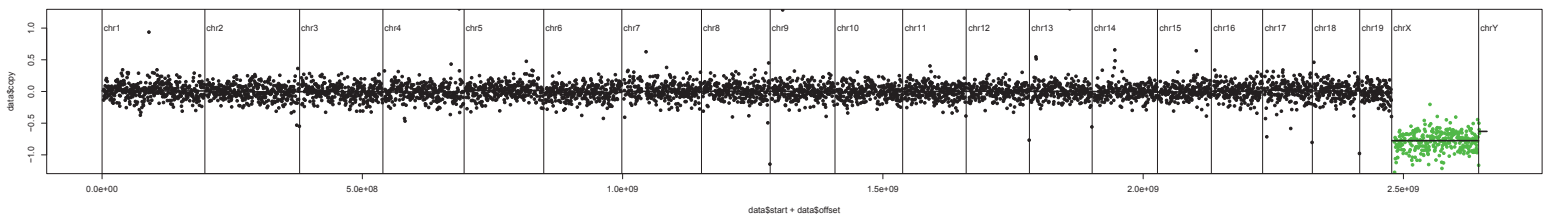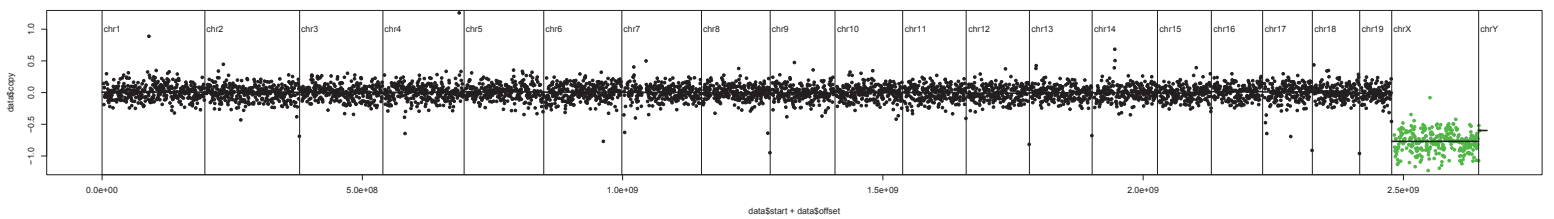

# Human Keratinocytes

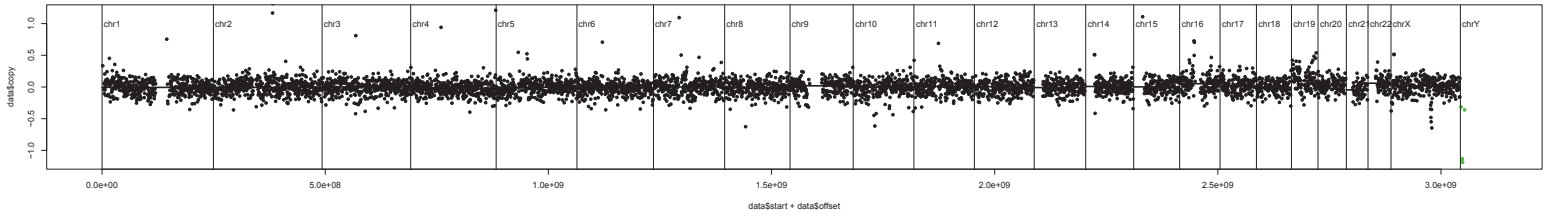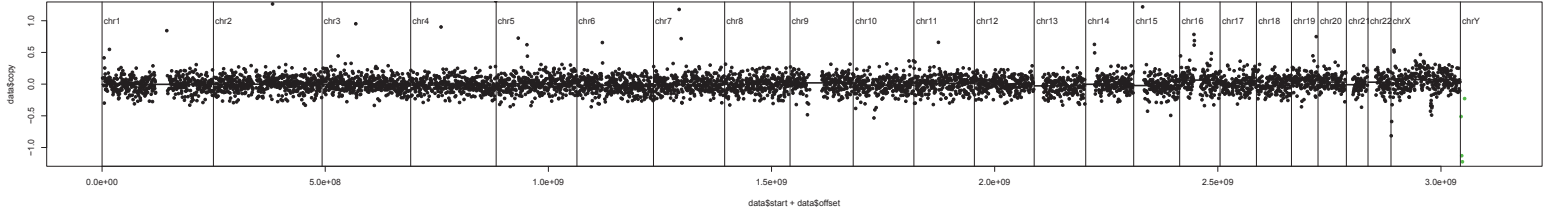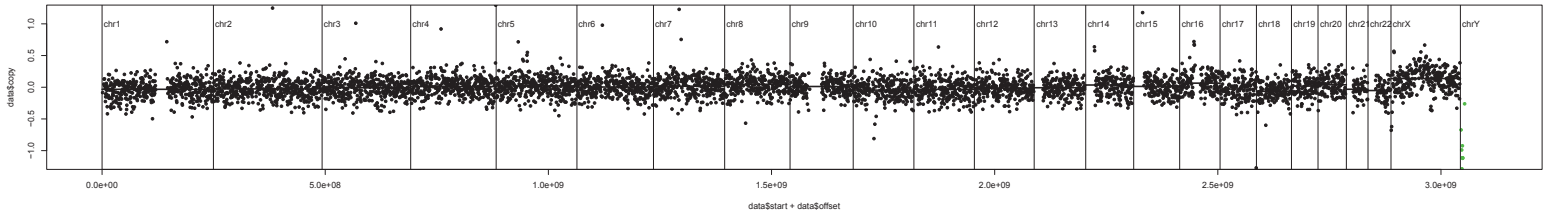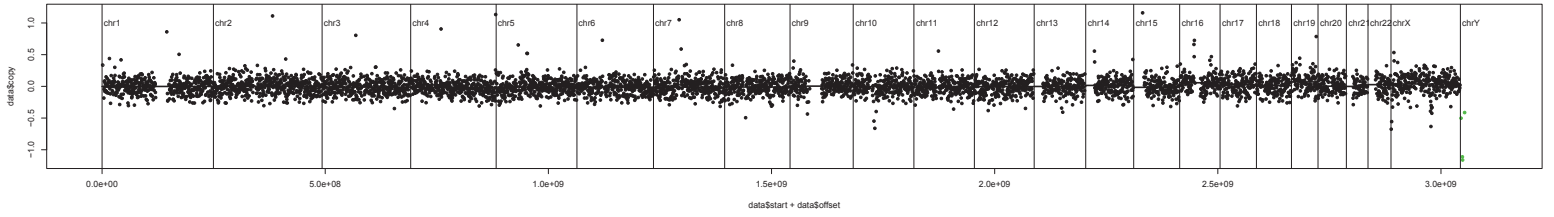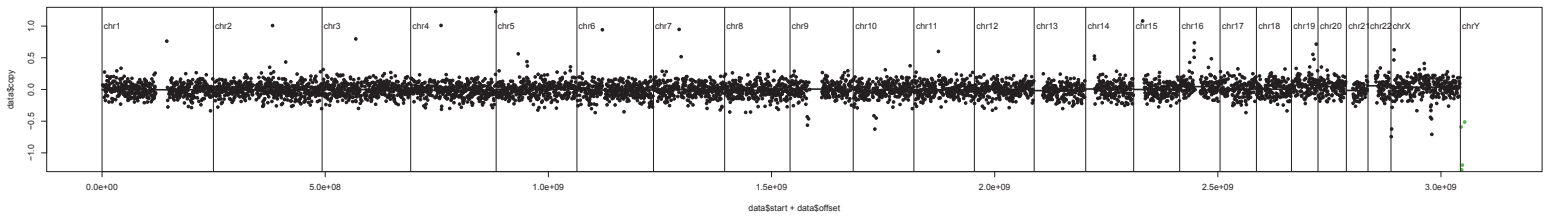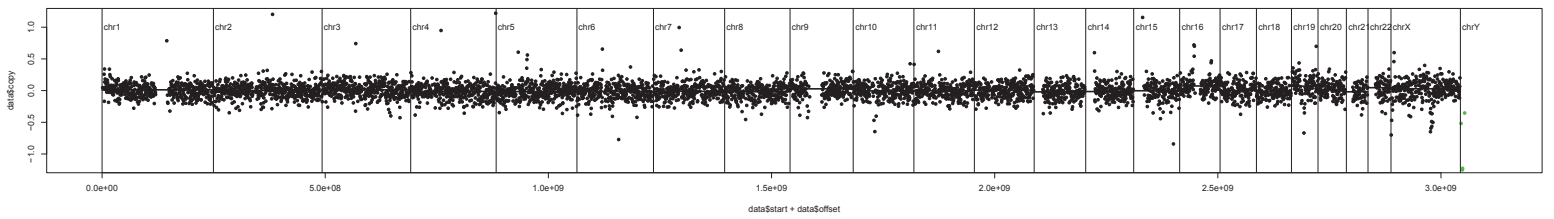

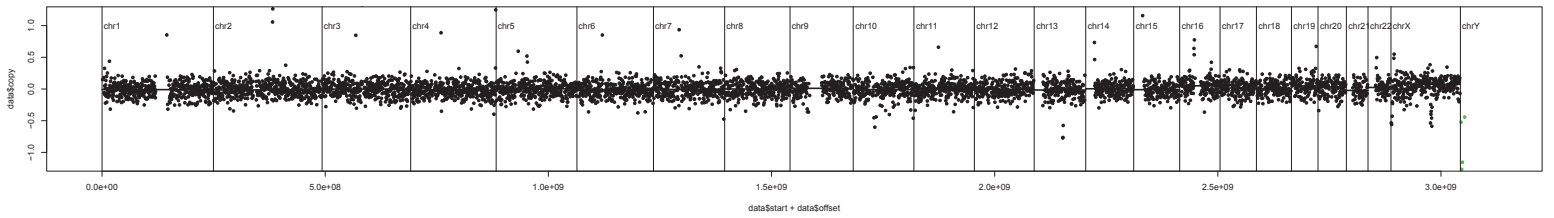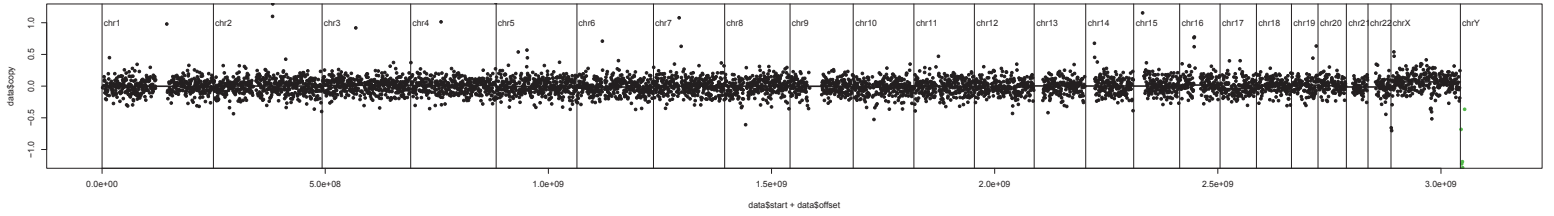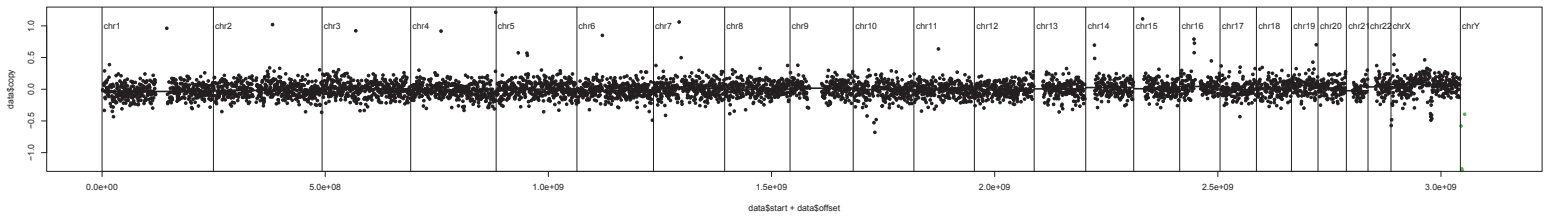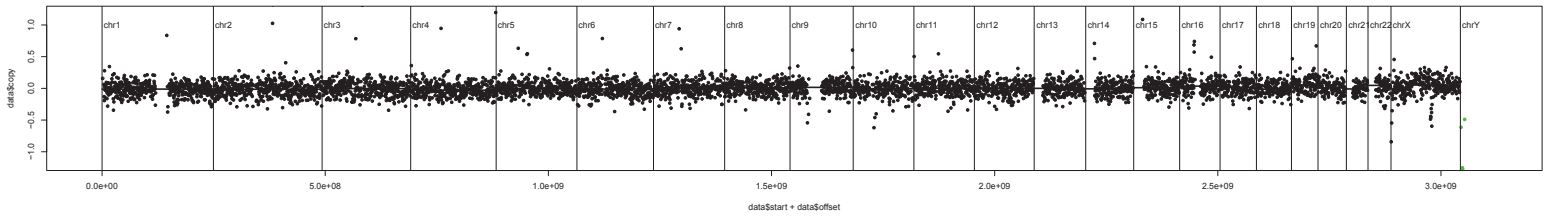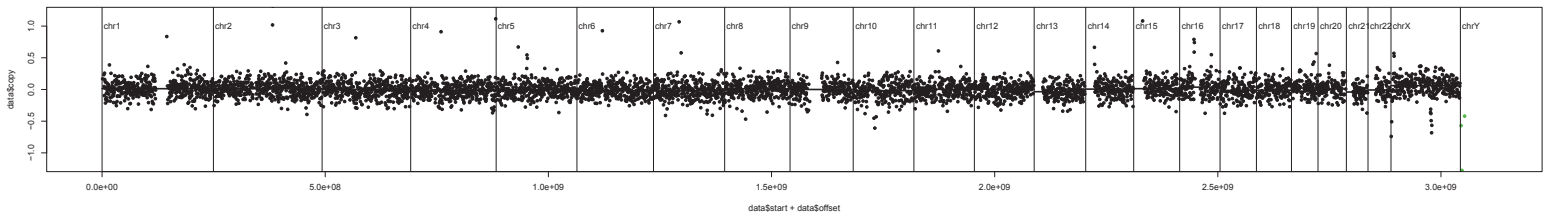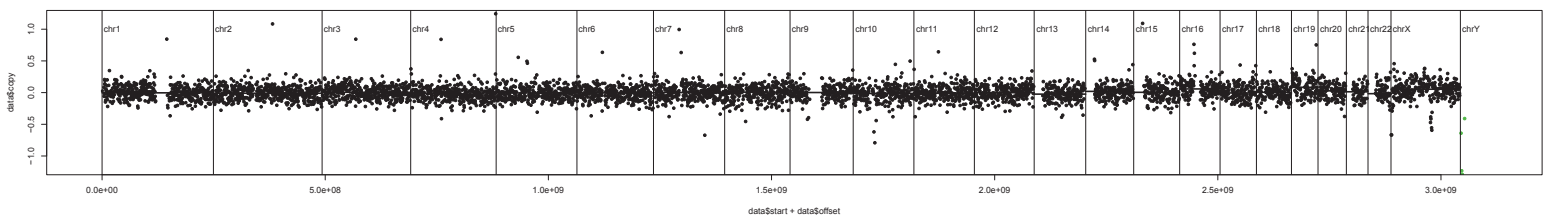



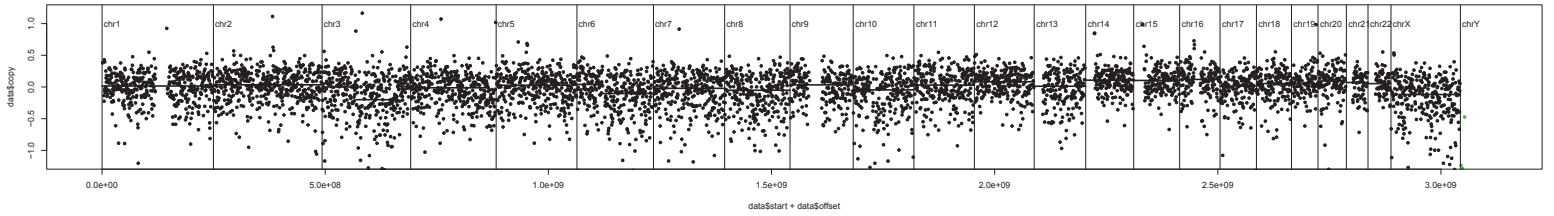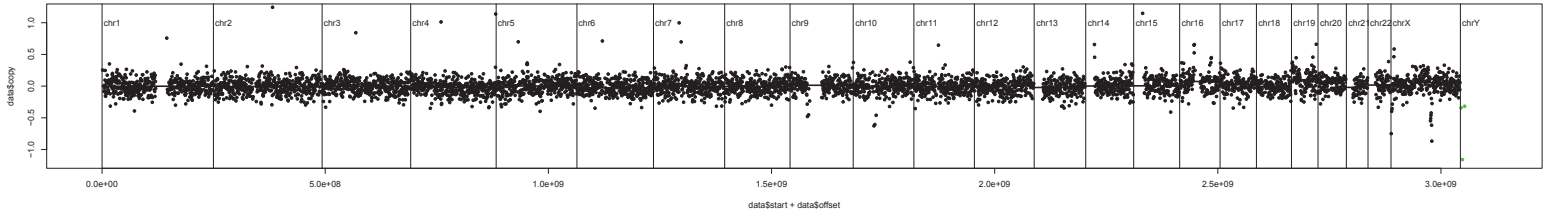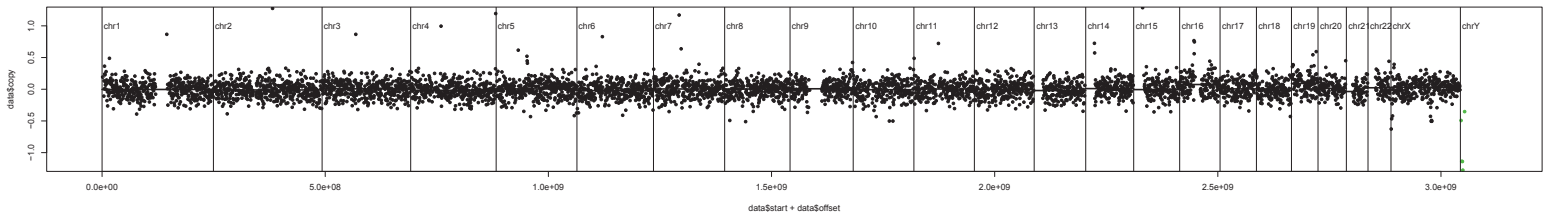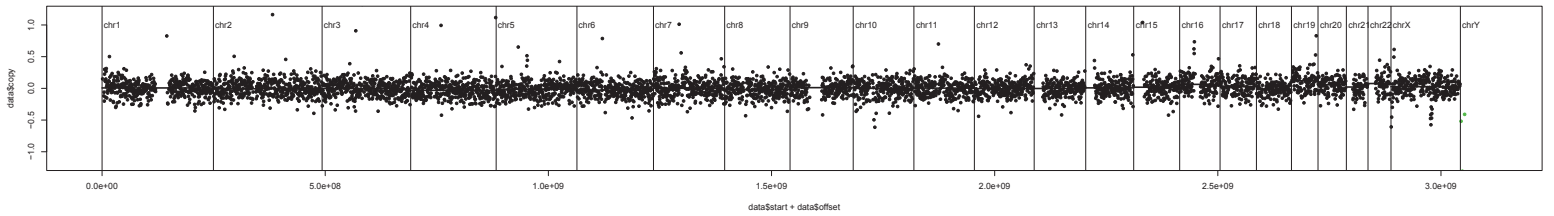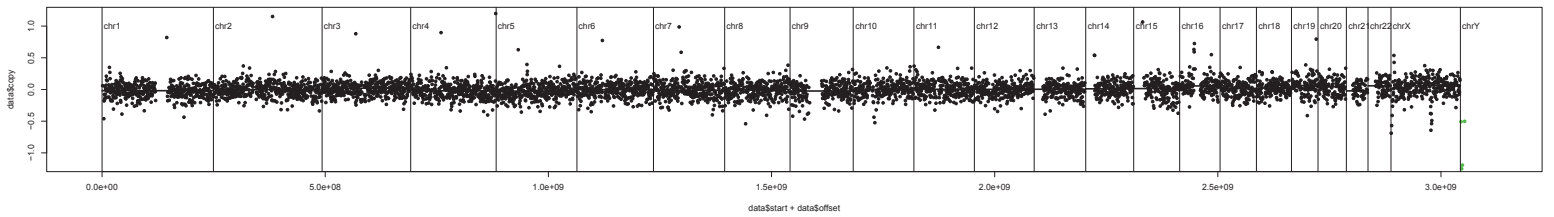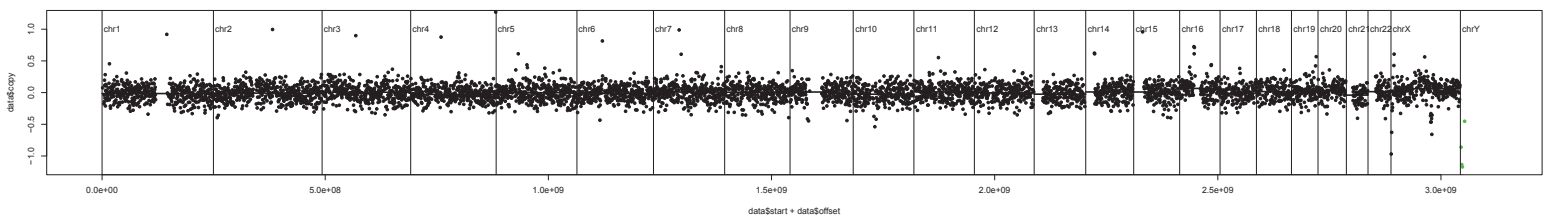

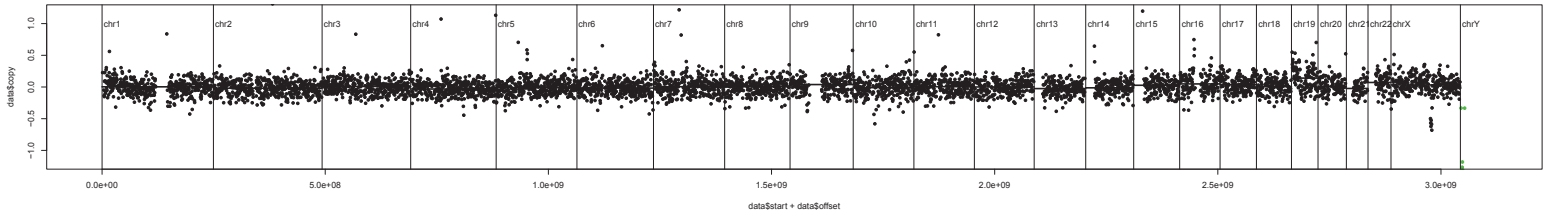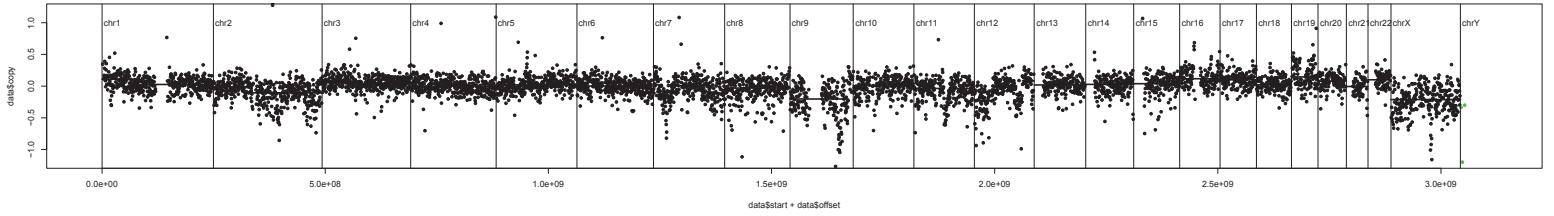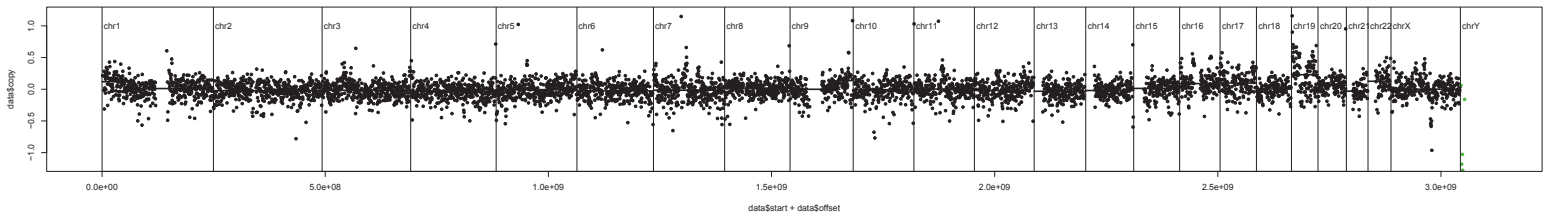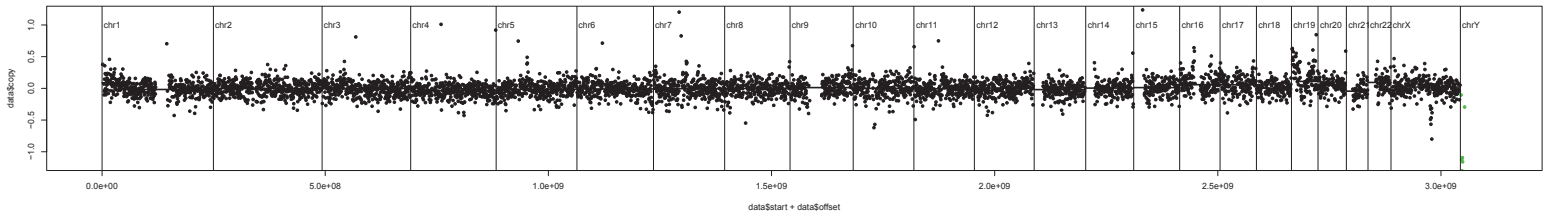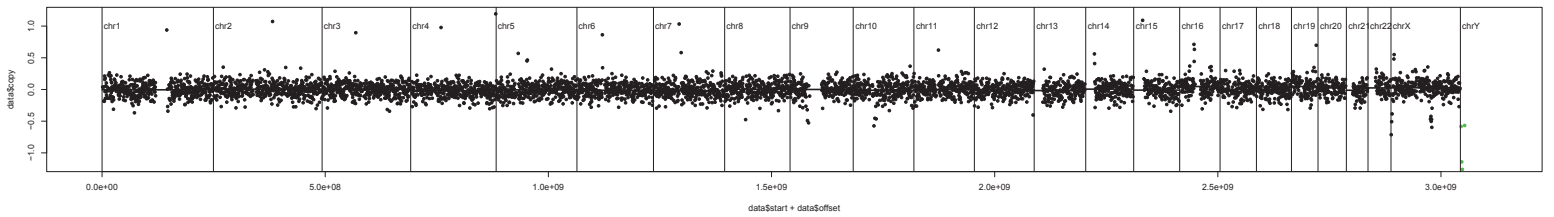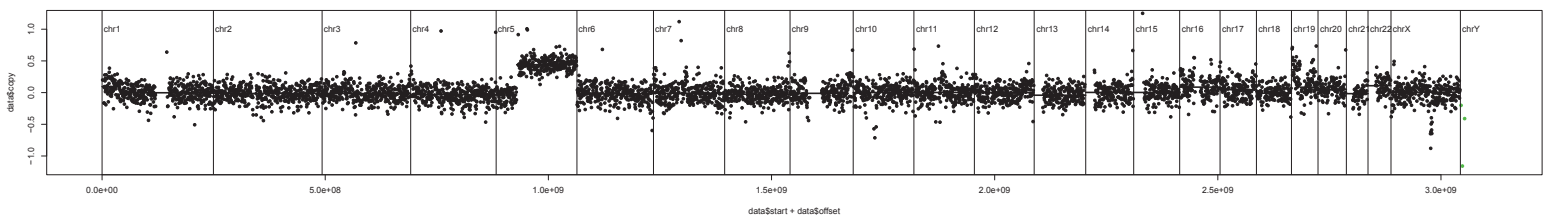

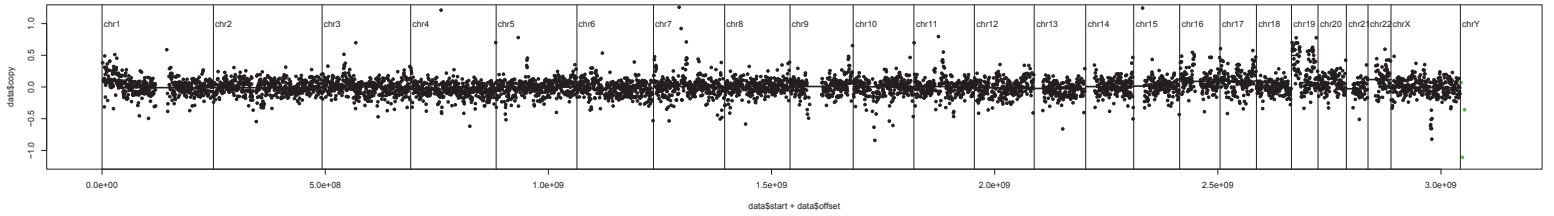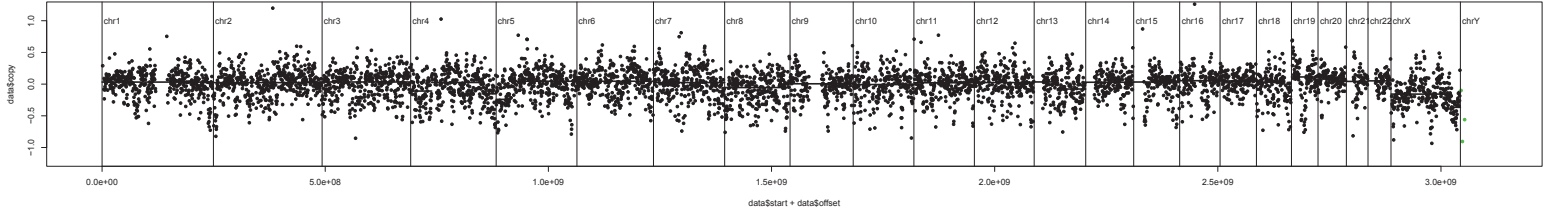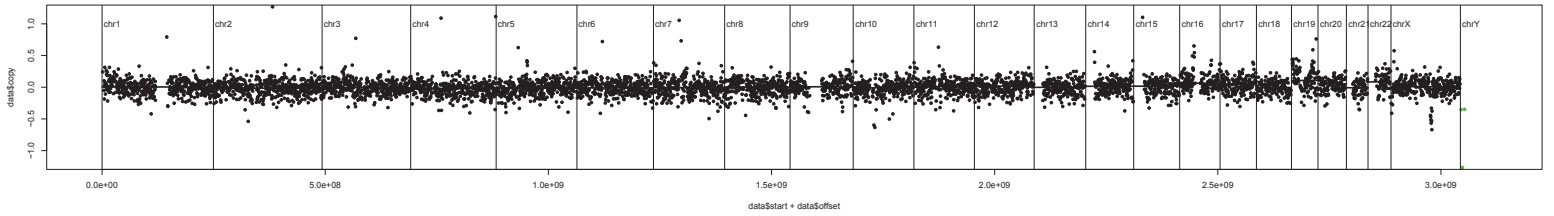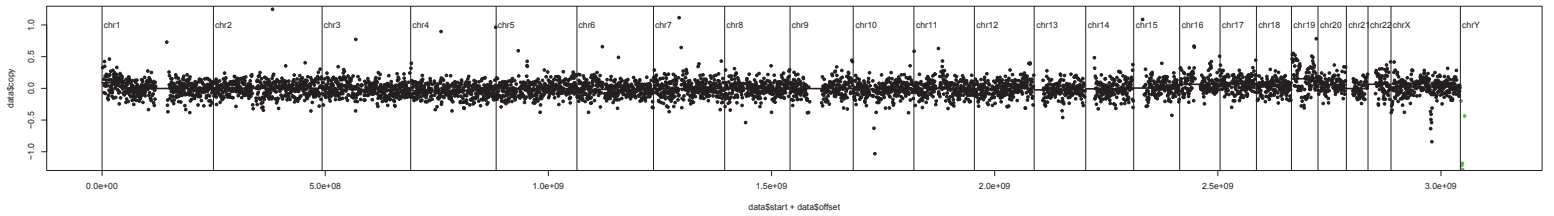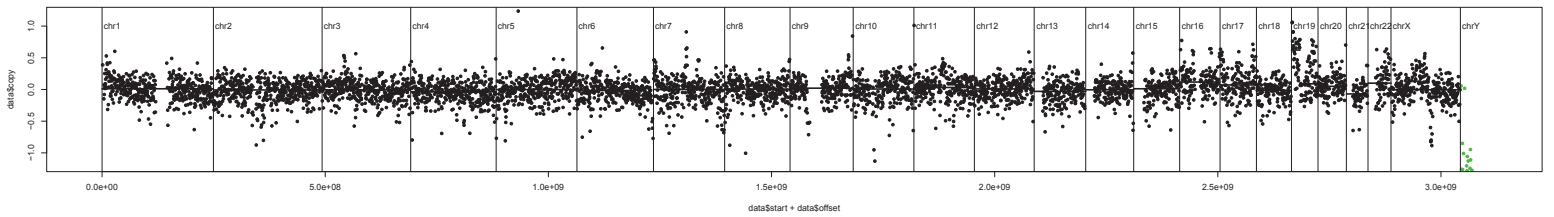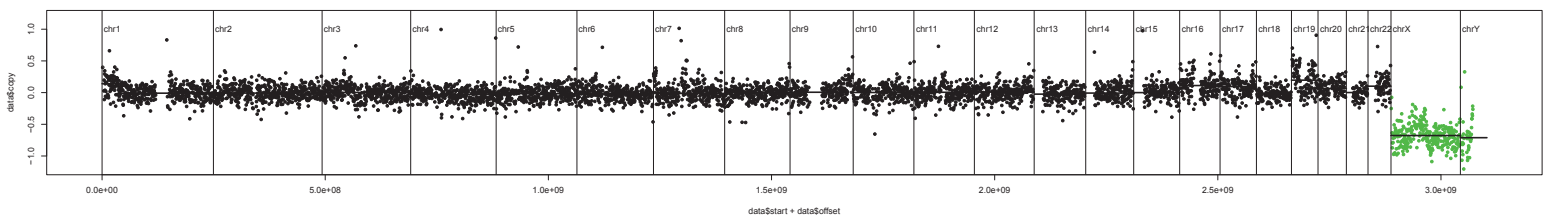

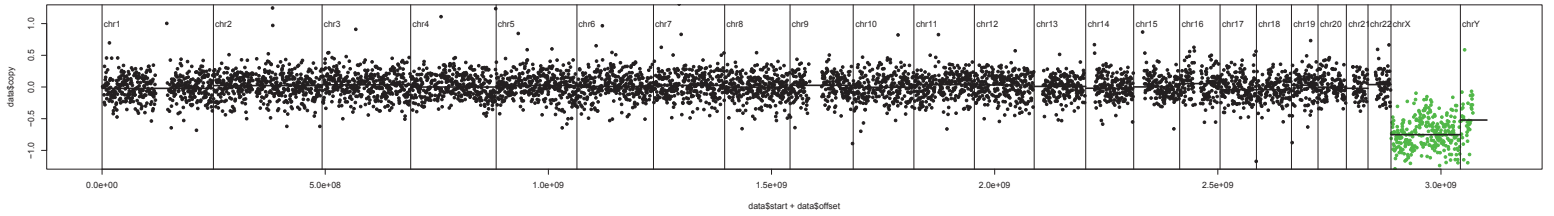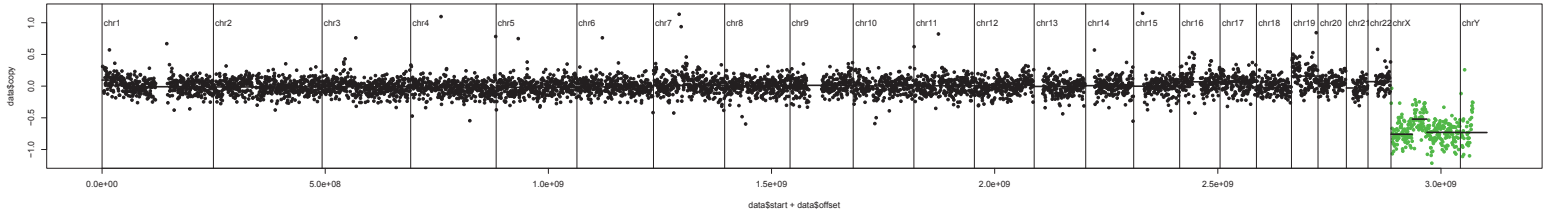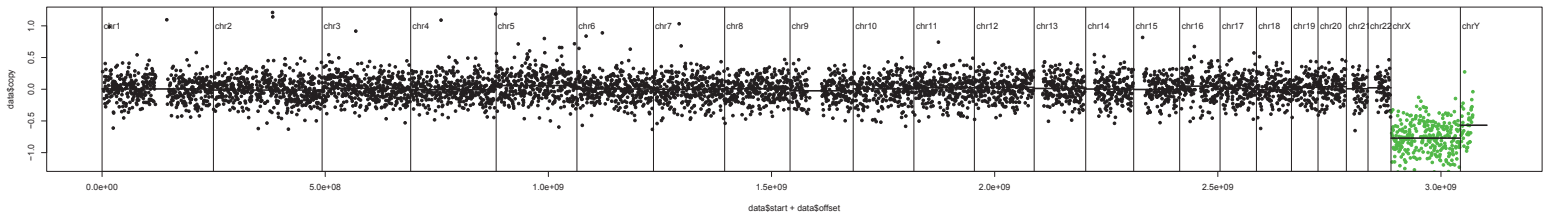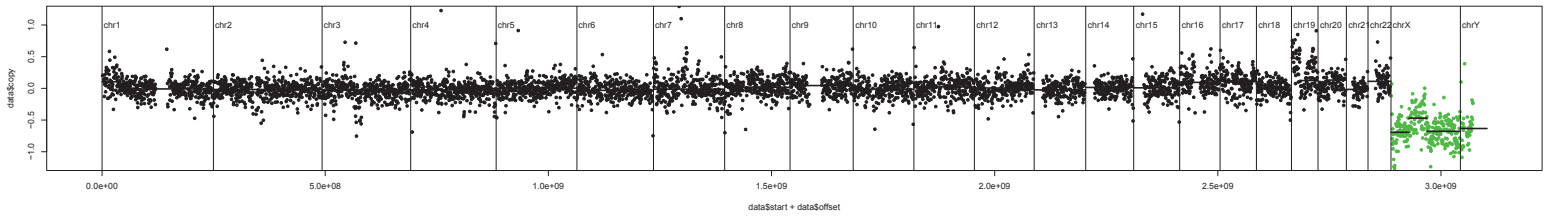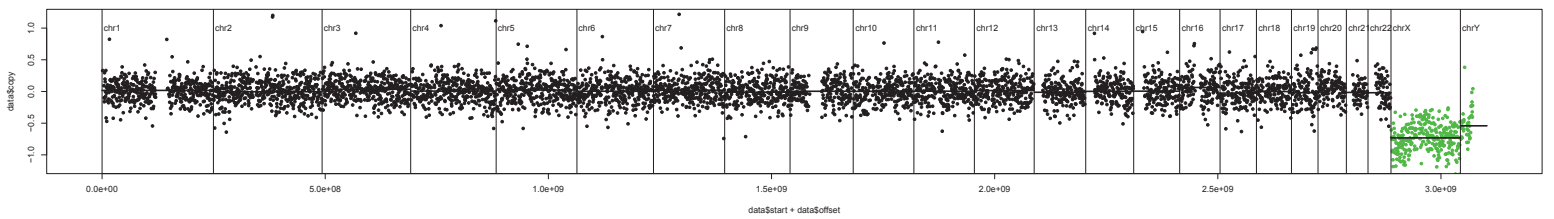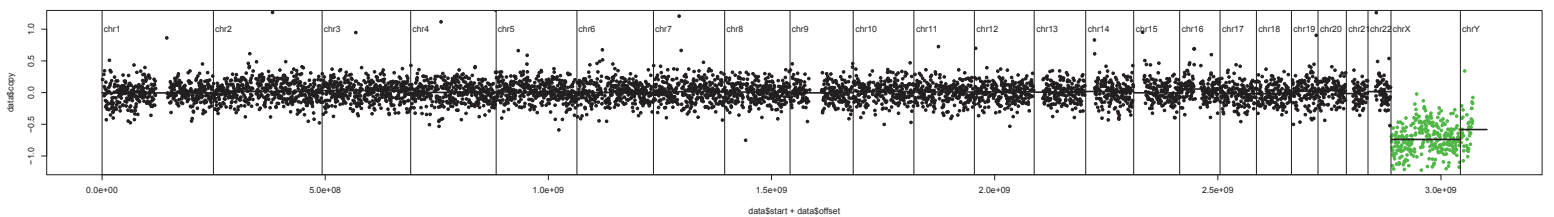

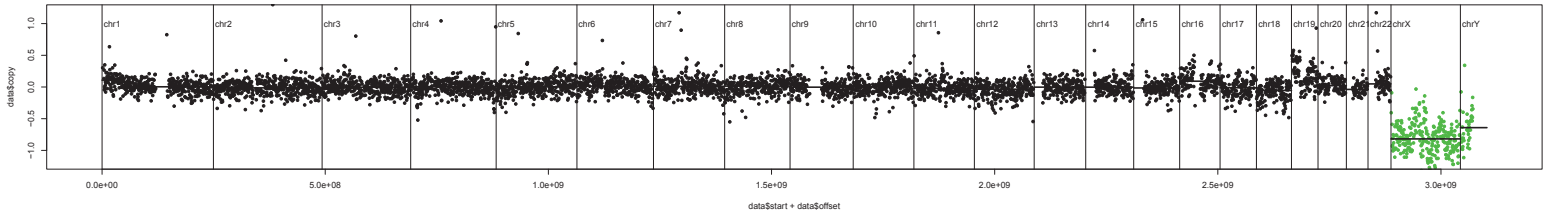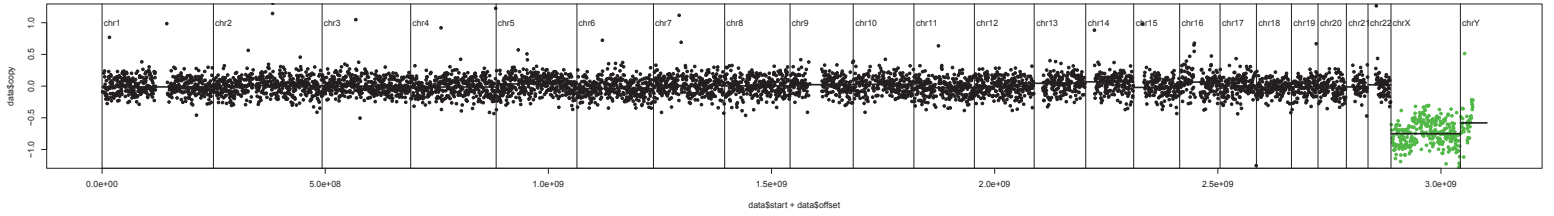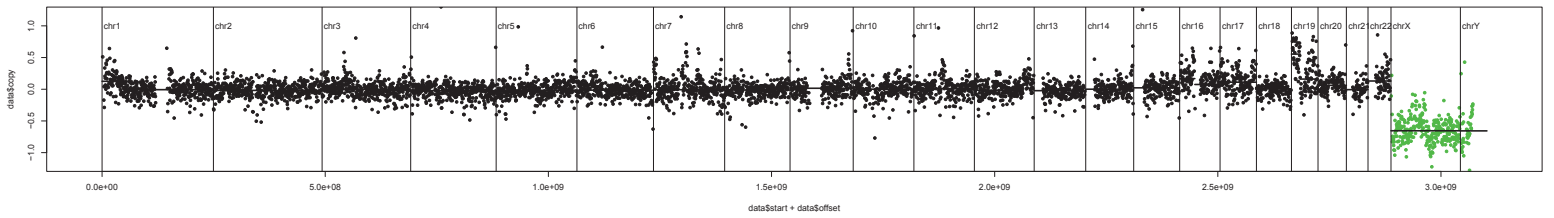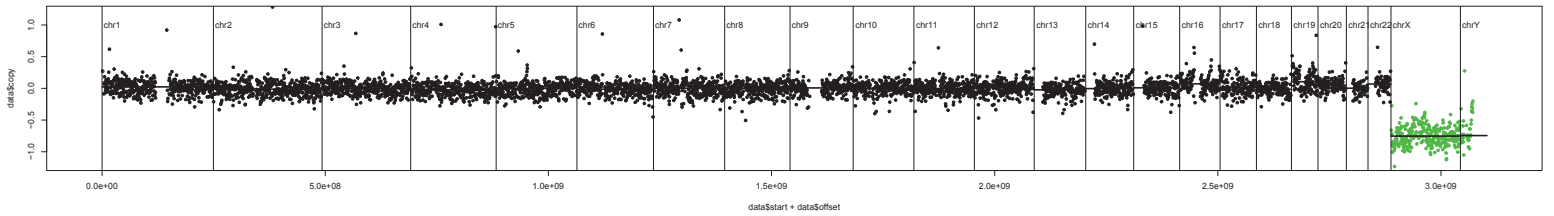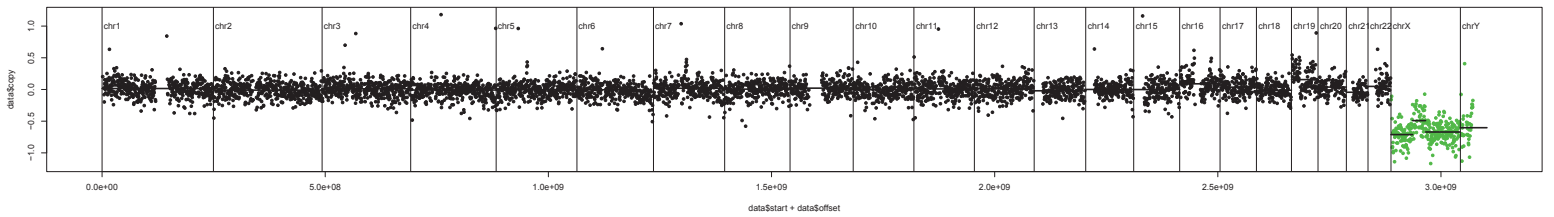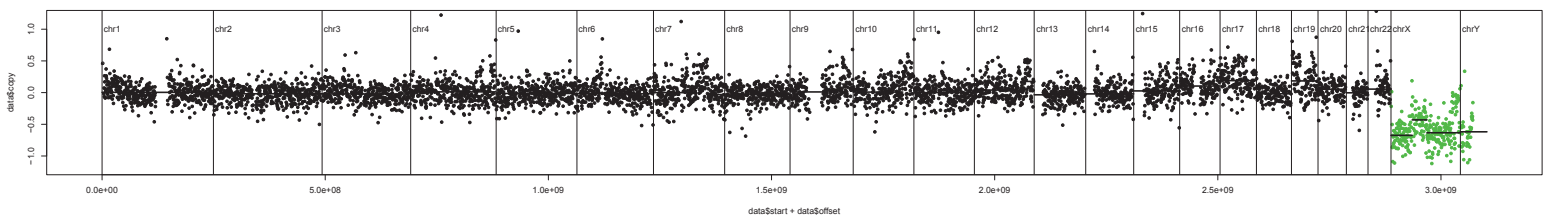

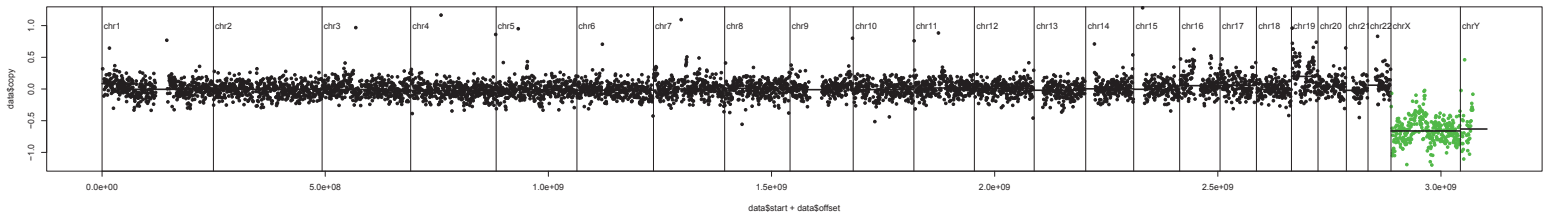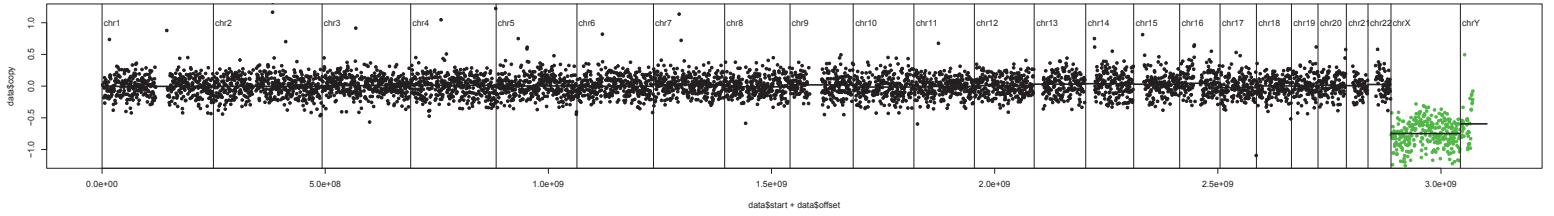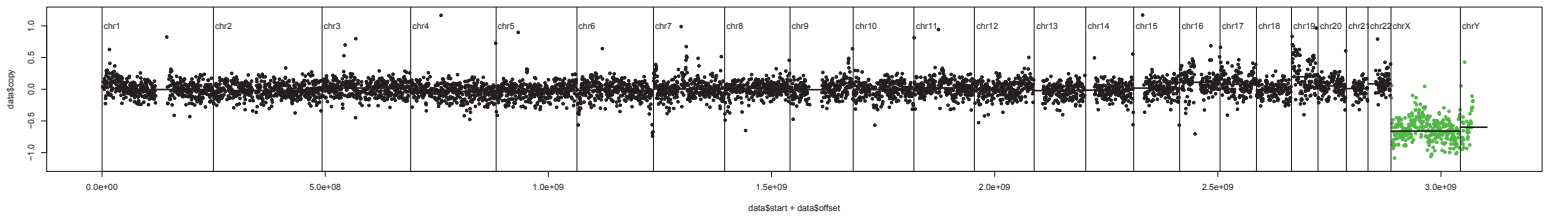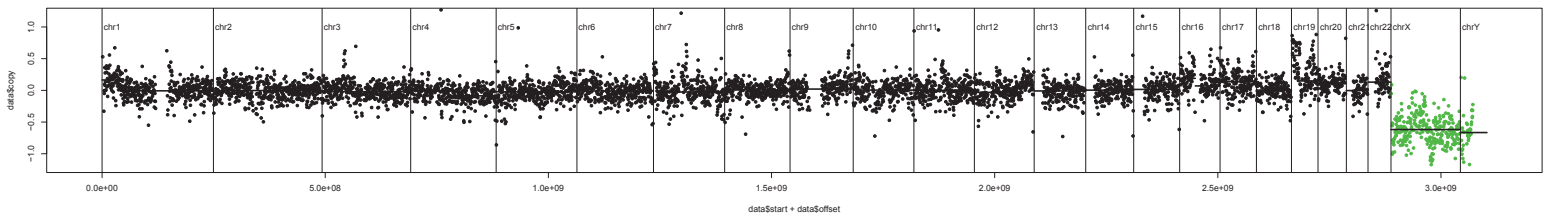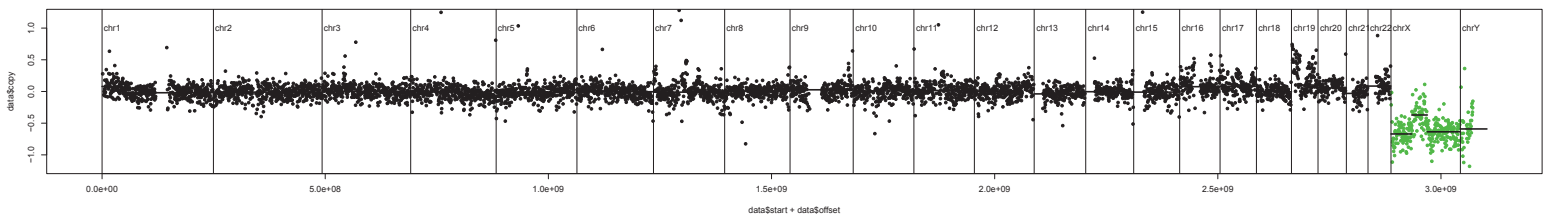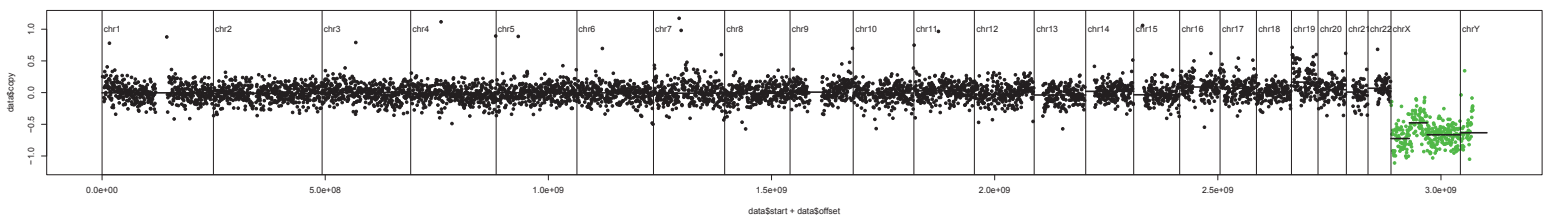

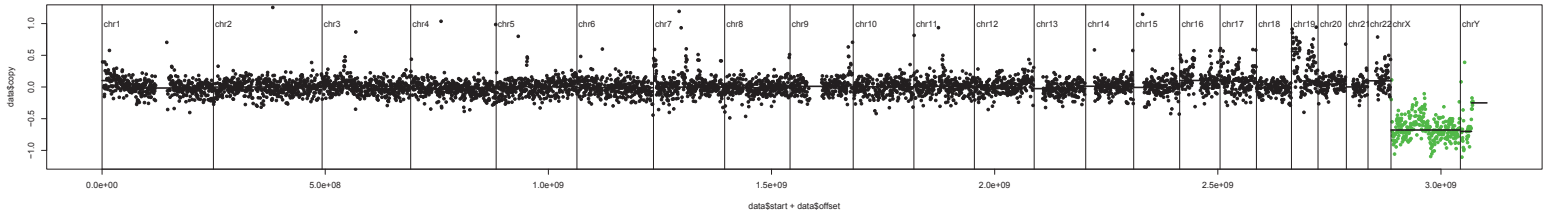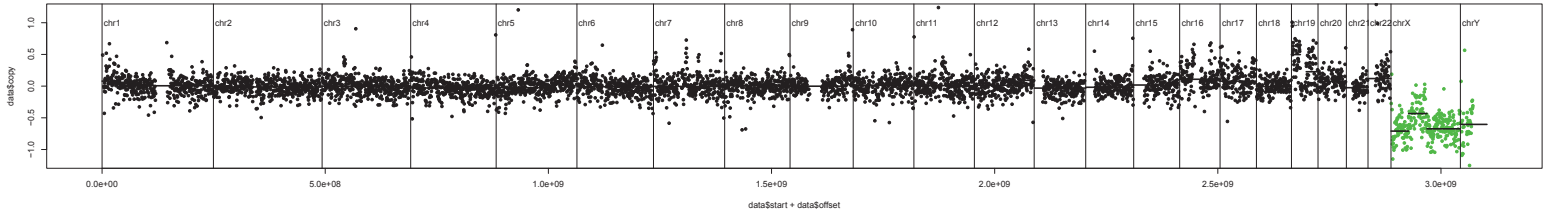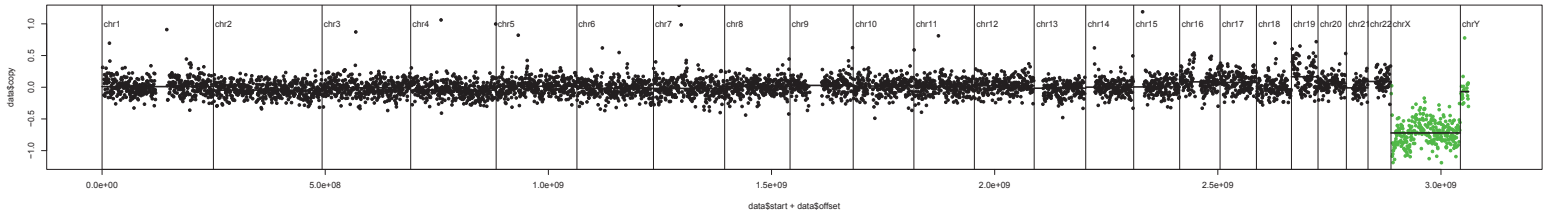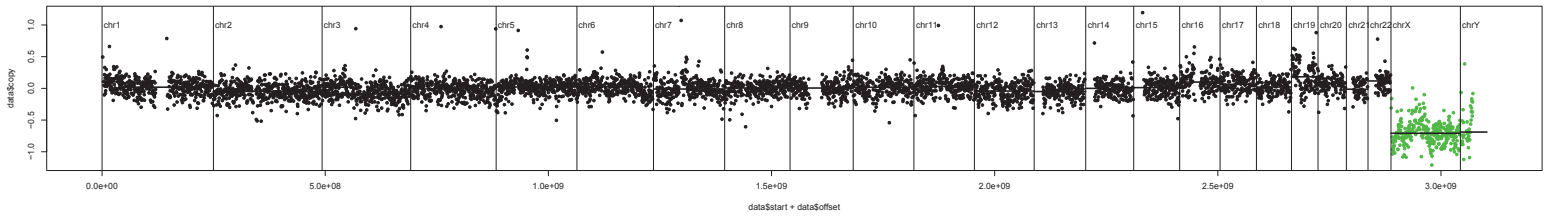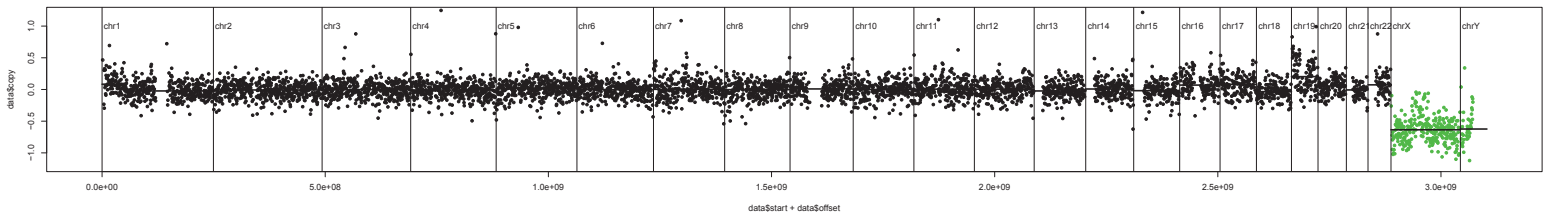

# Mouse Neural Progenitor Cells

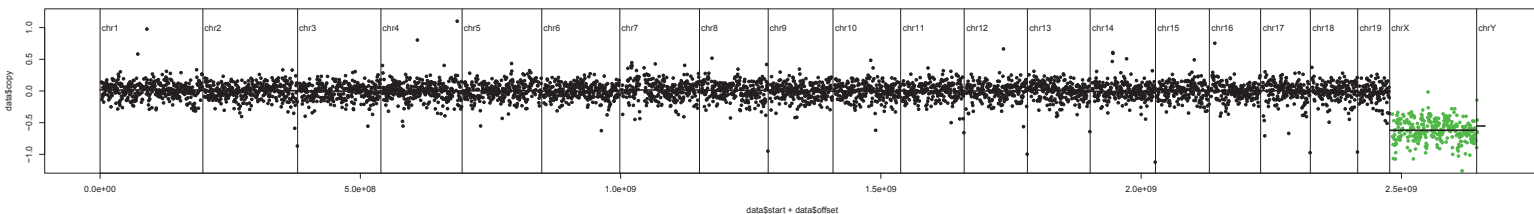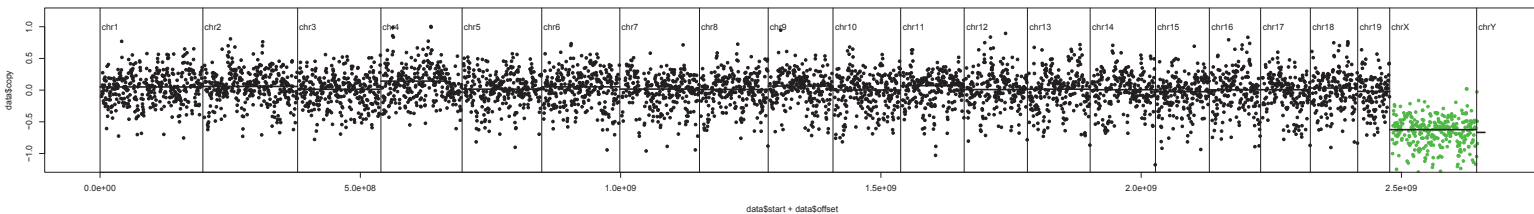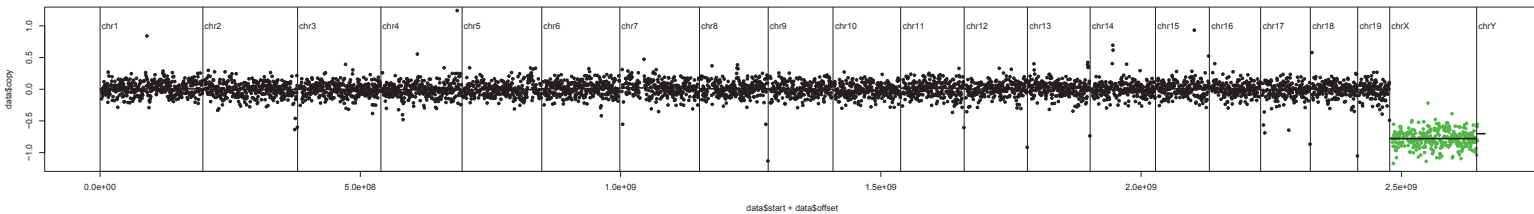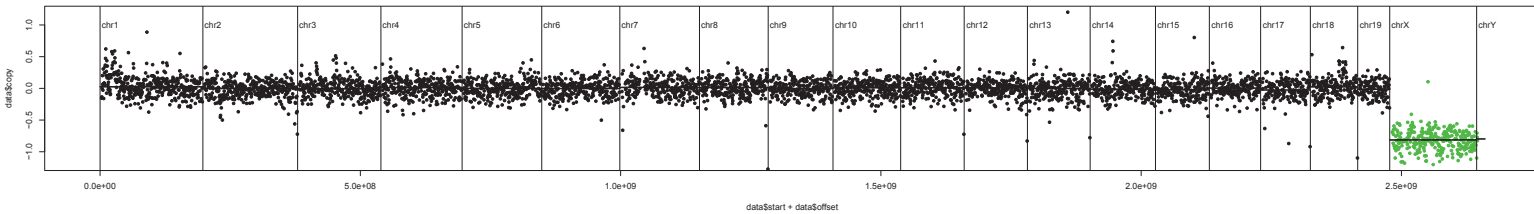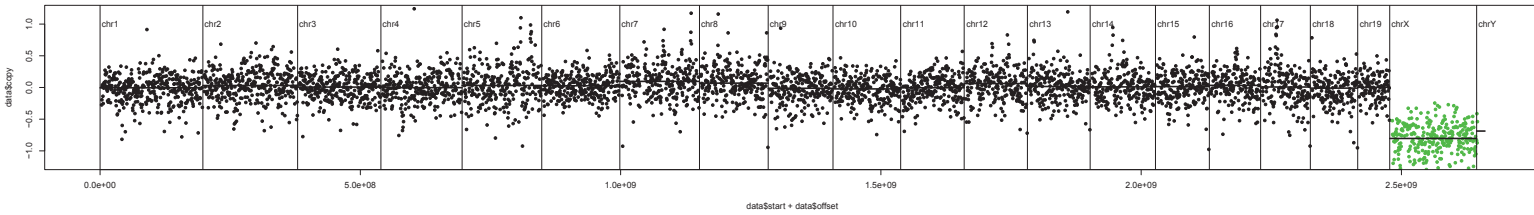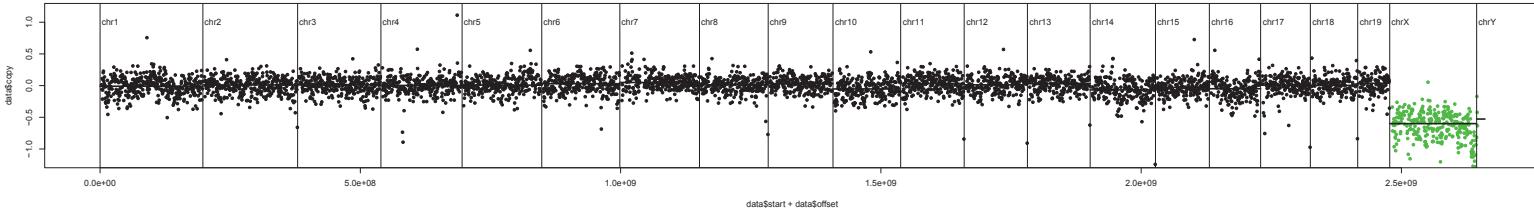



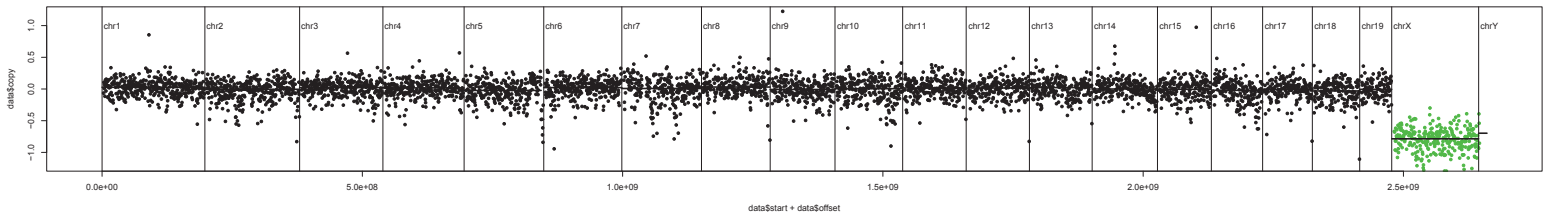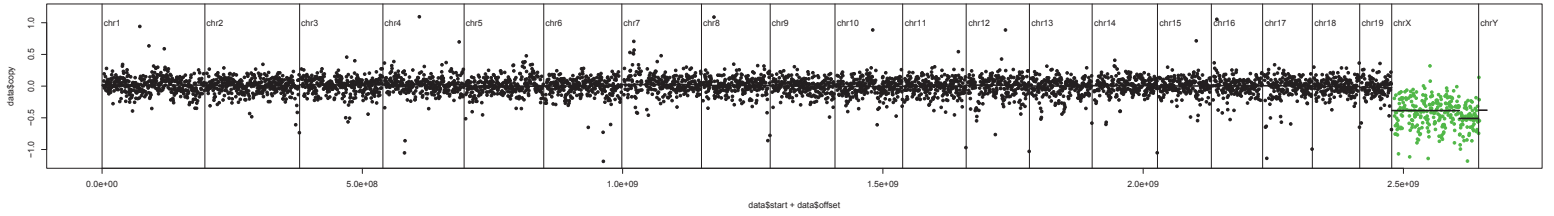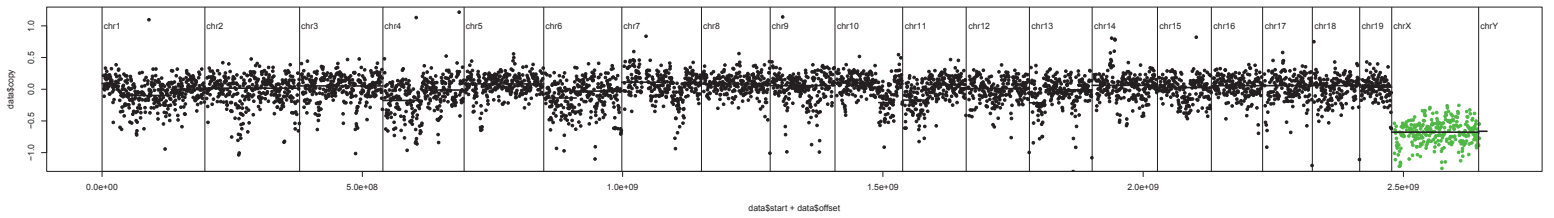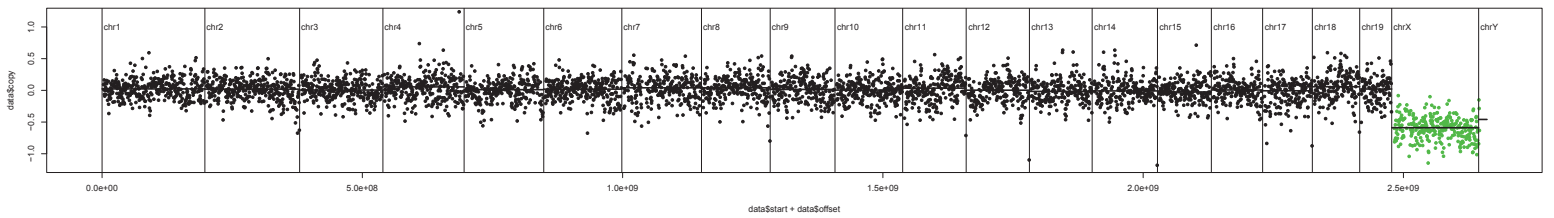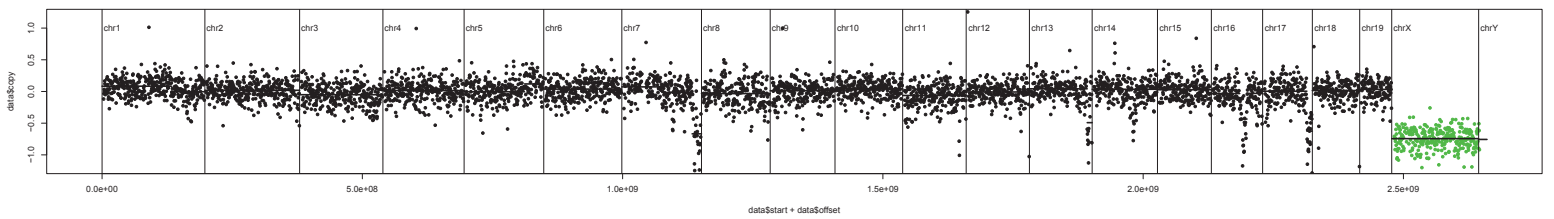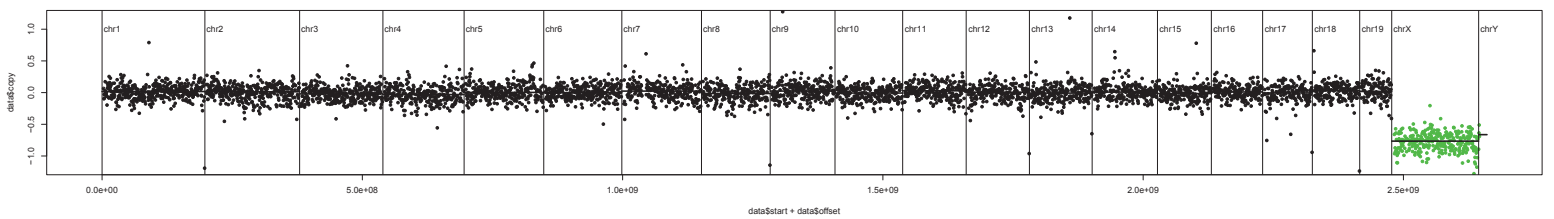

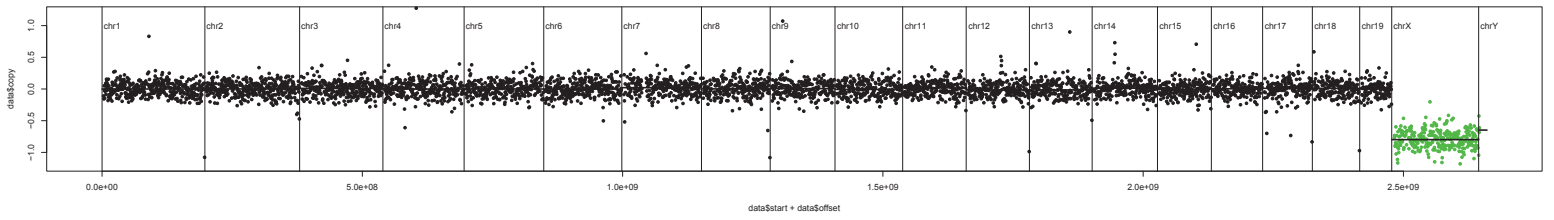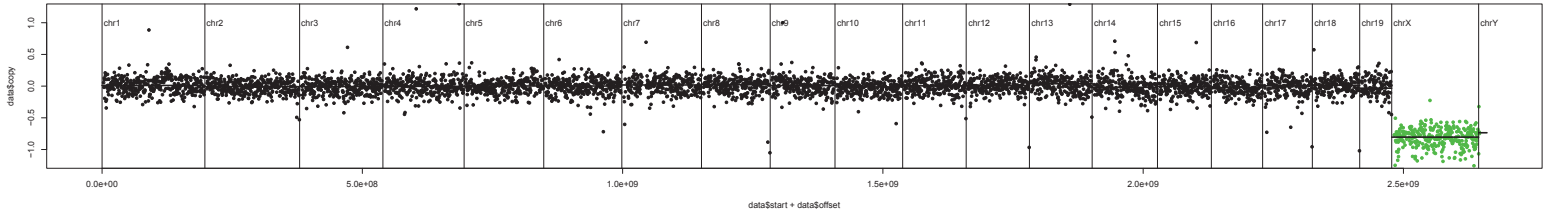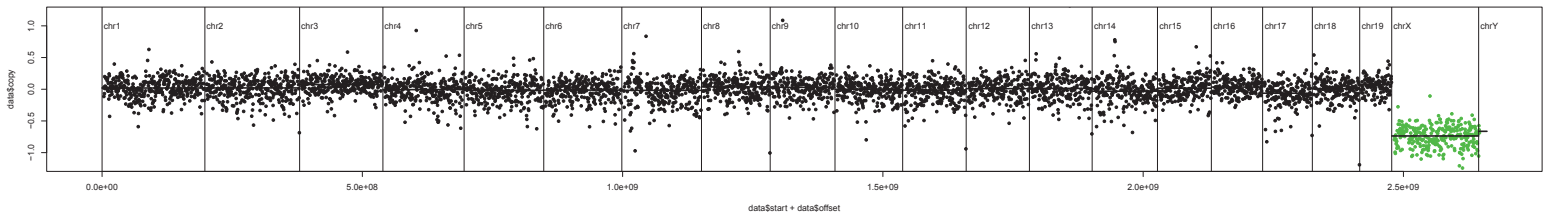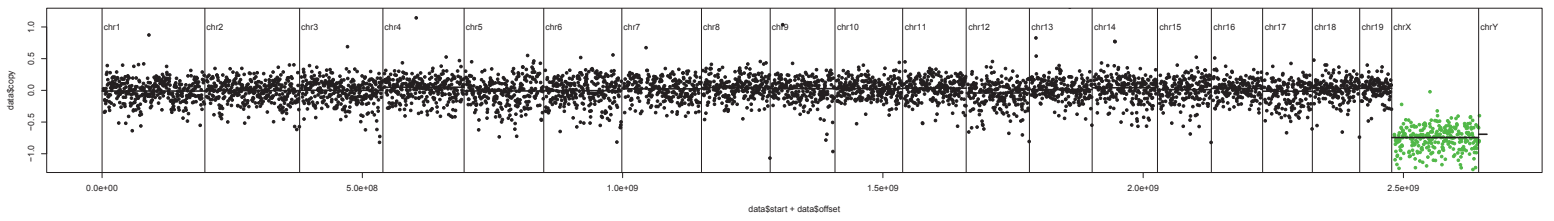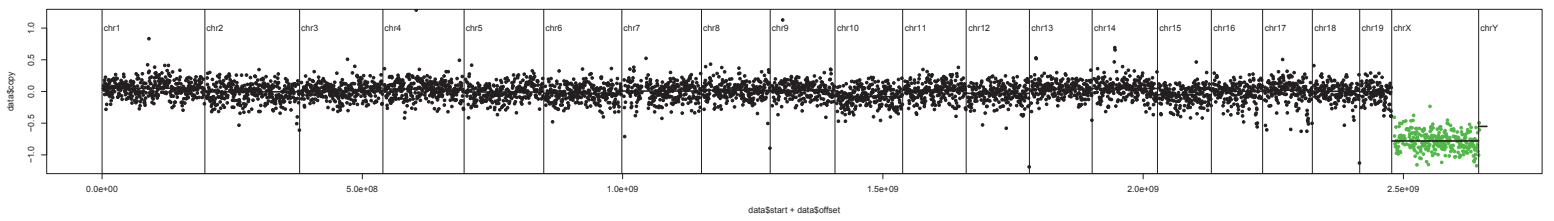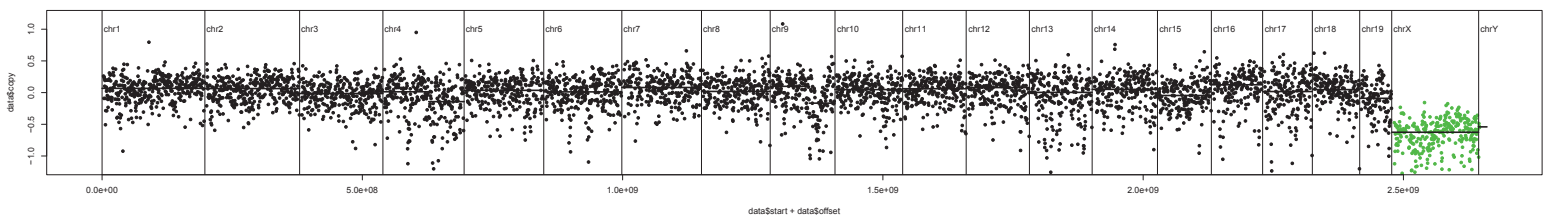

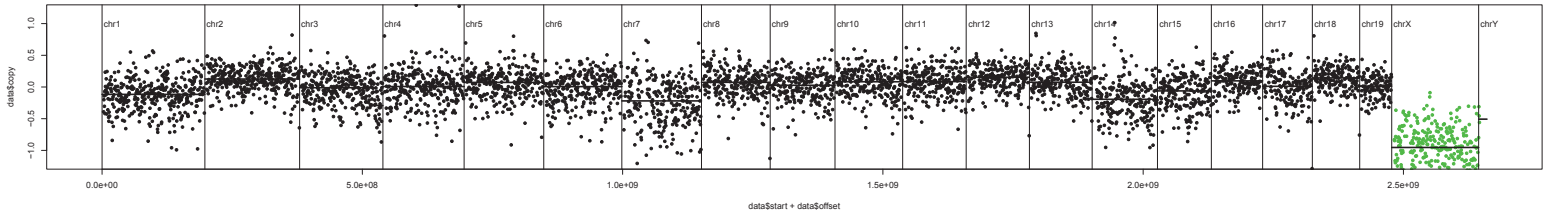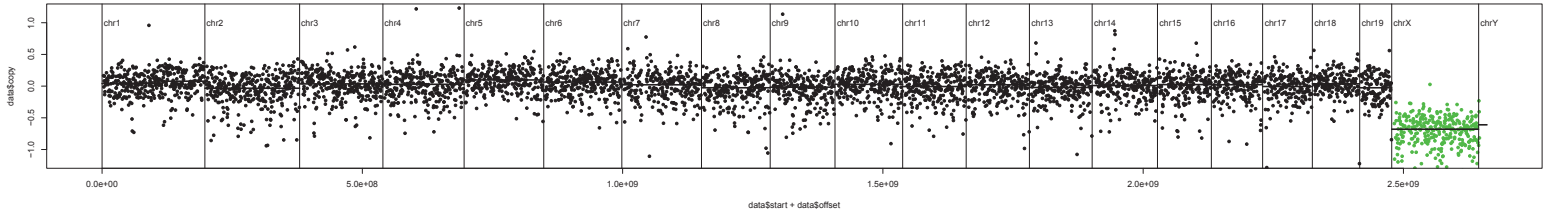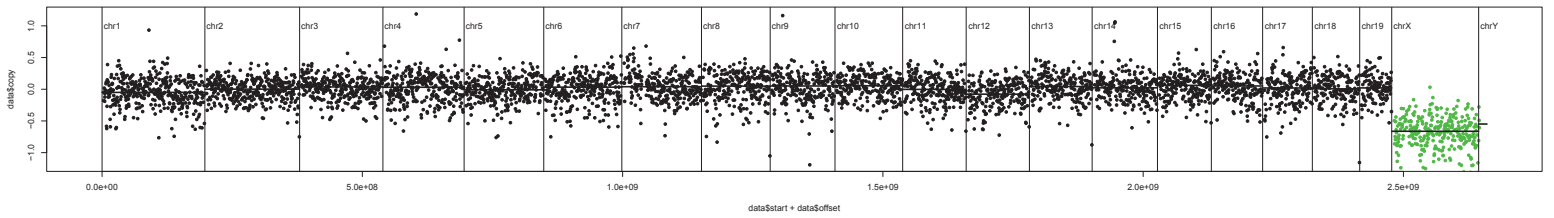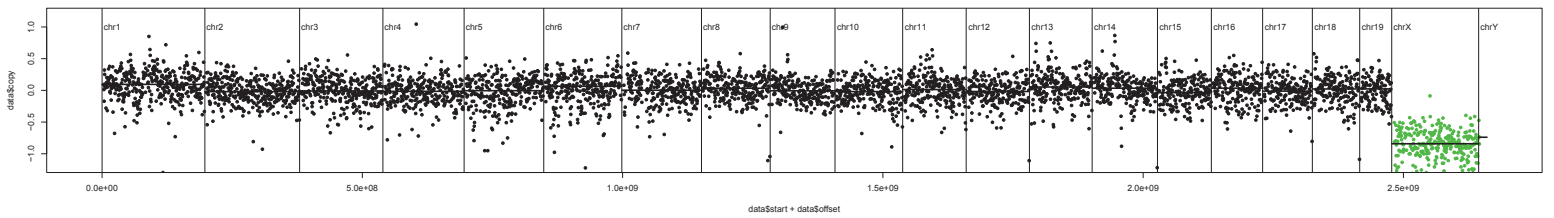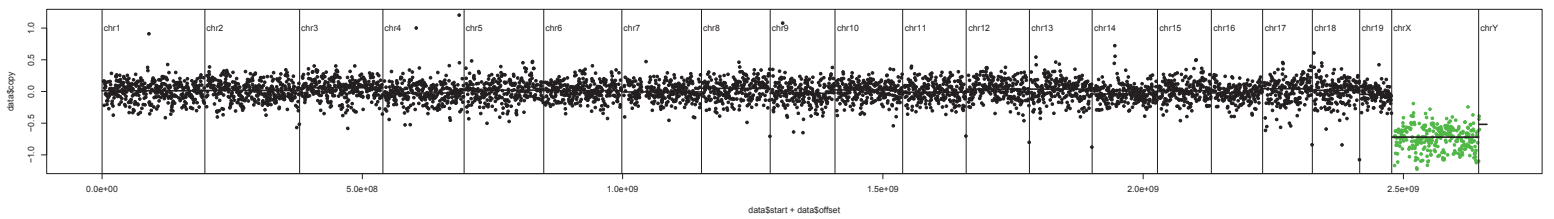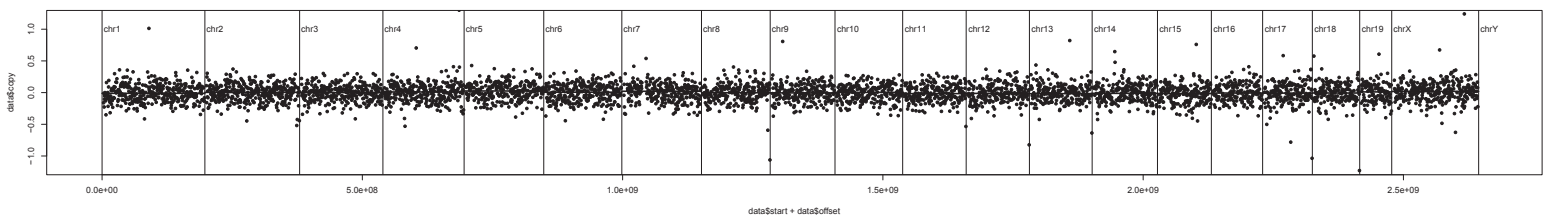

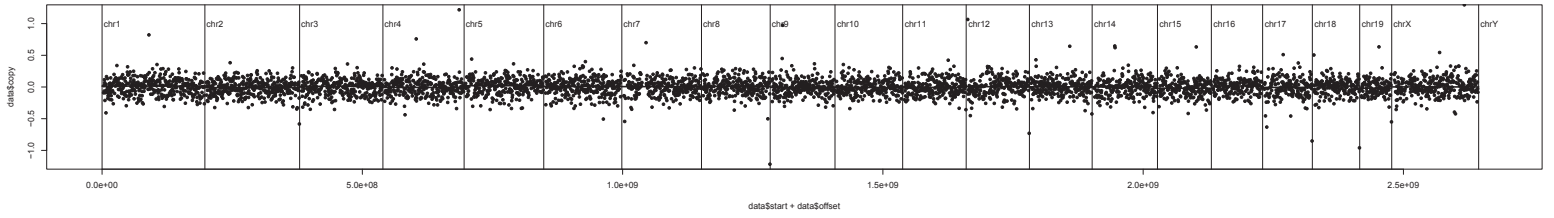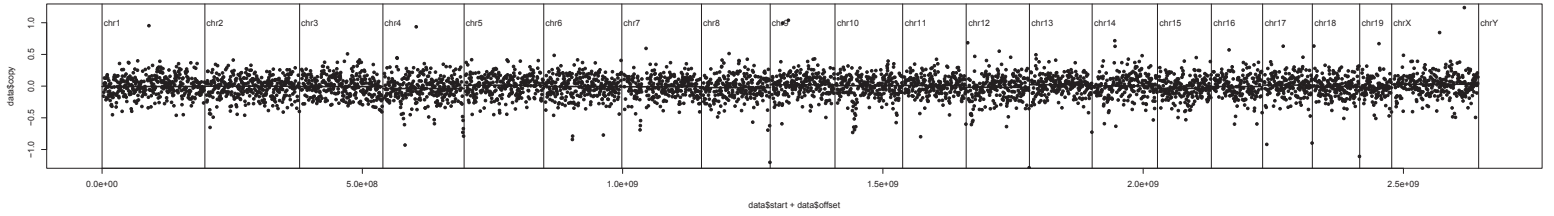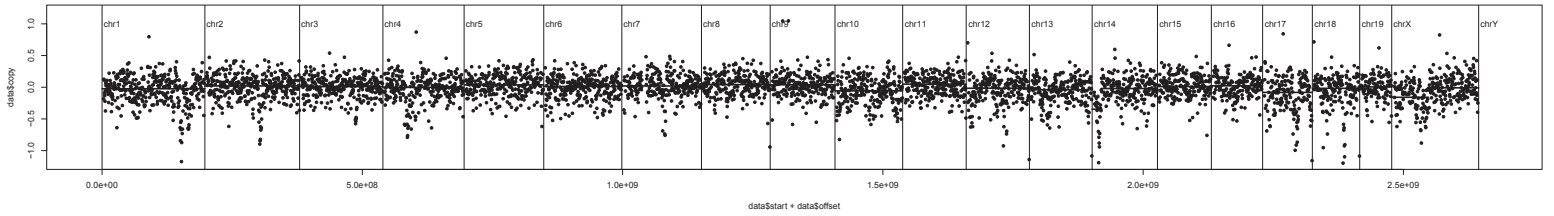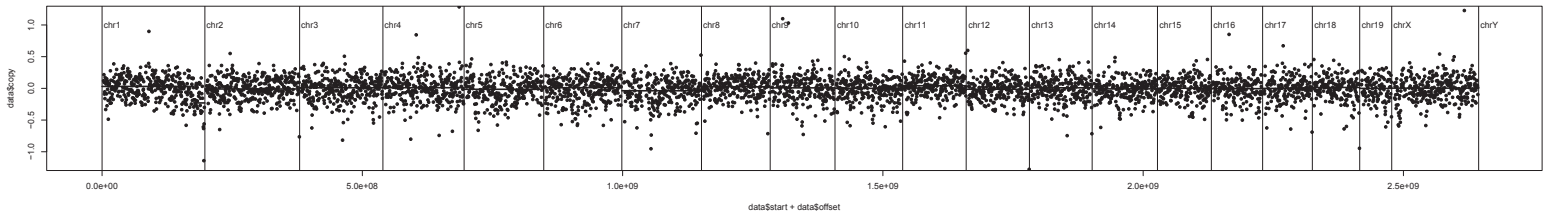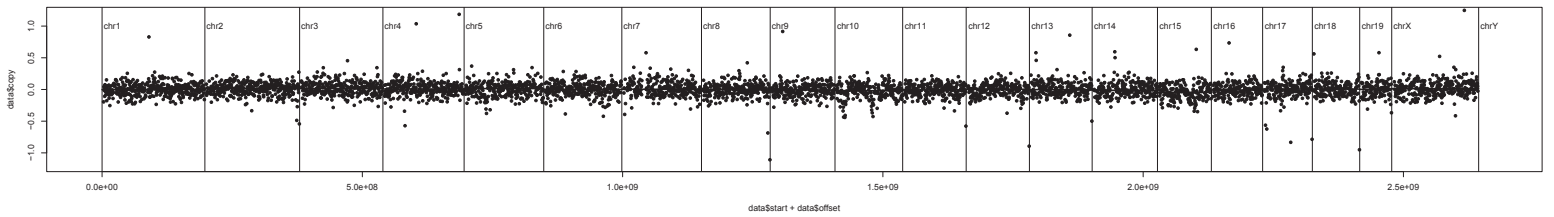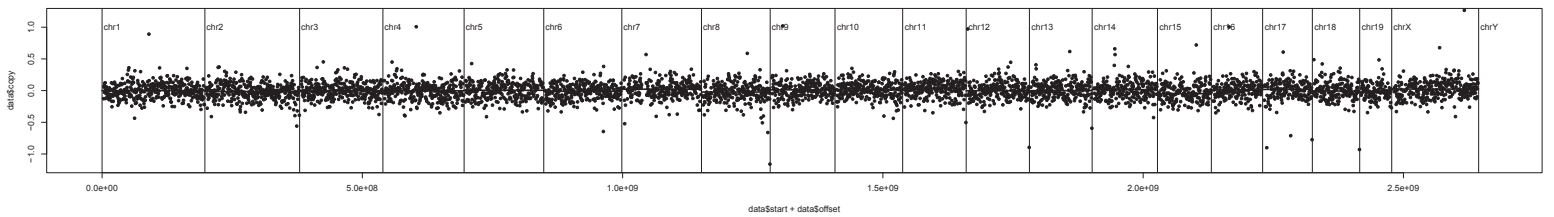

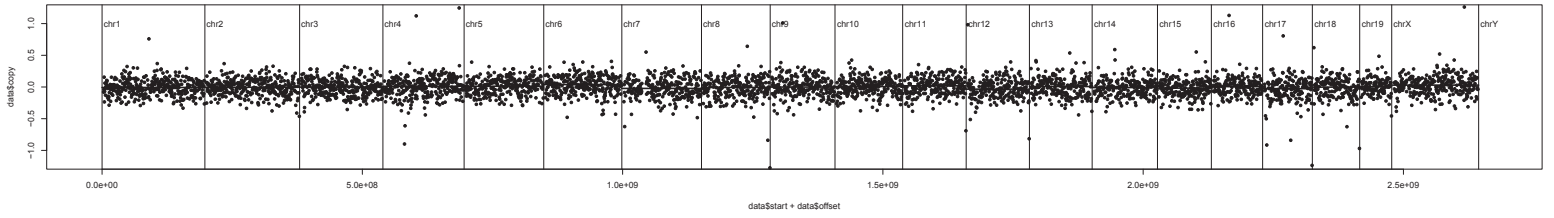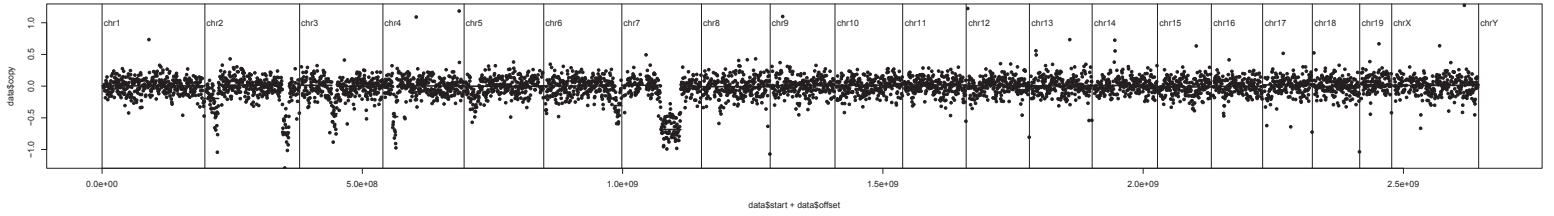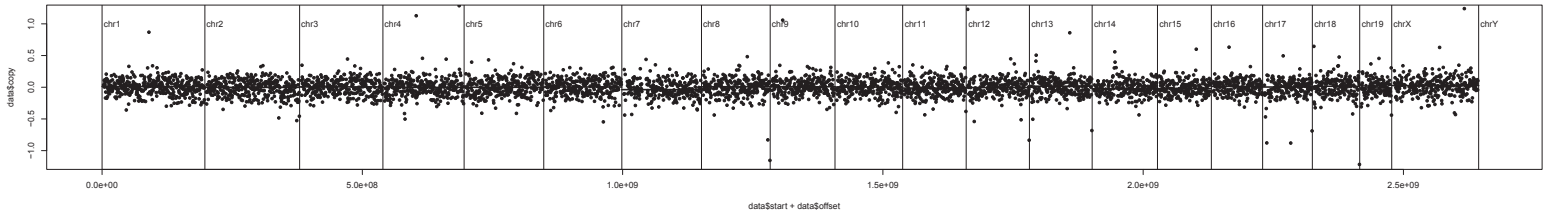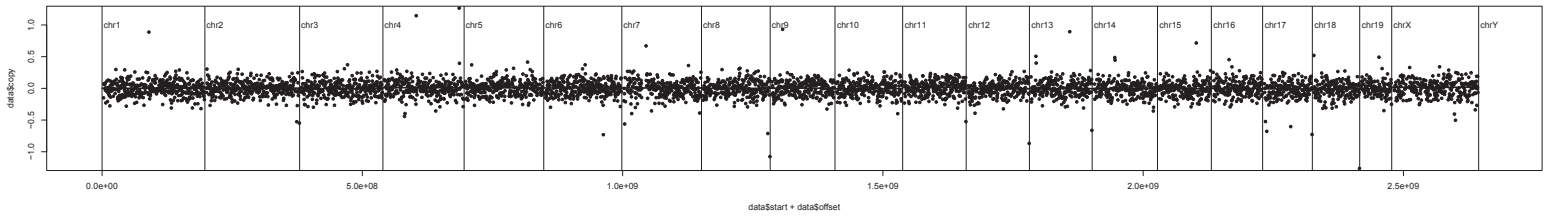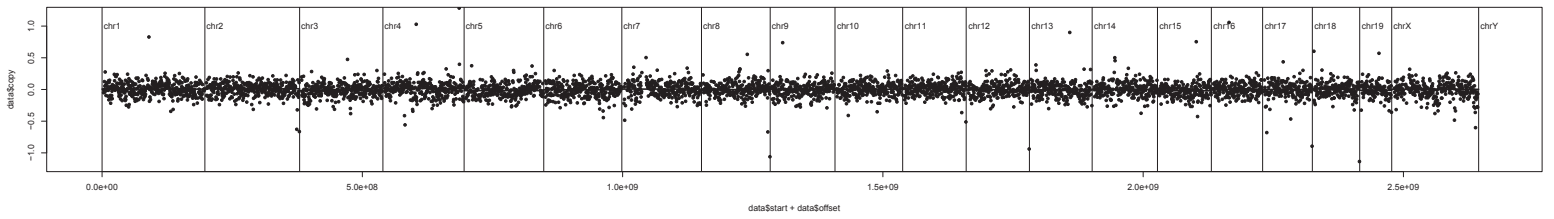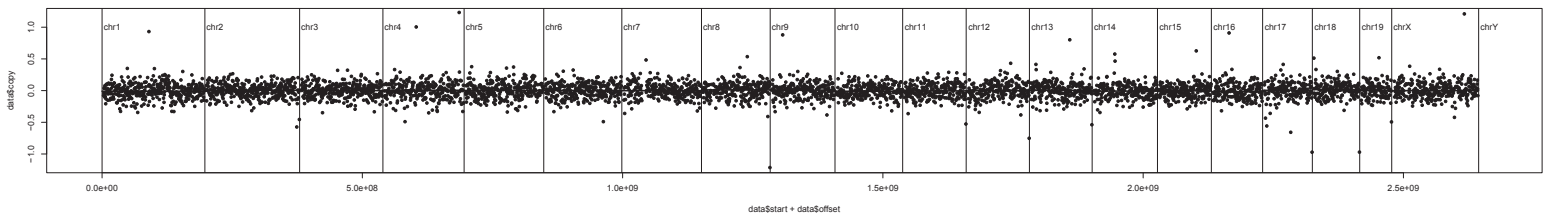

# Mouse Brain Cells

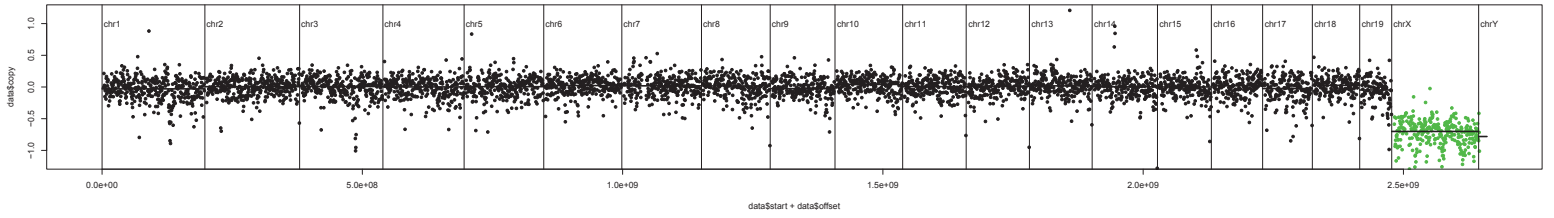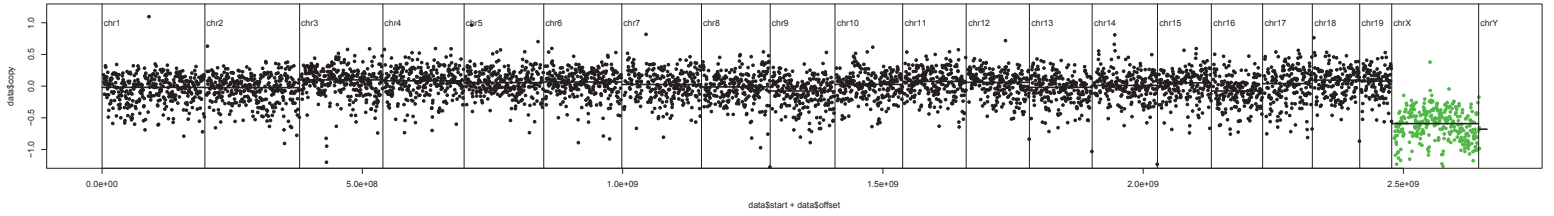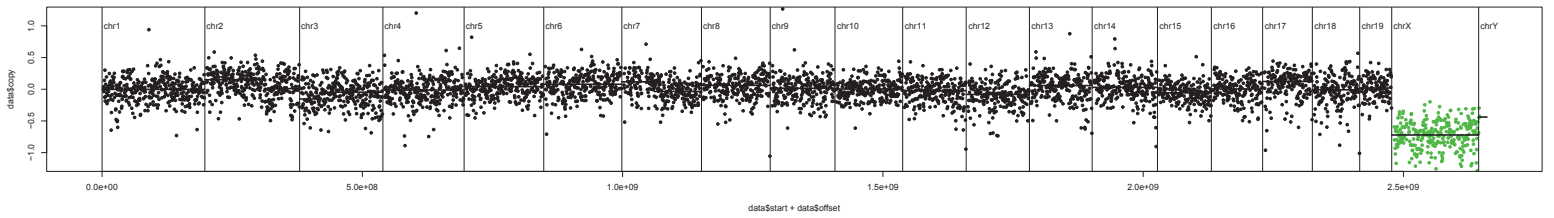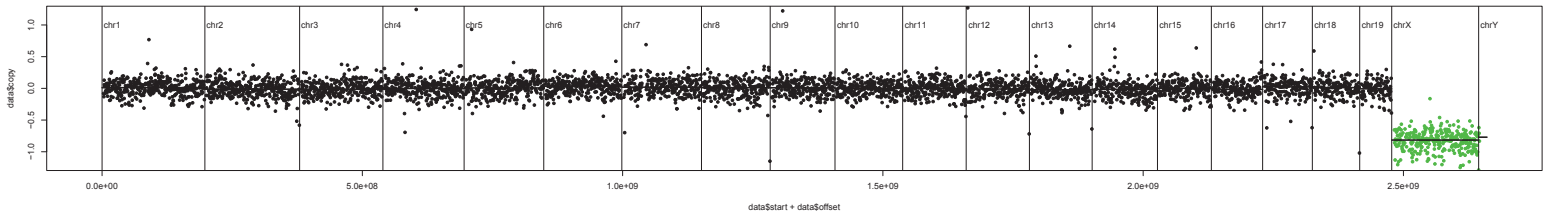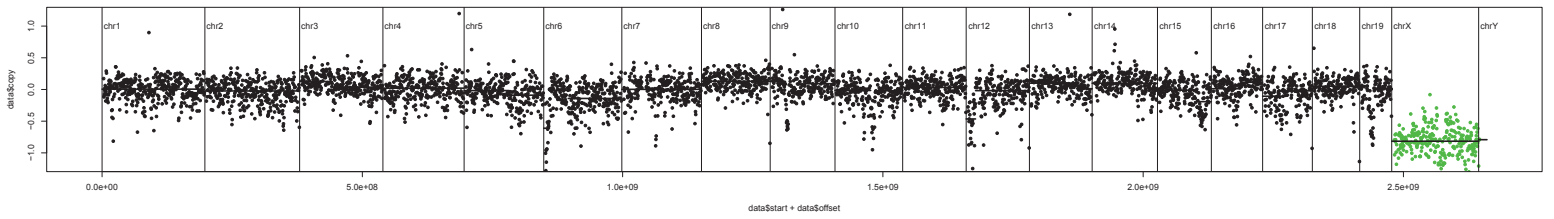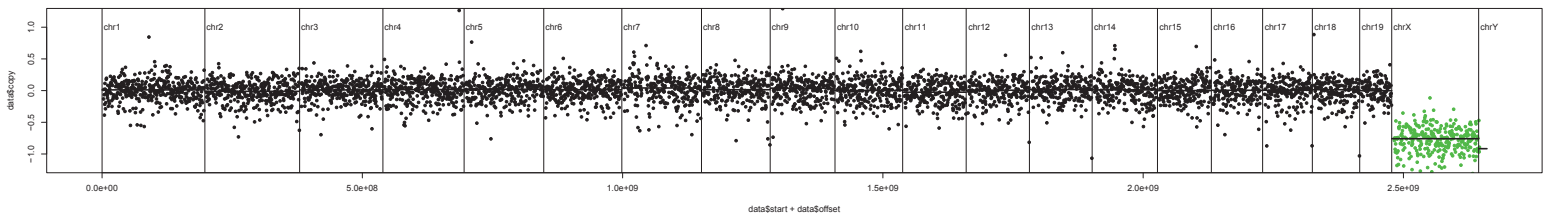

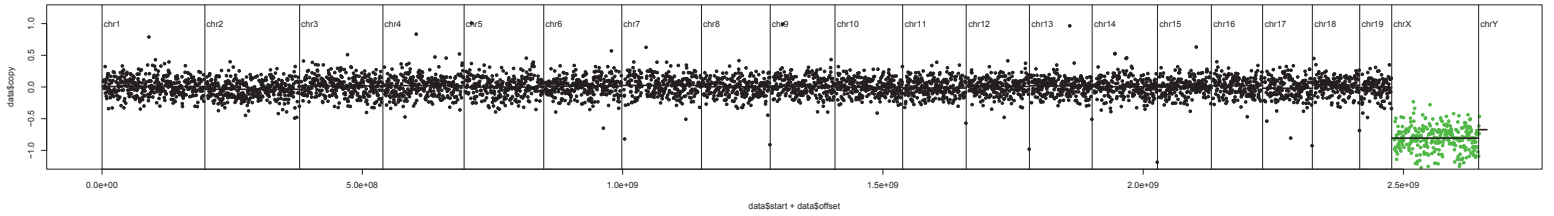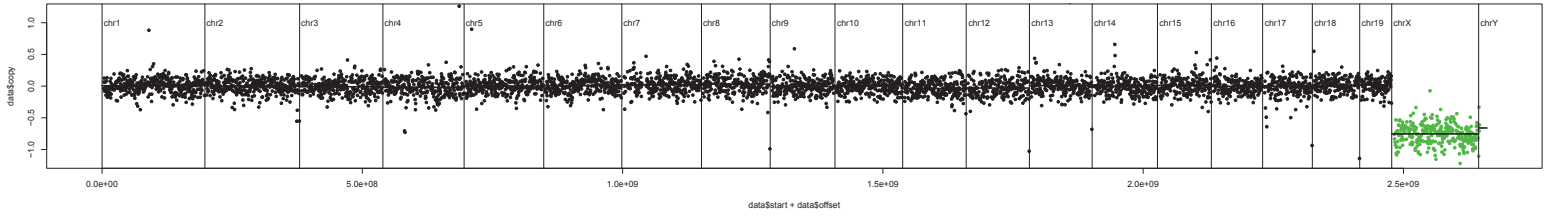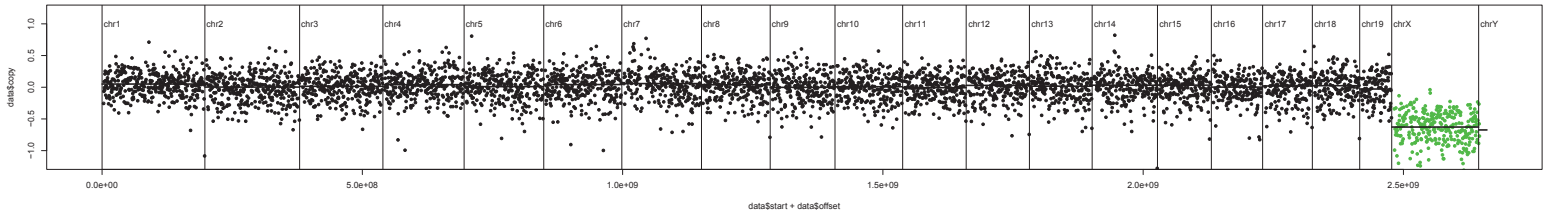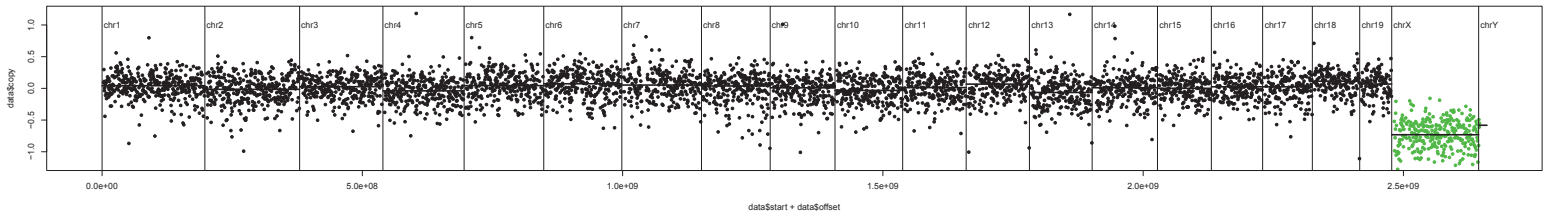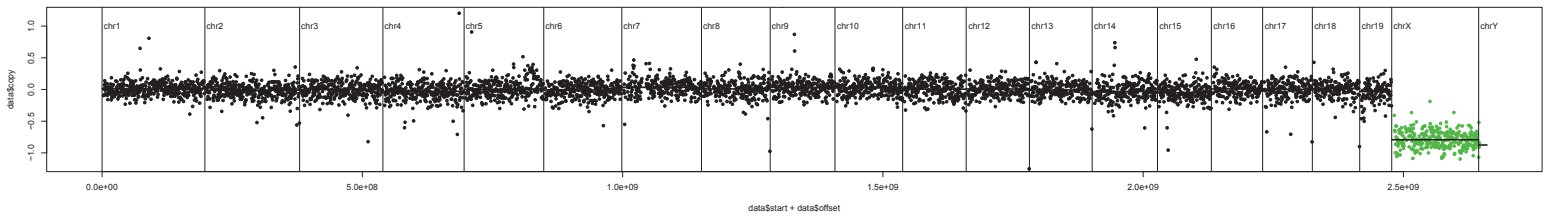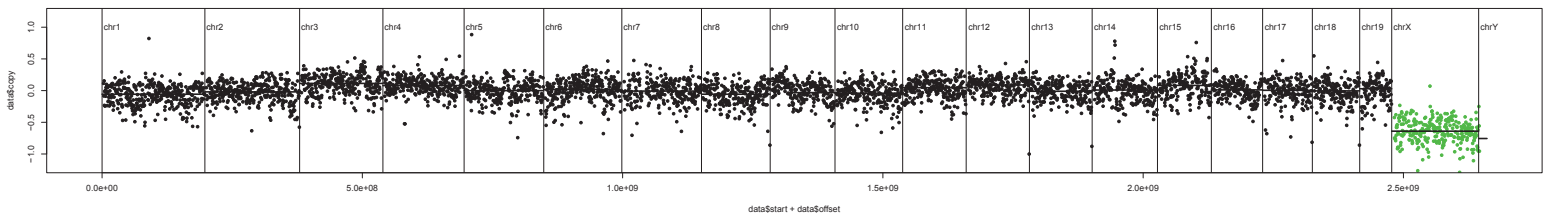

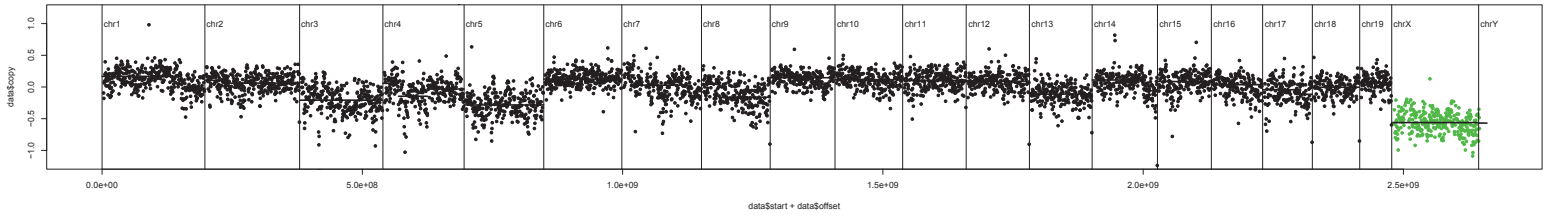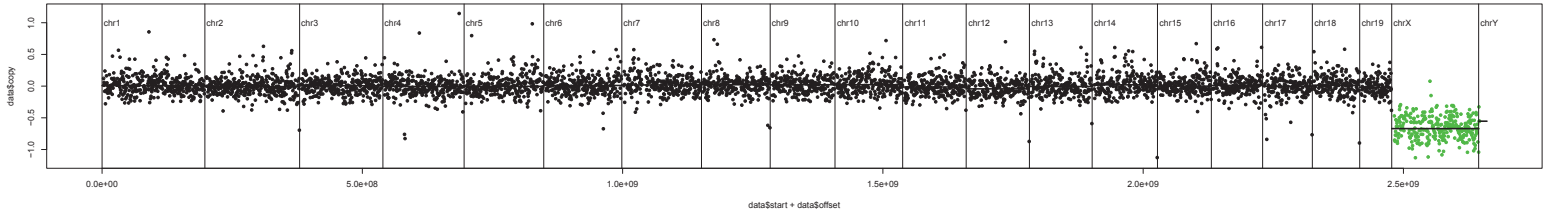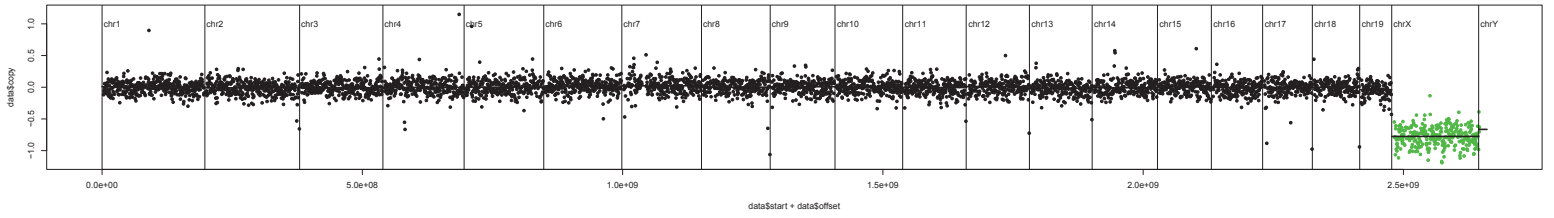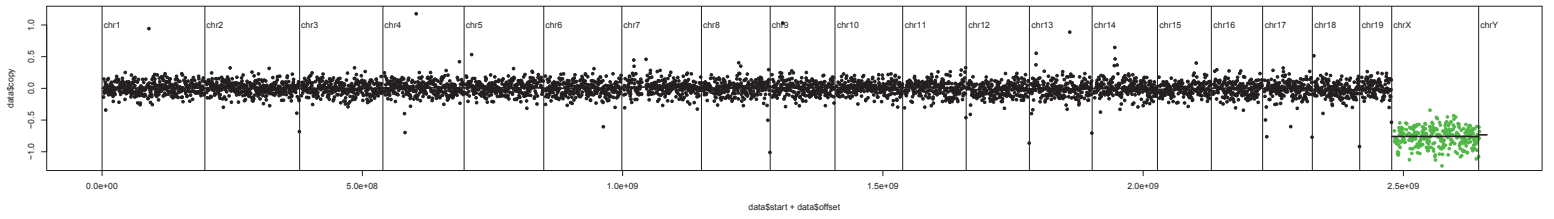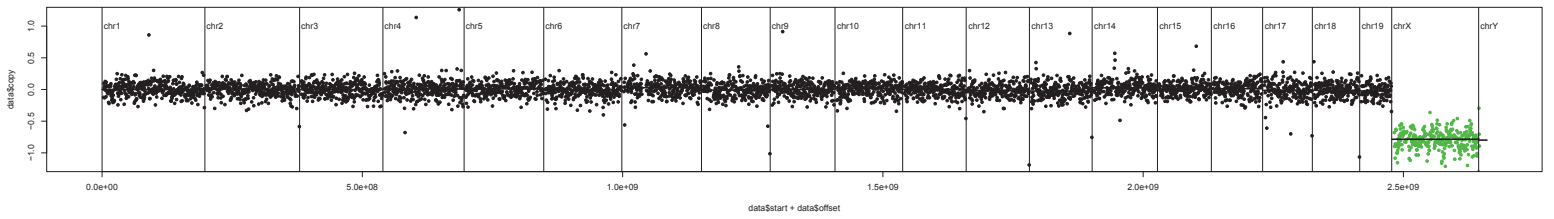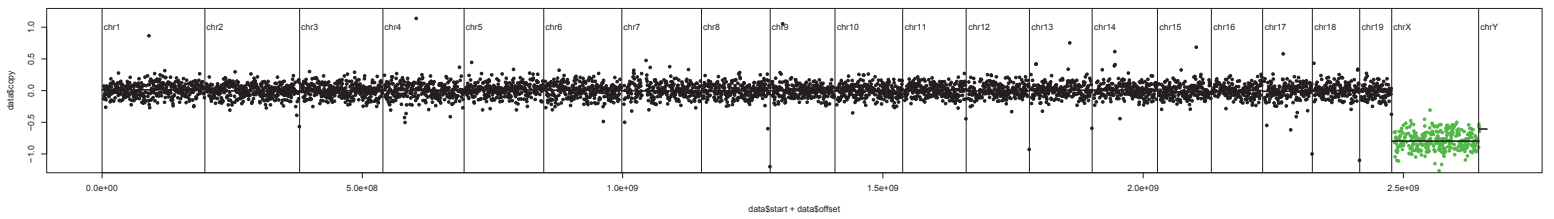



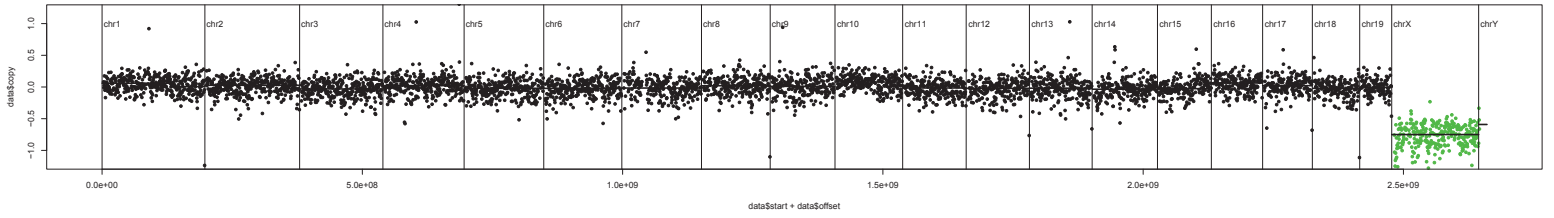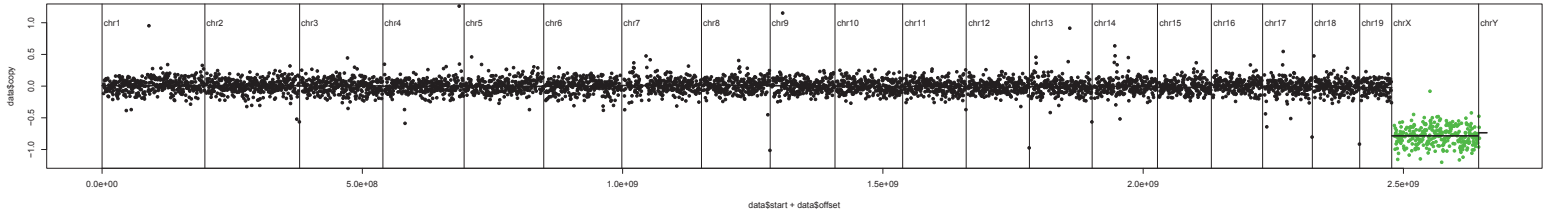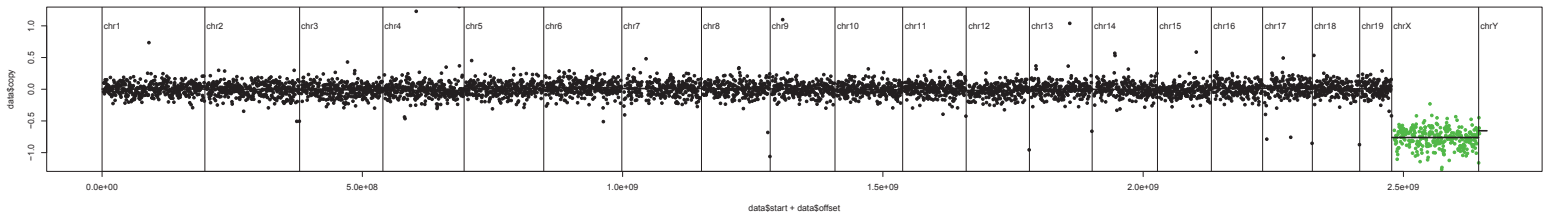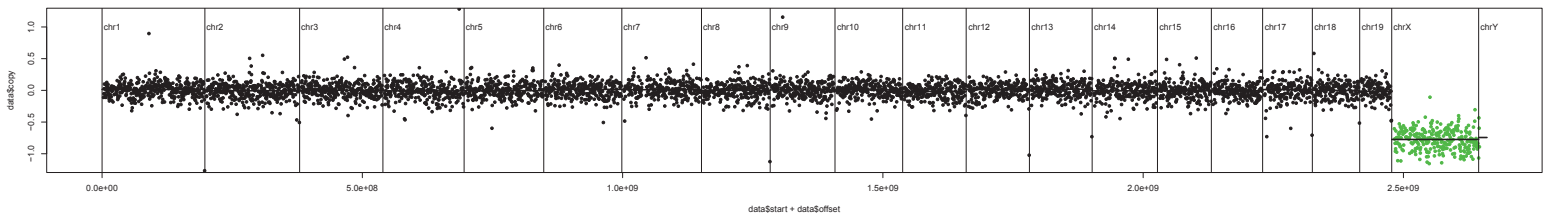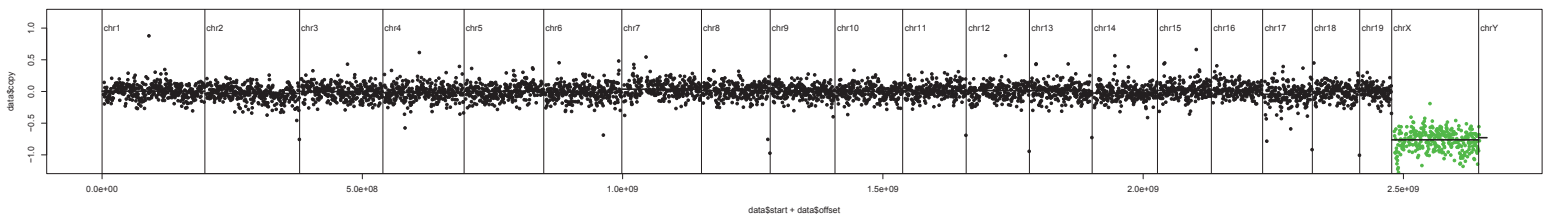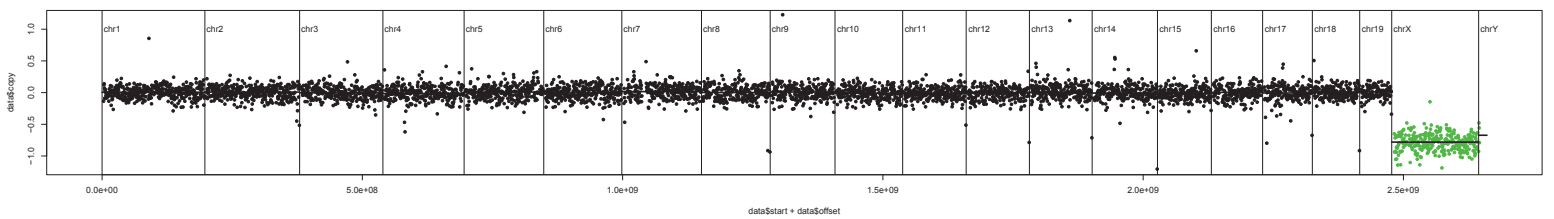

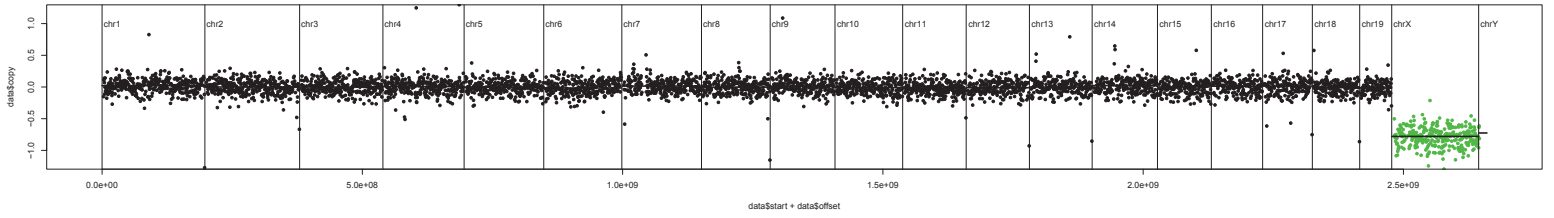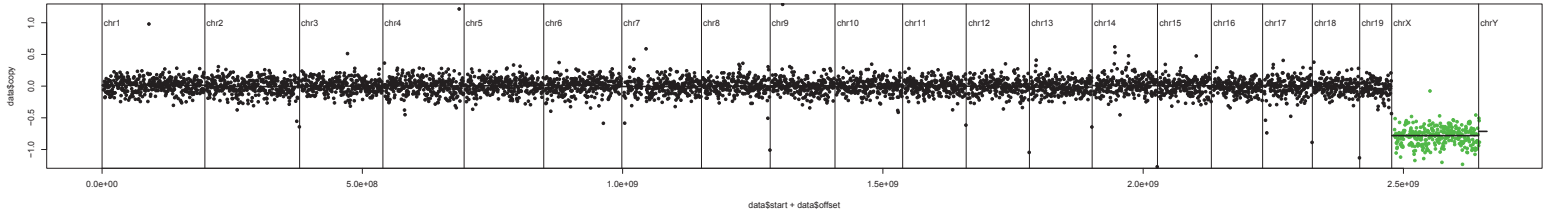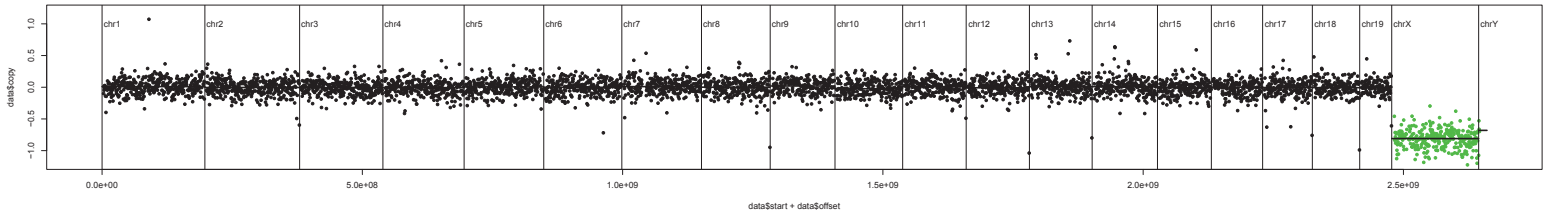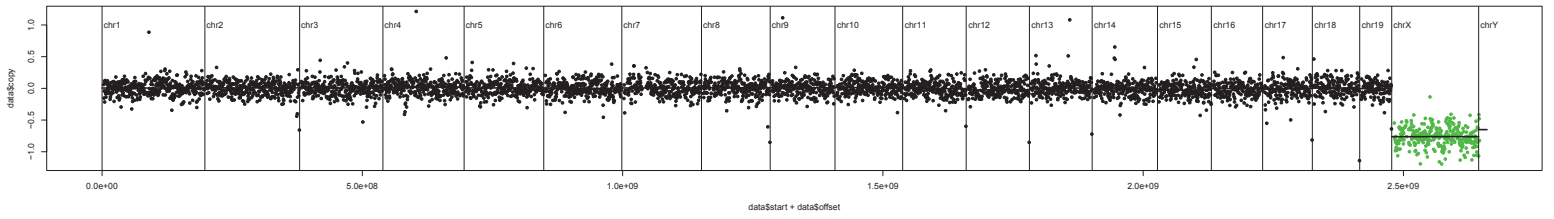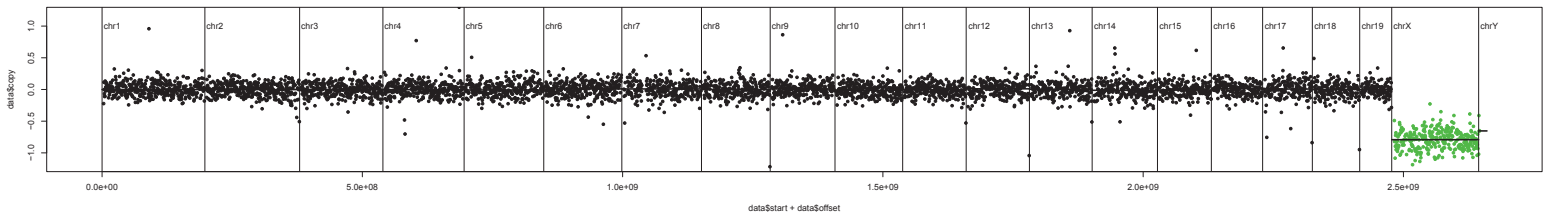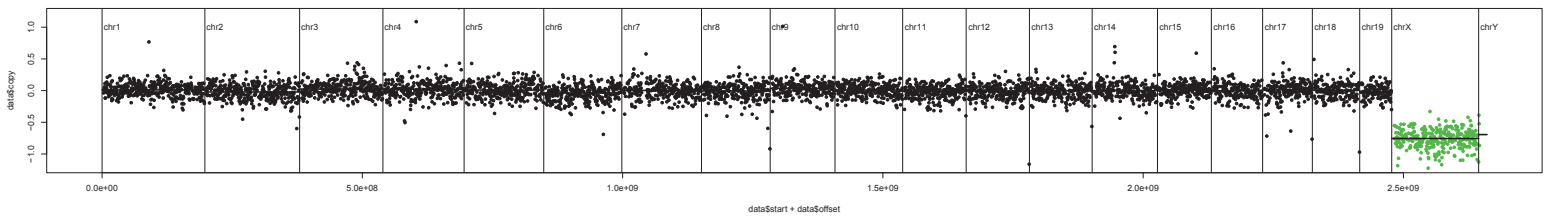

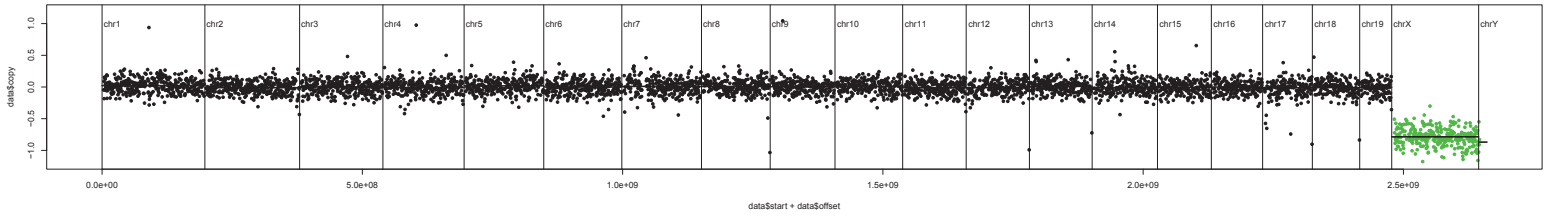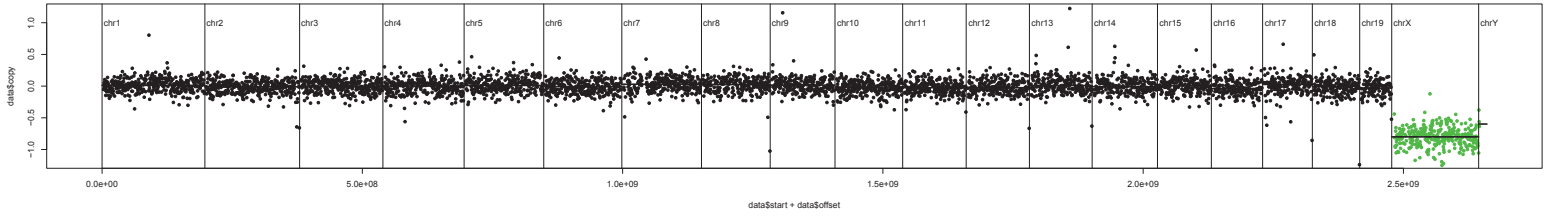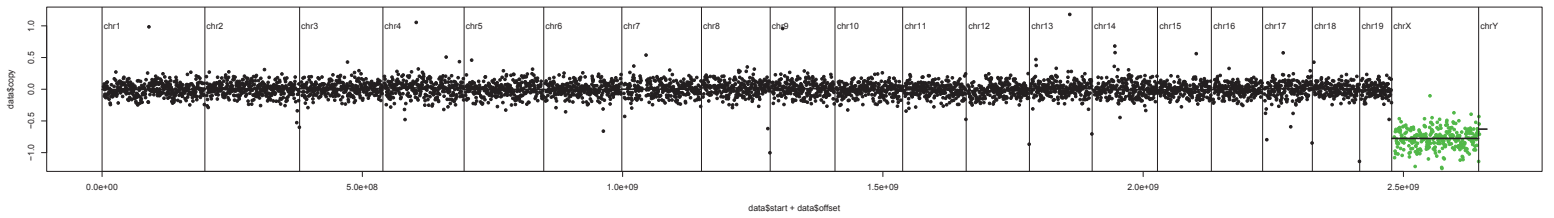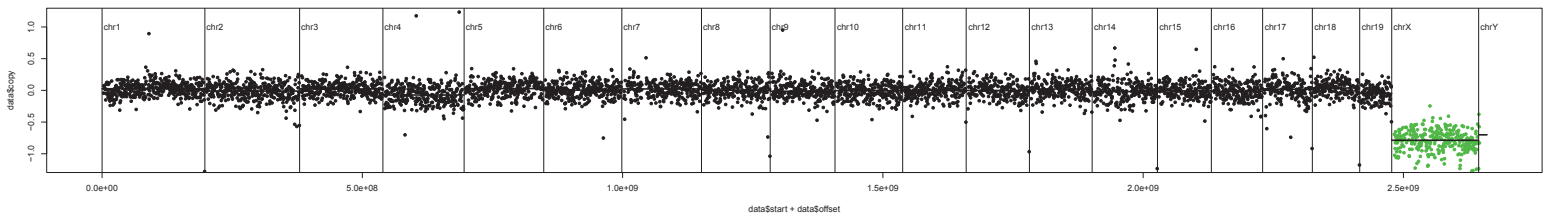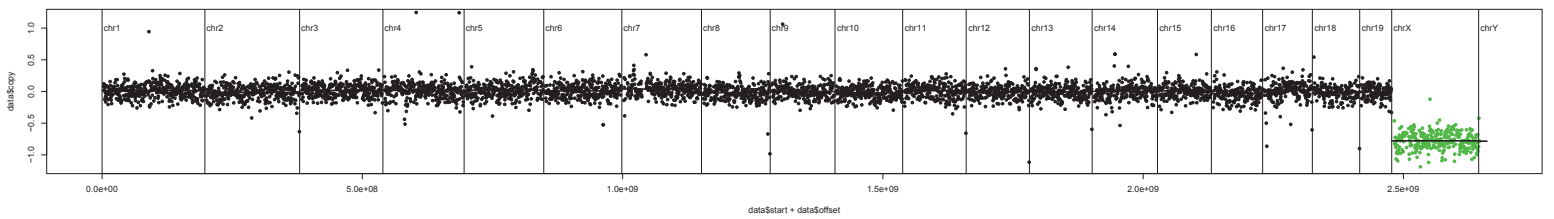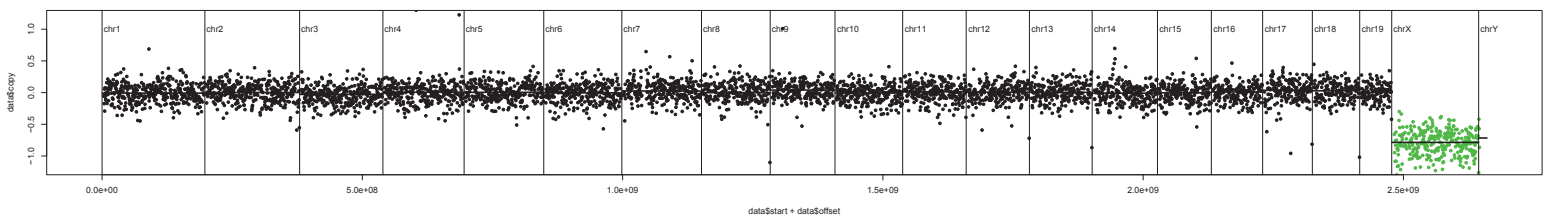

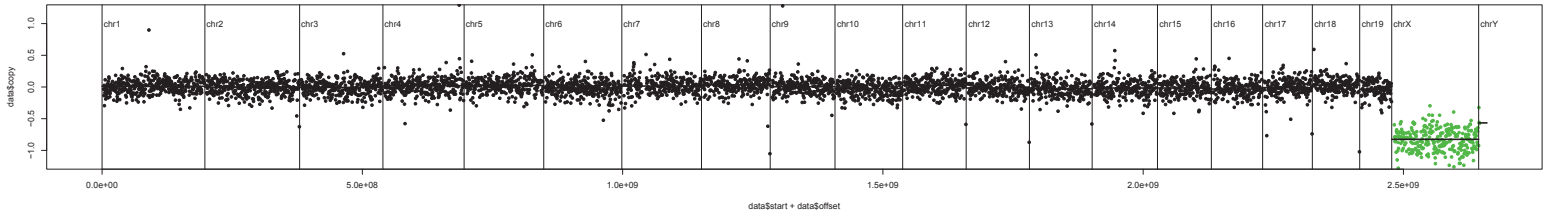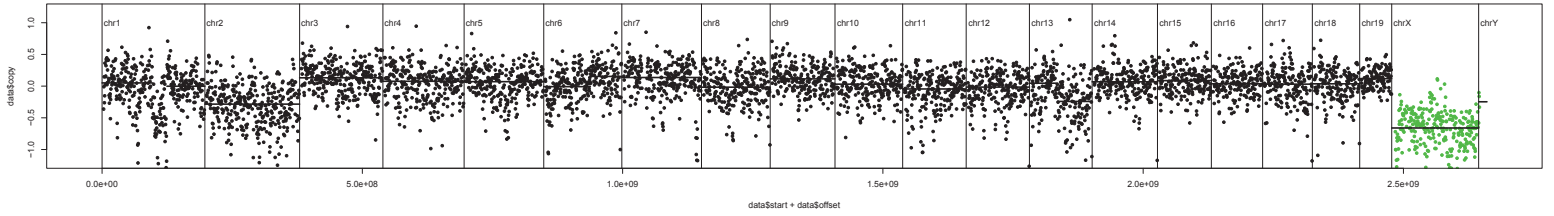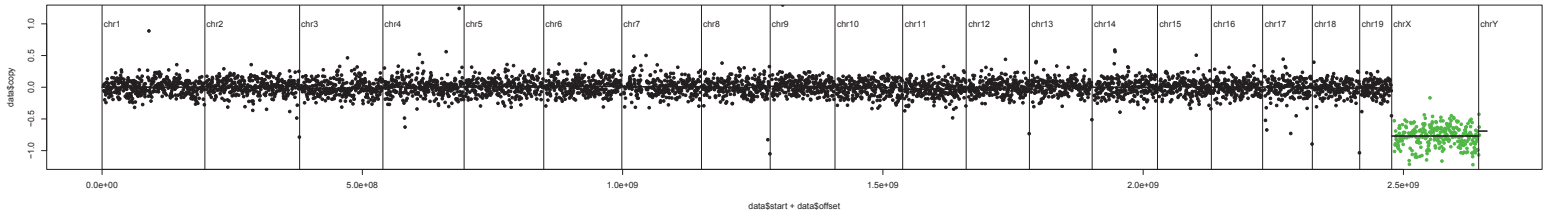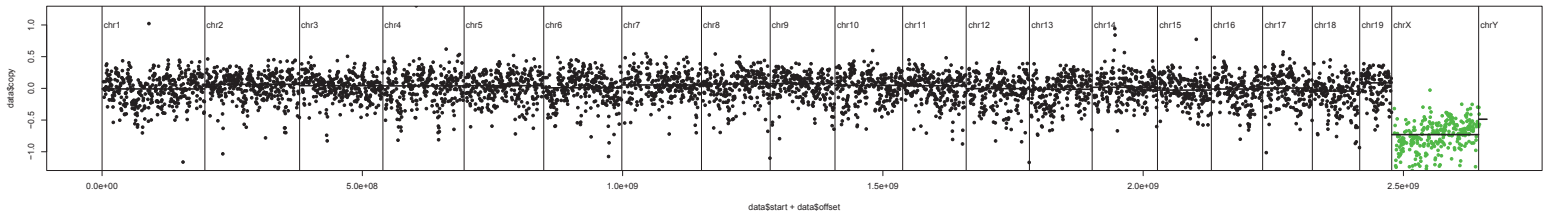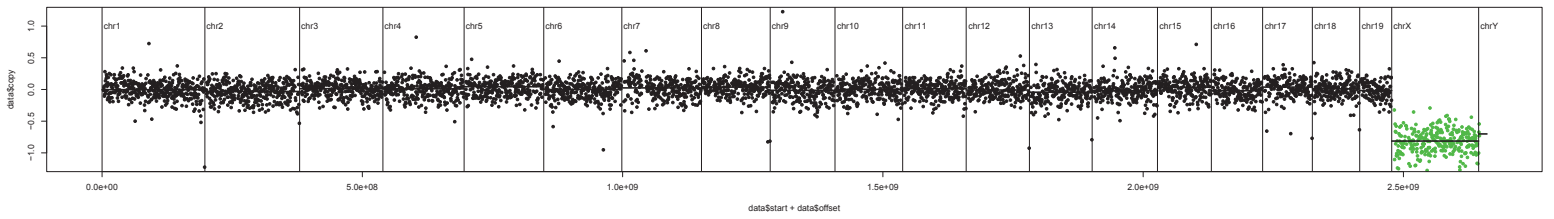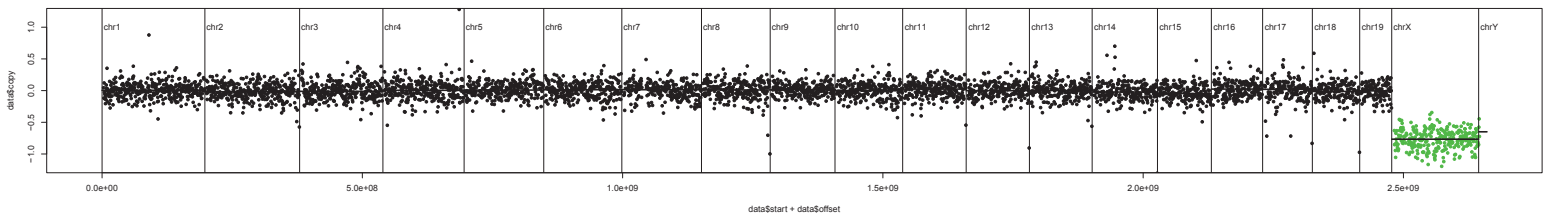

# Mouse Neurons

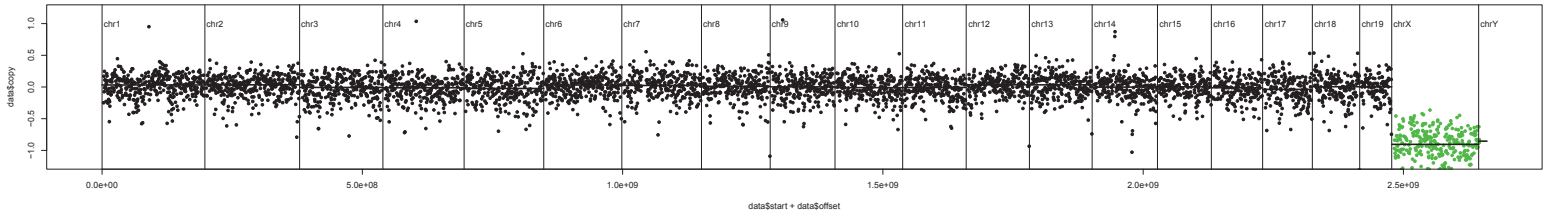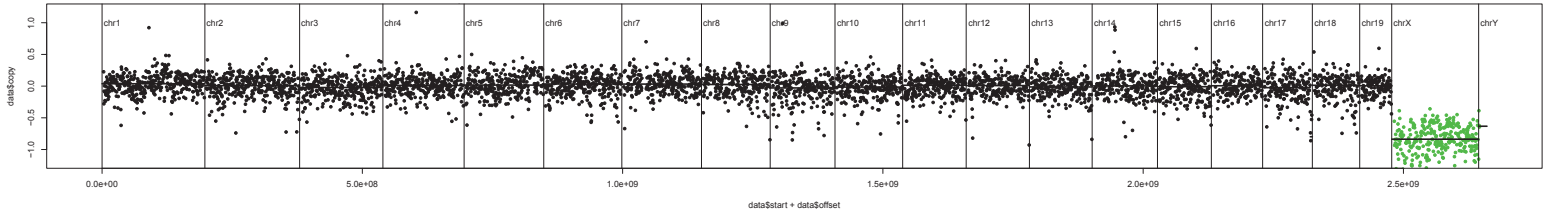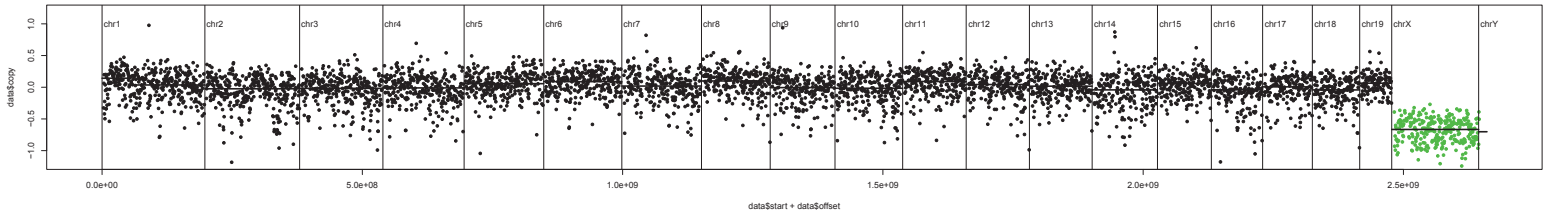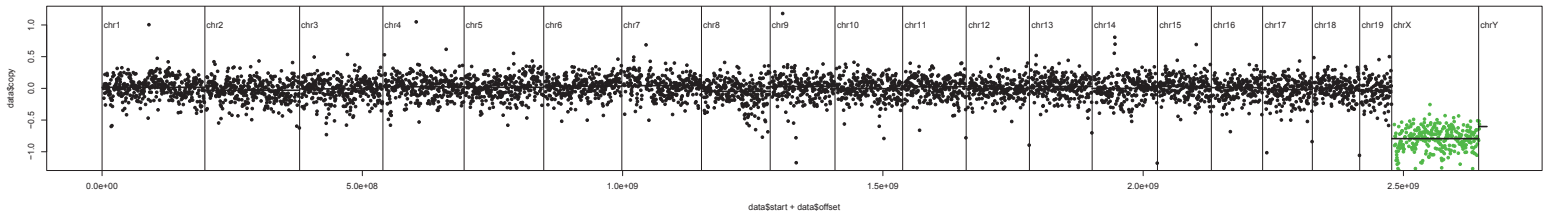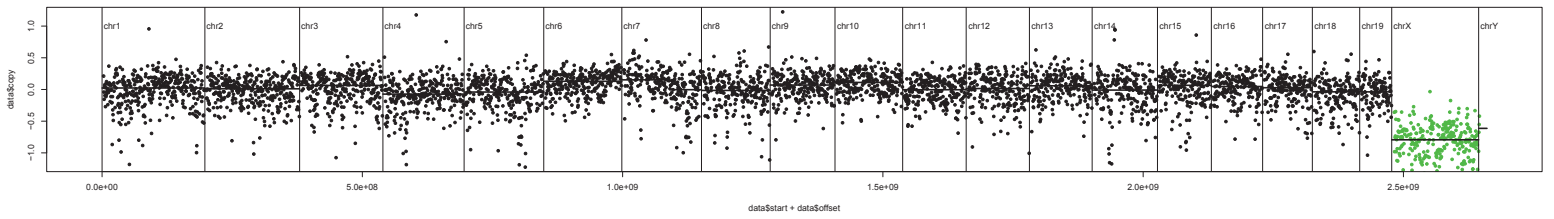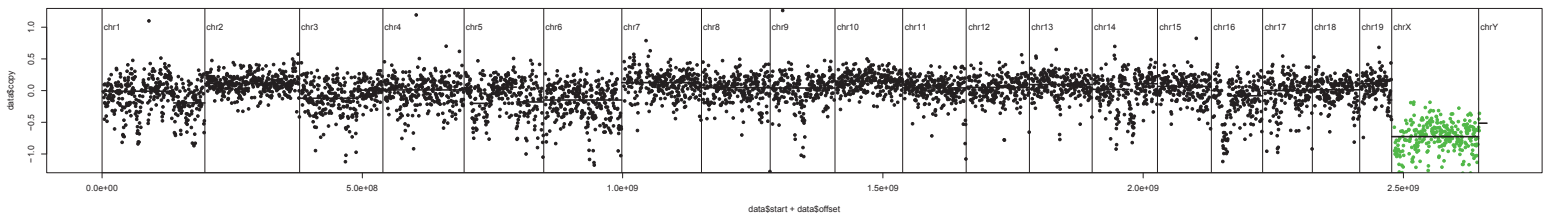

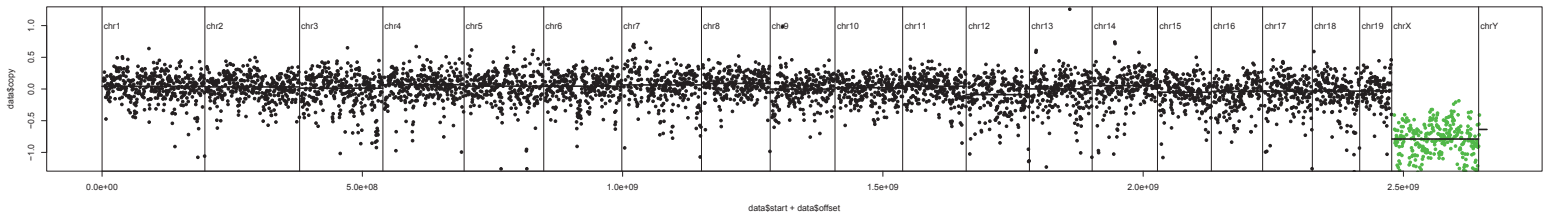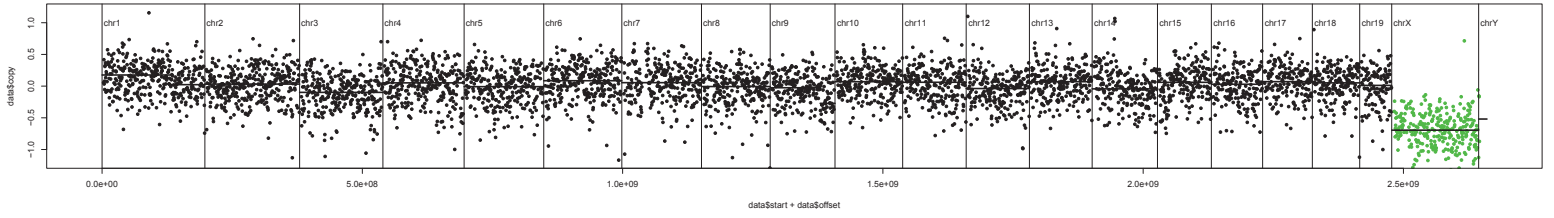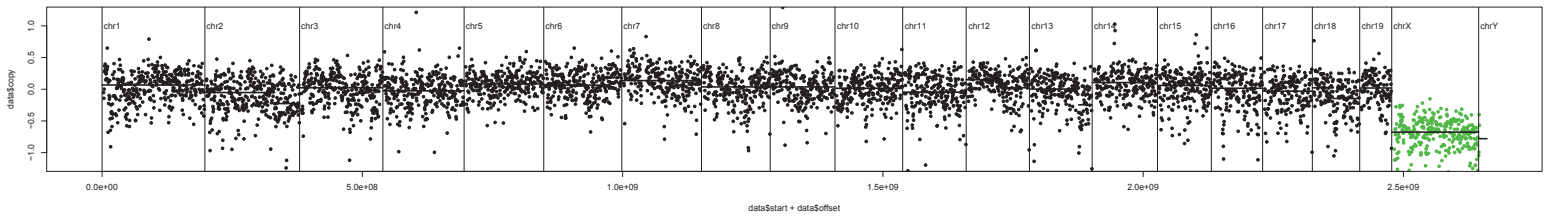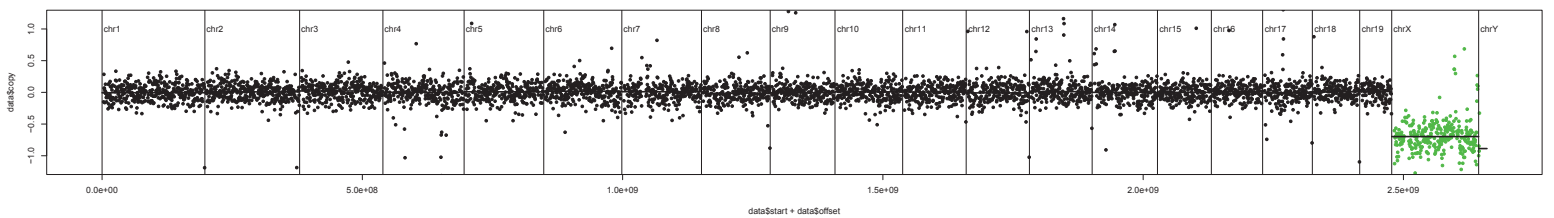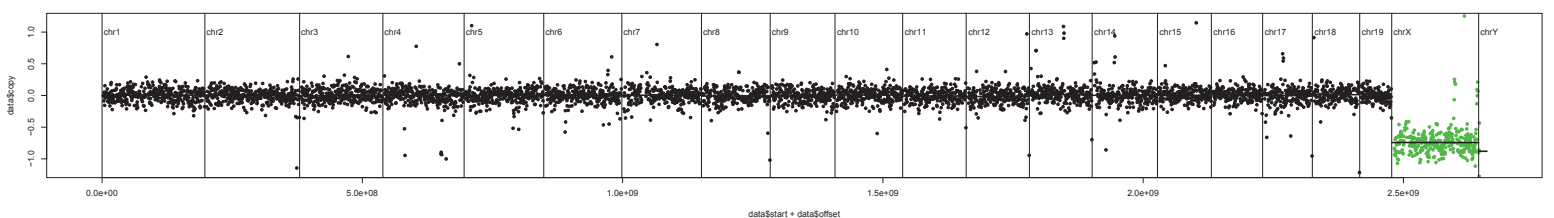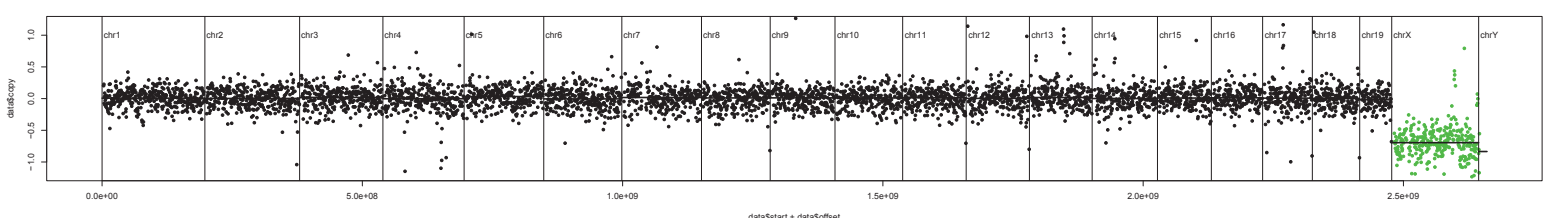

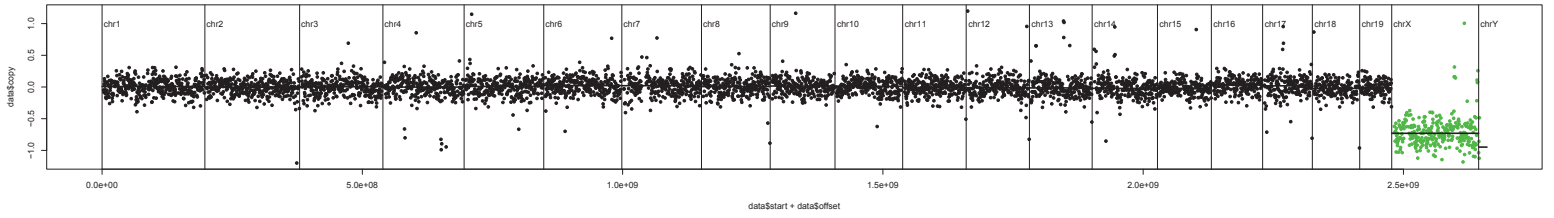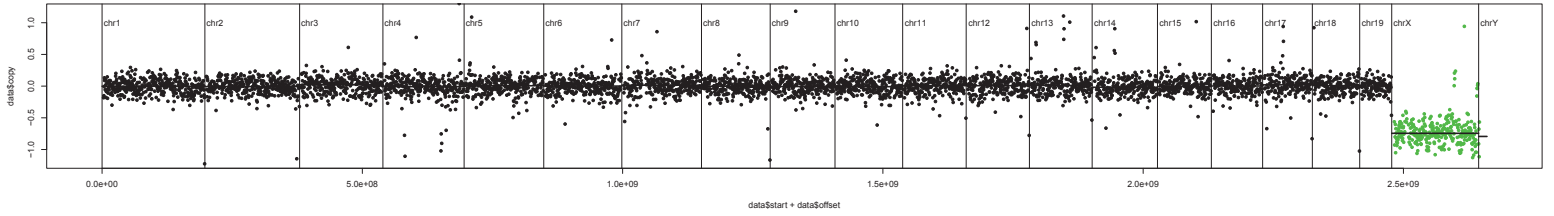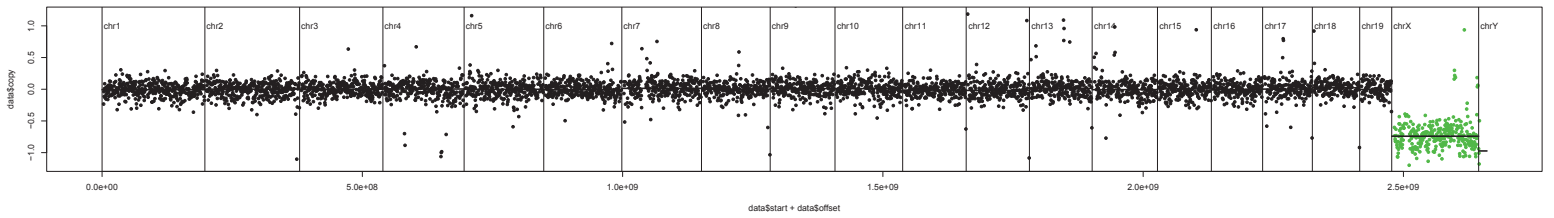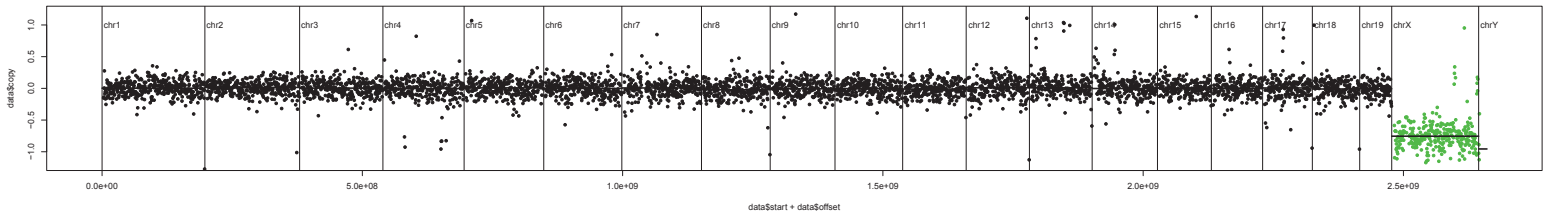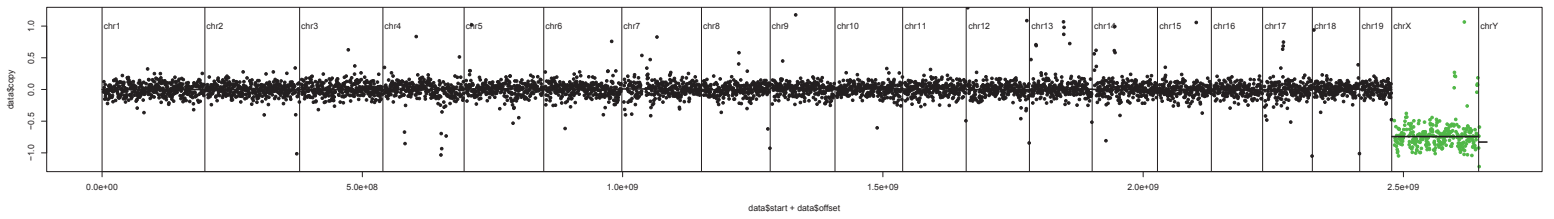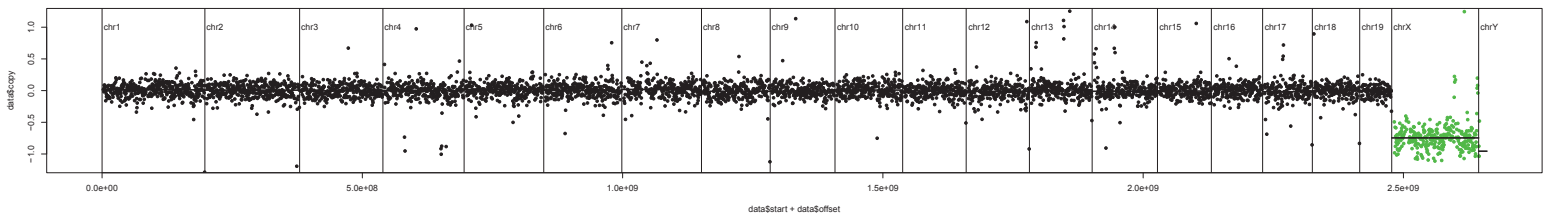

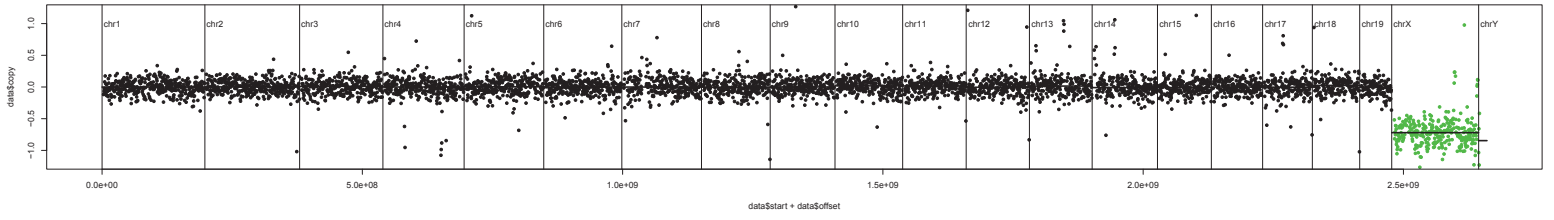



# Human Brain Cells

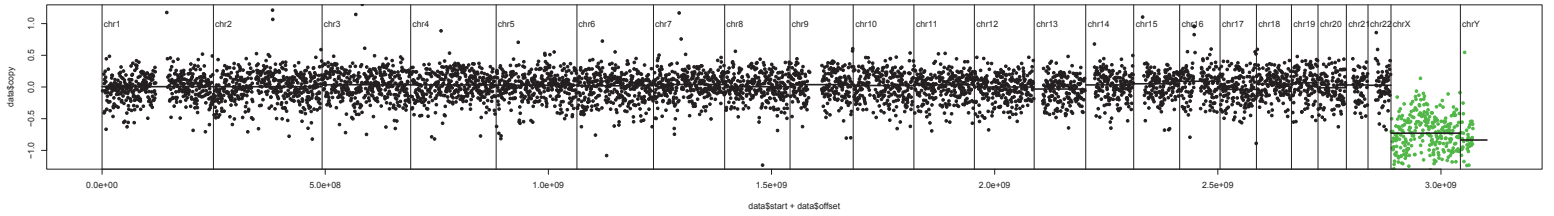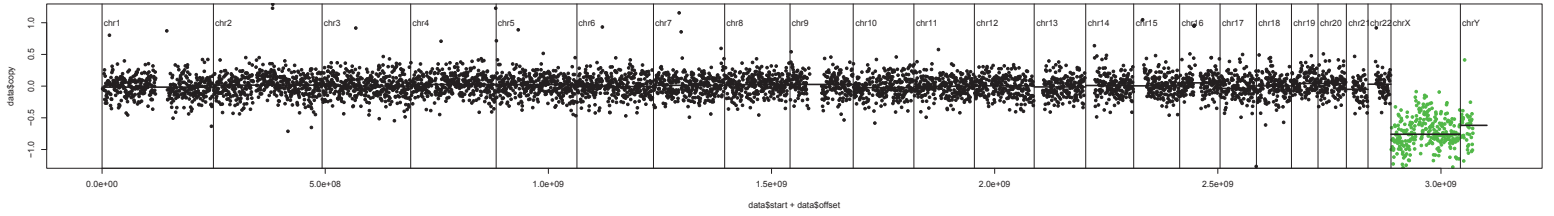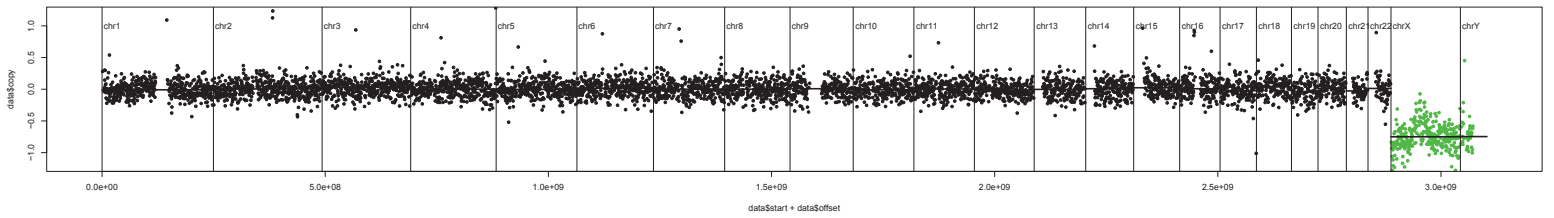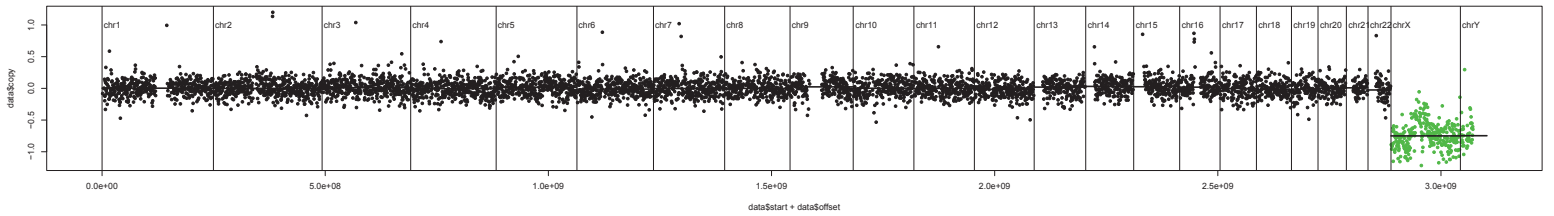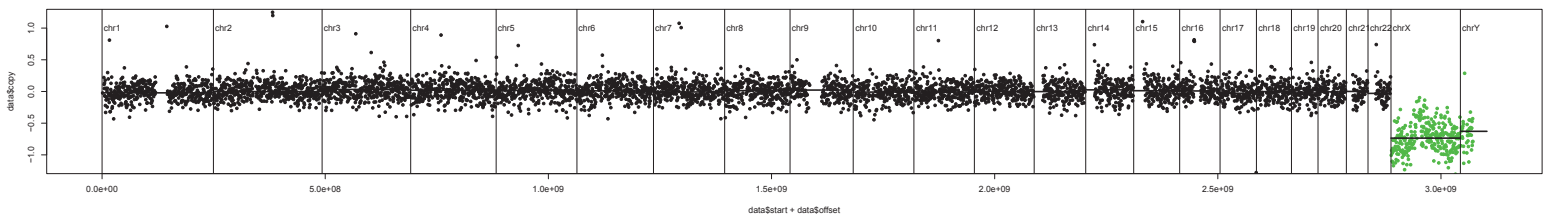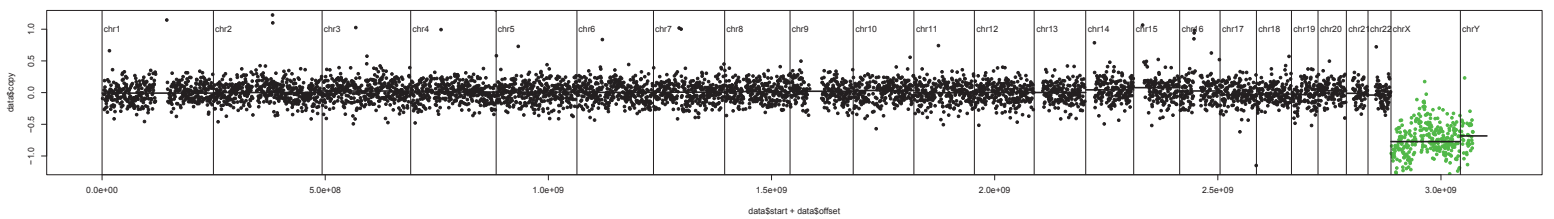

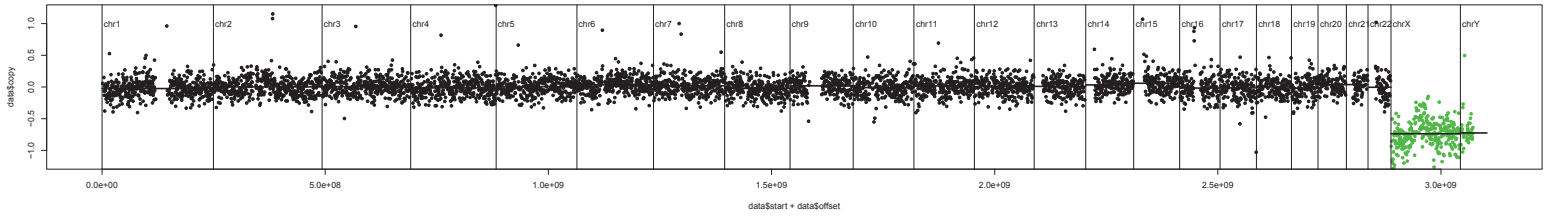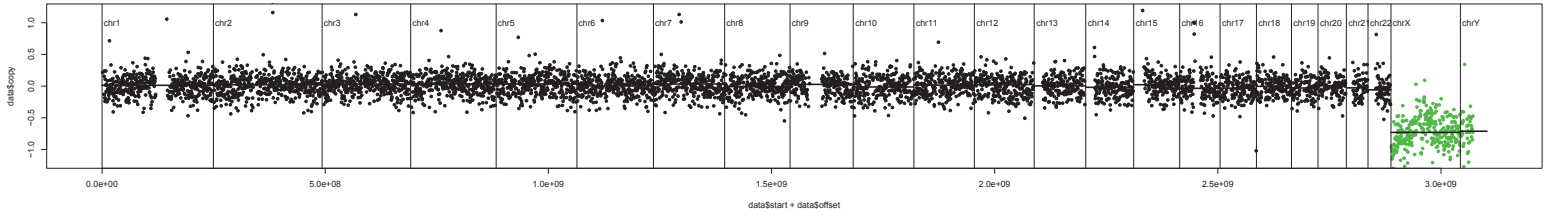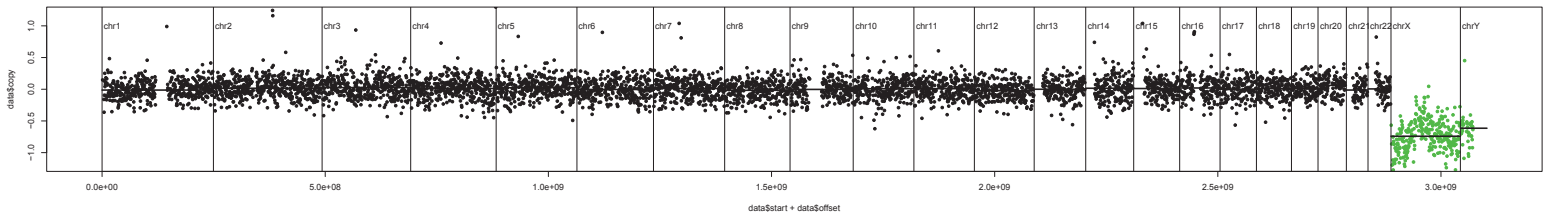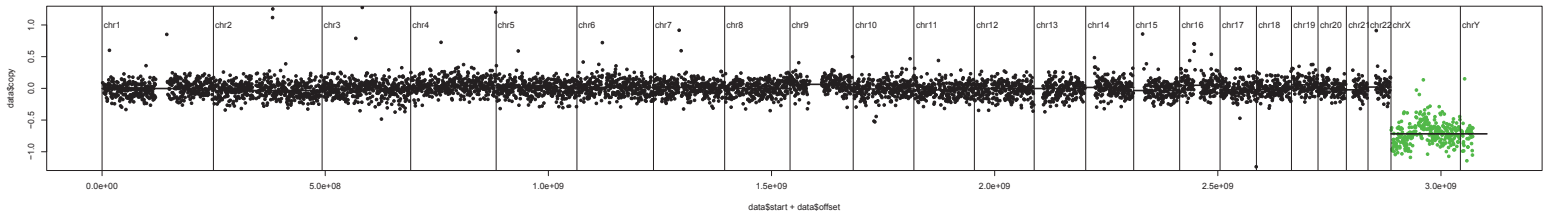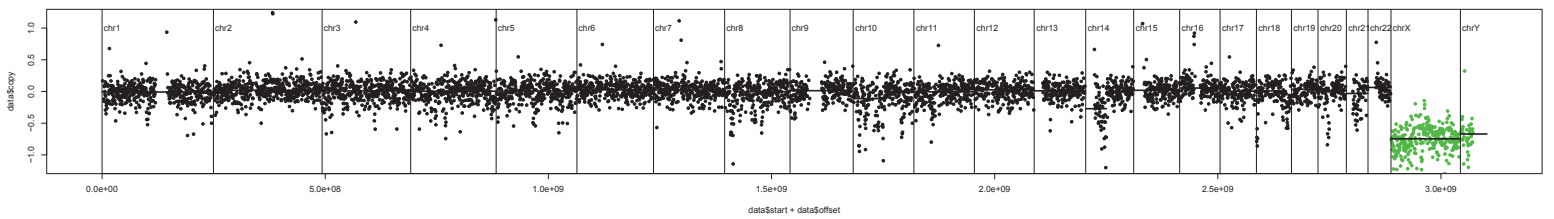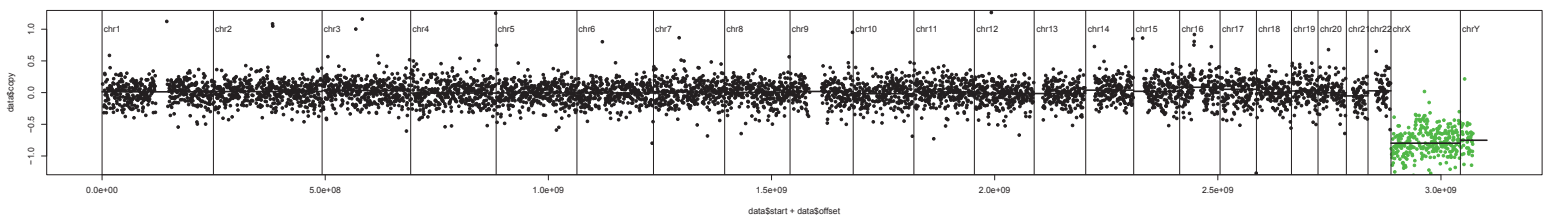

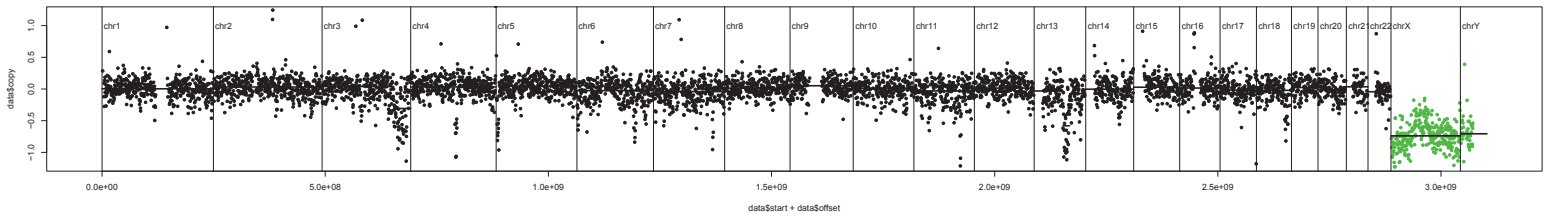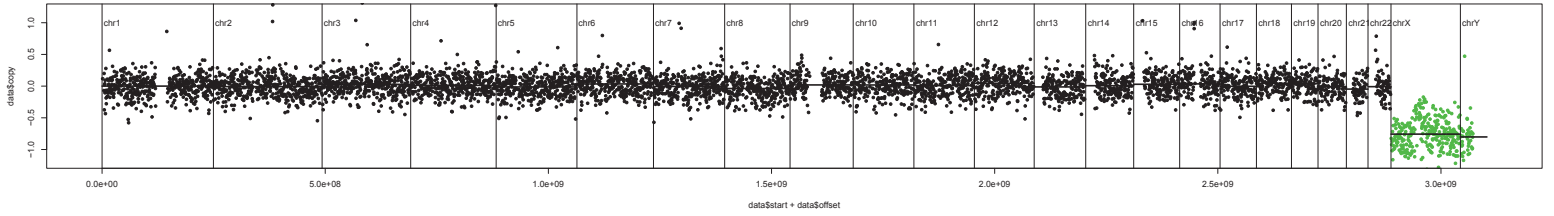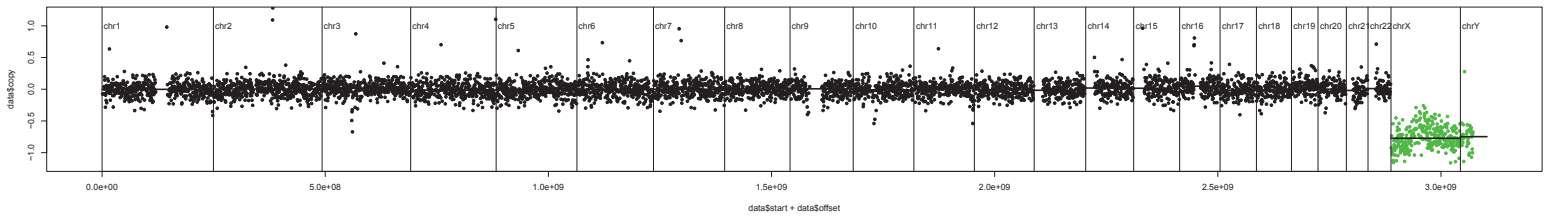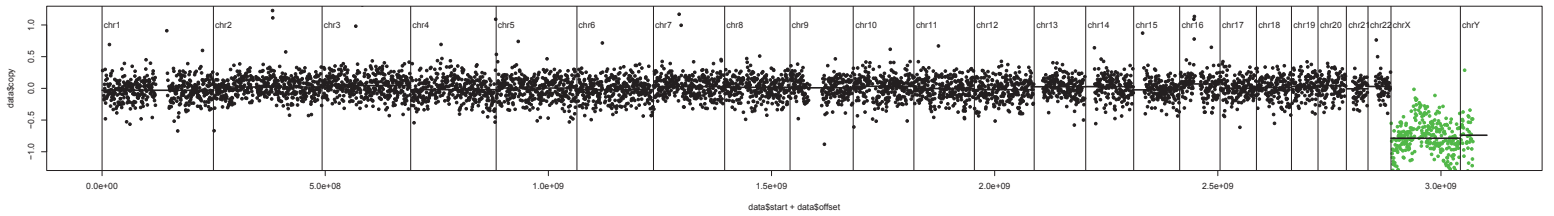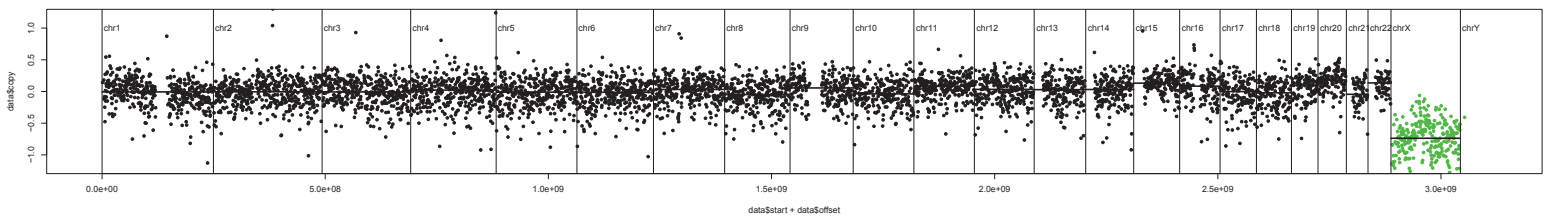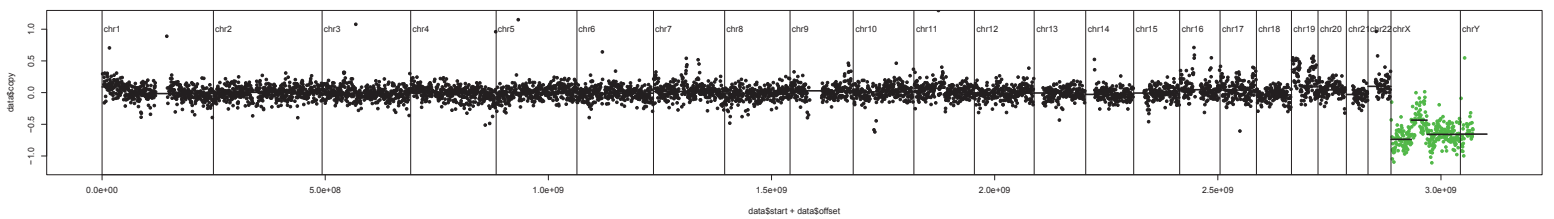

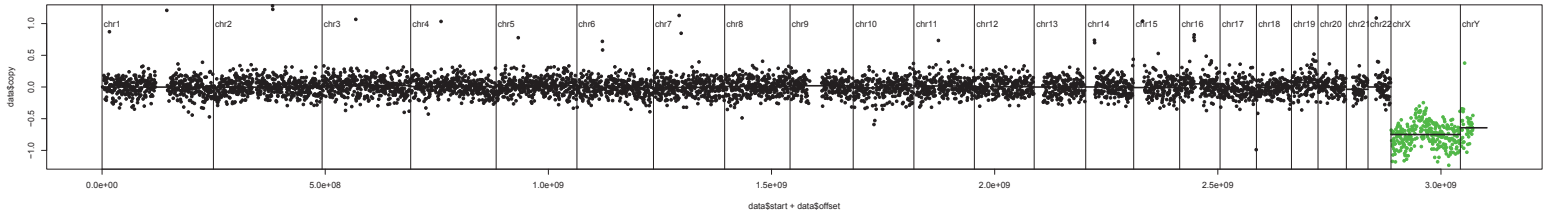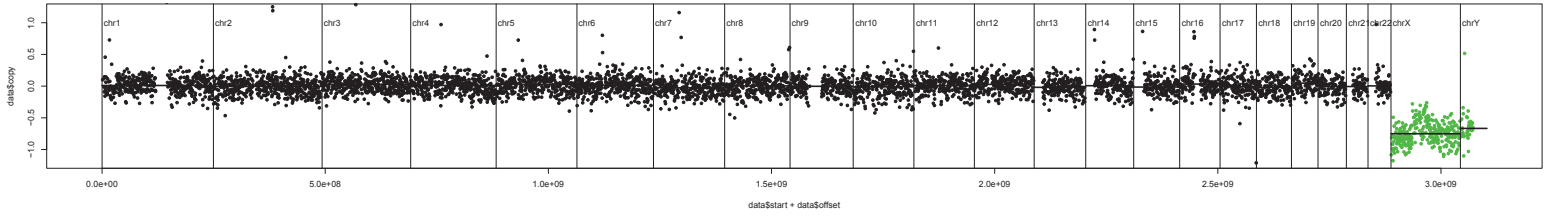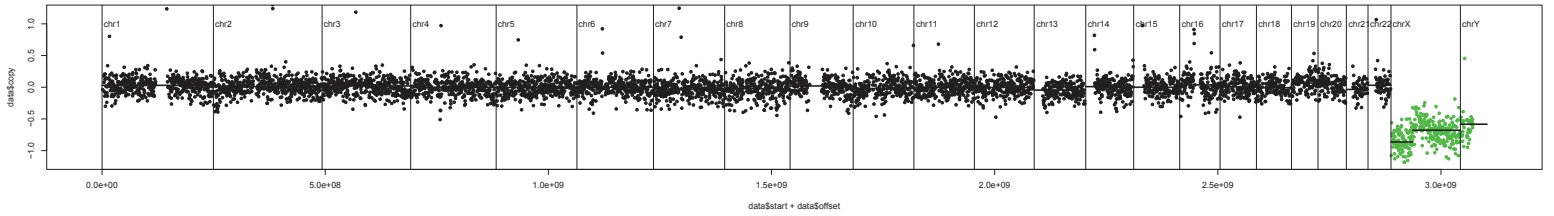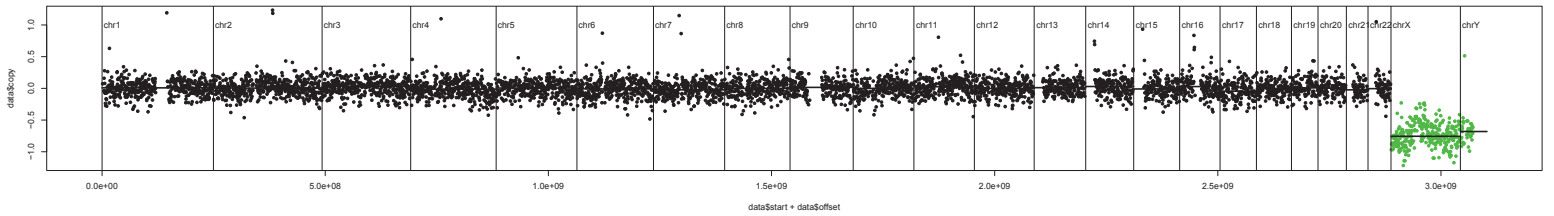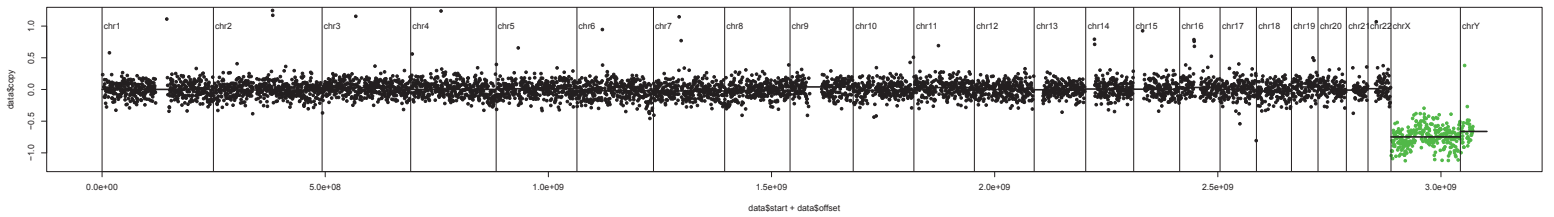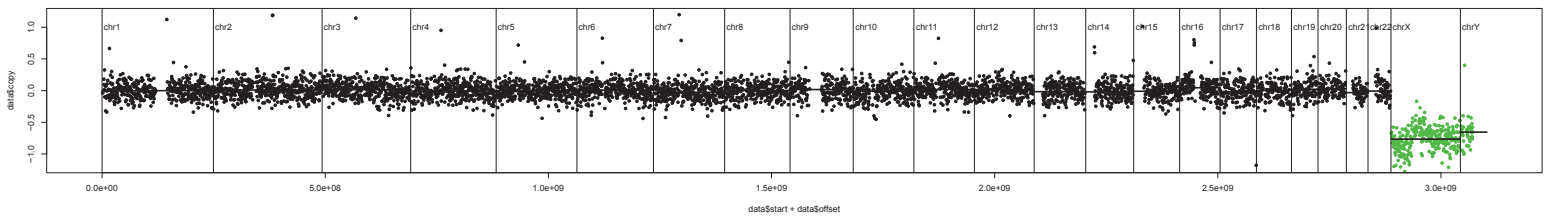

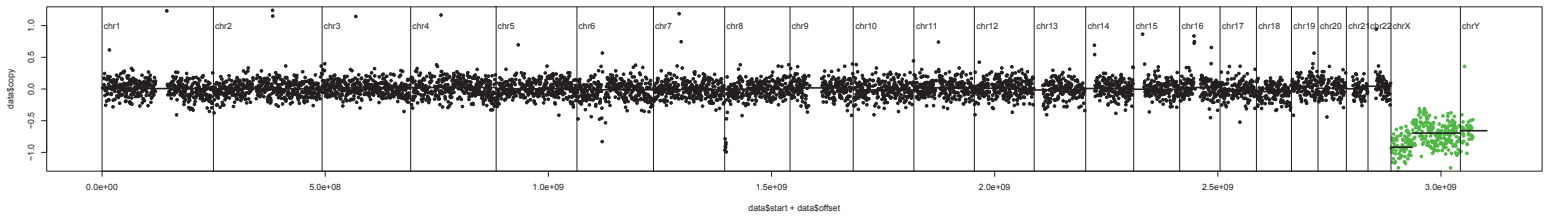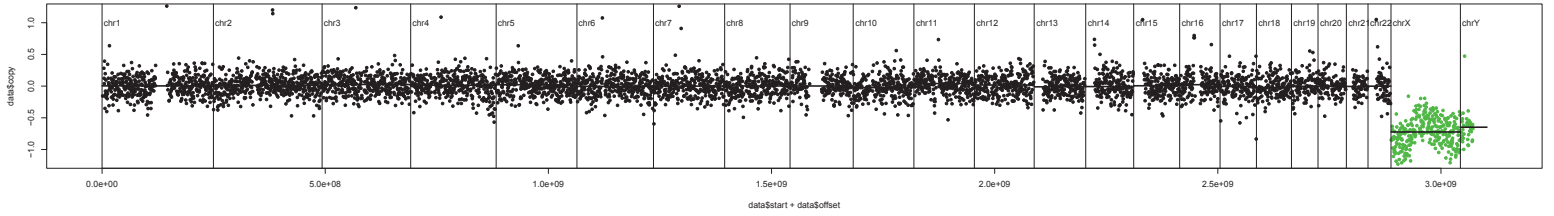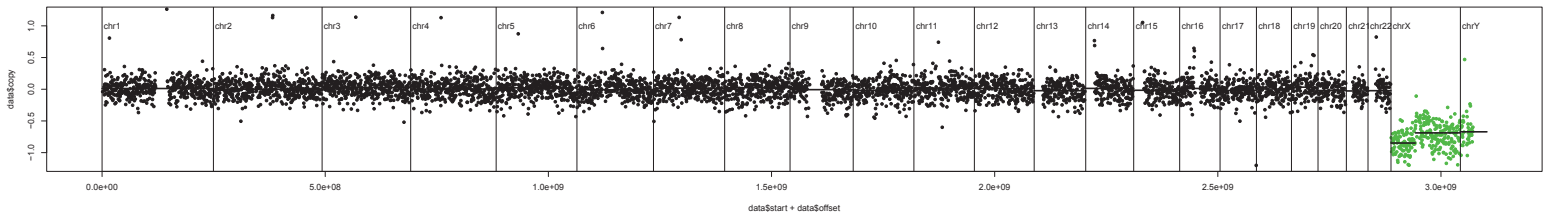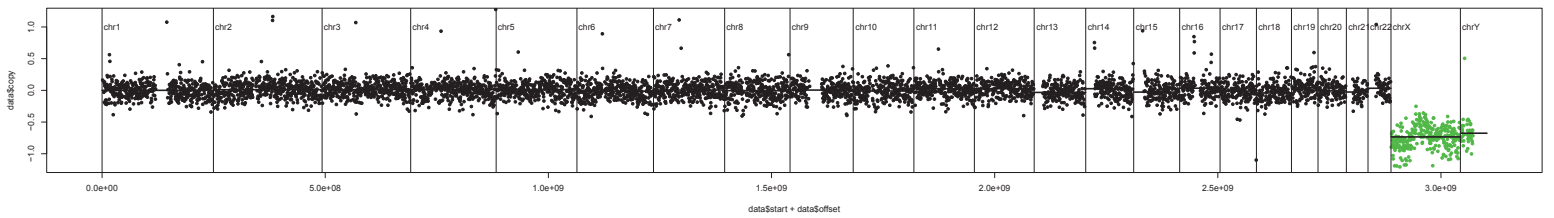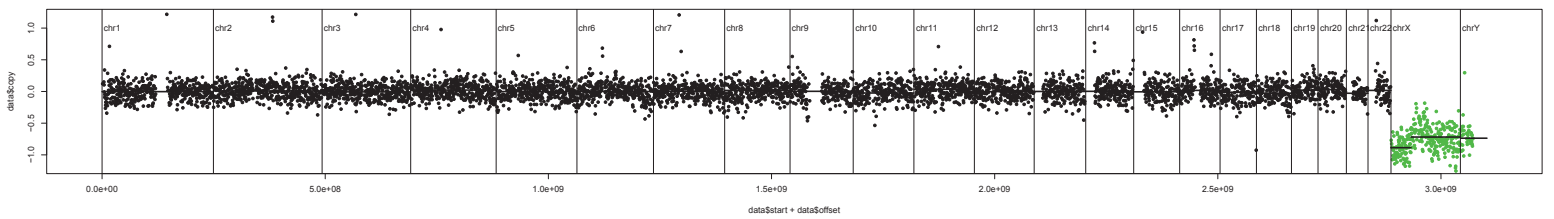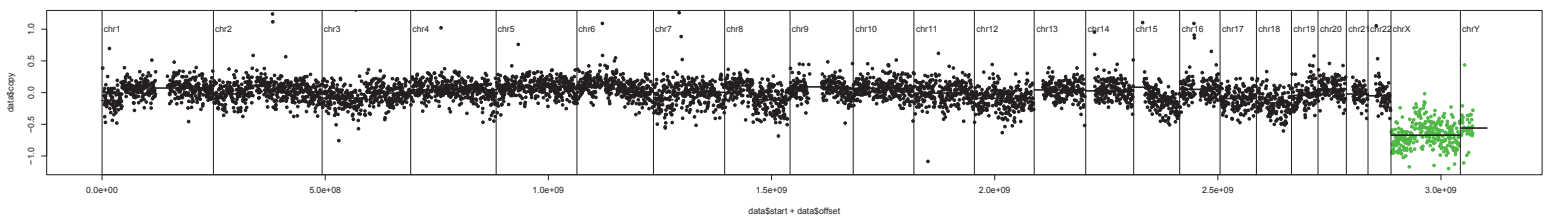

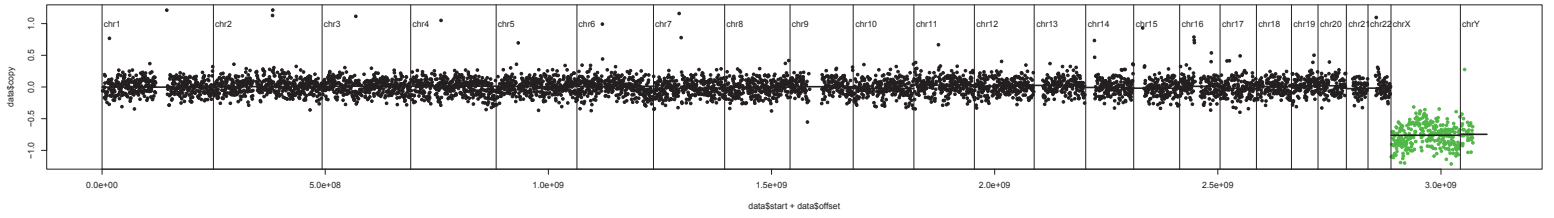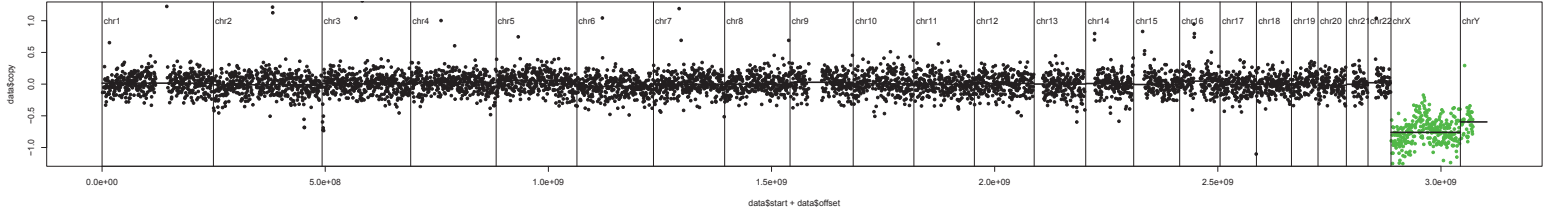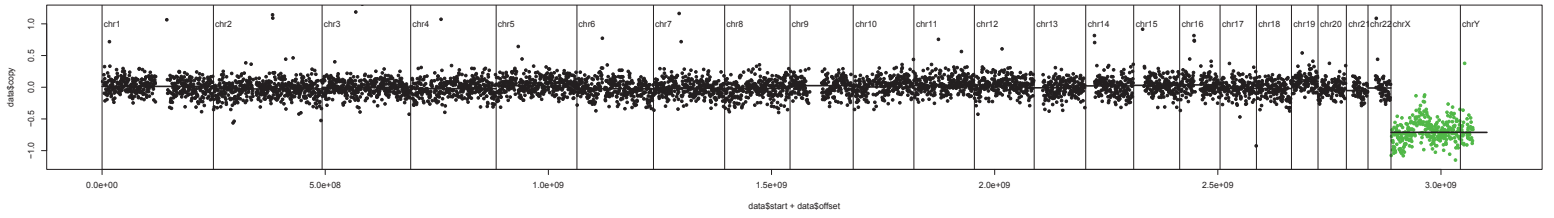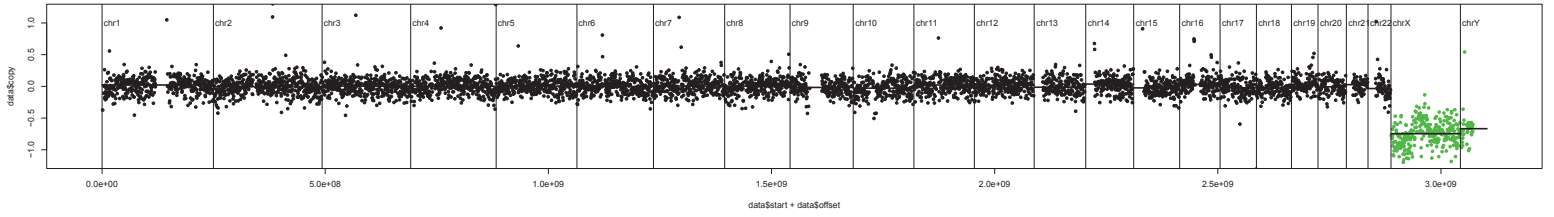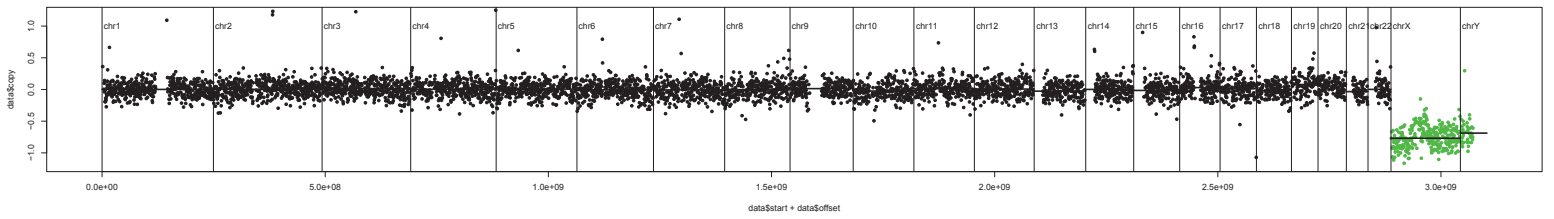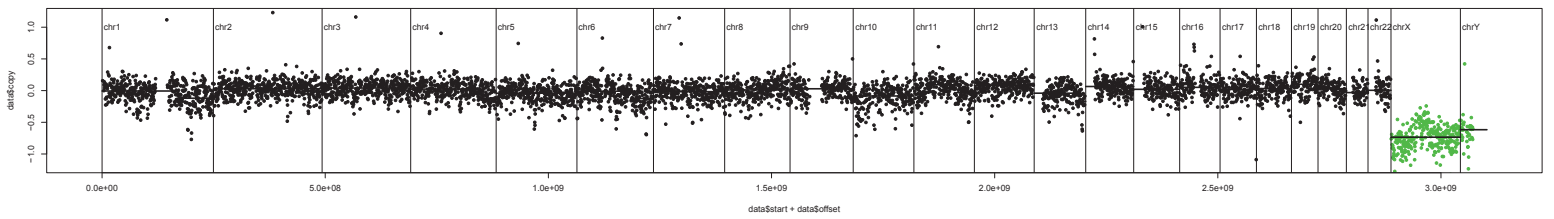

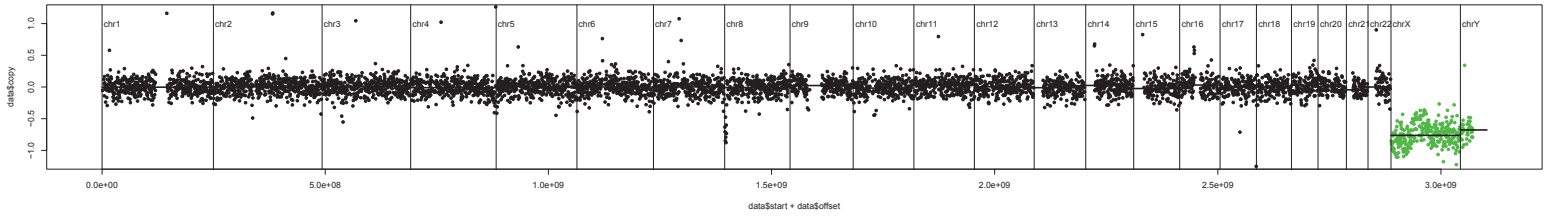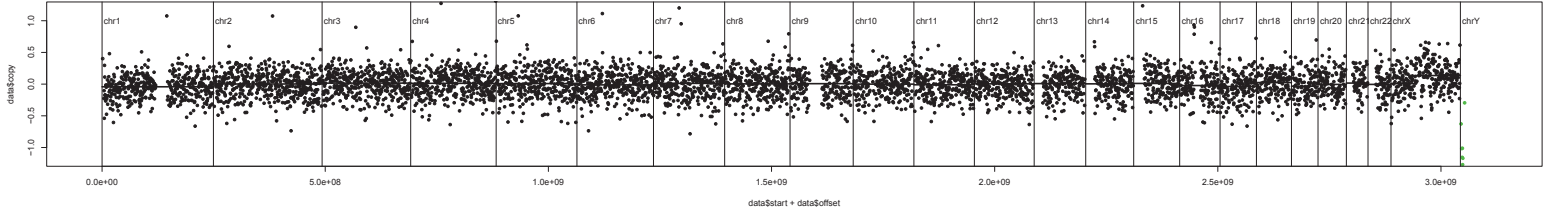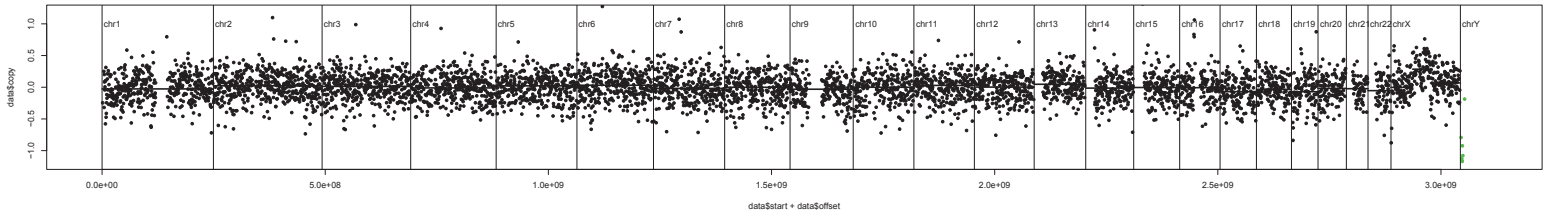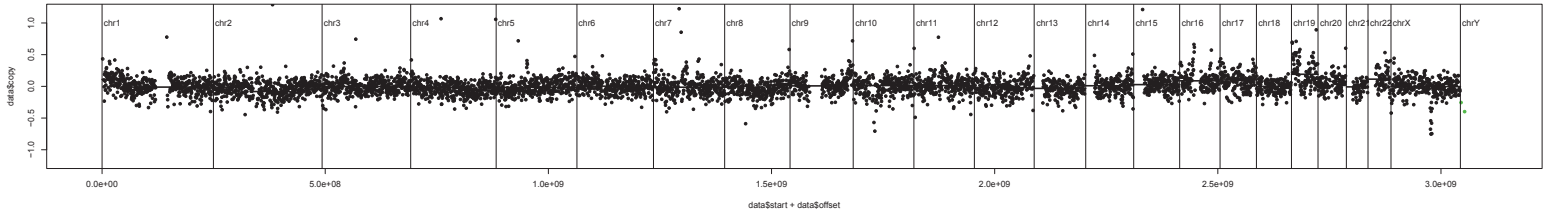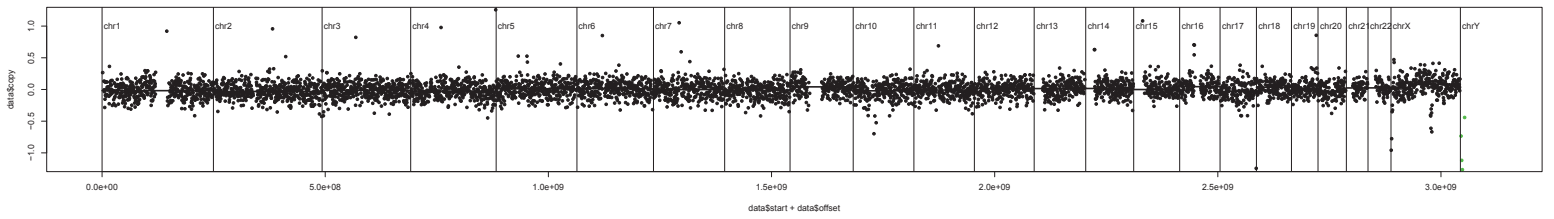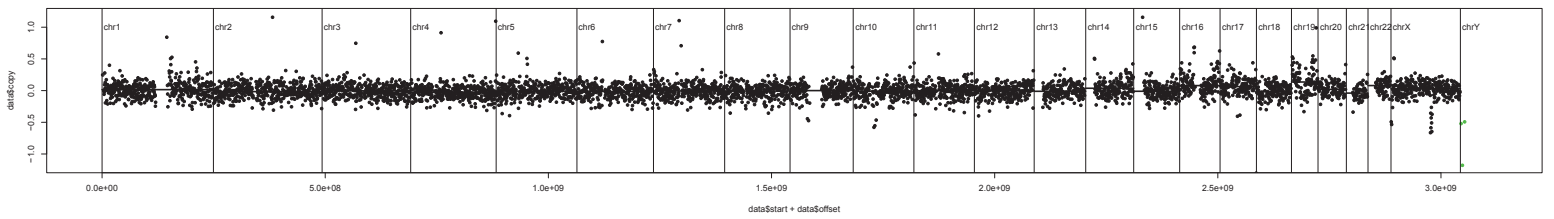

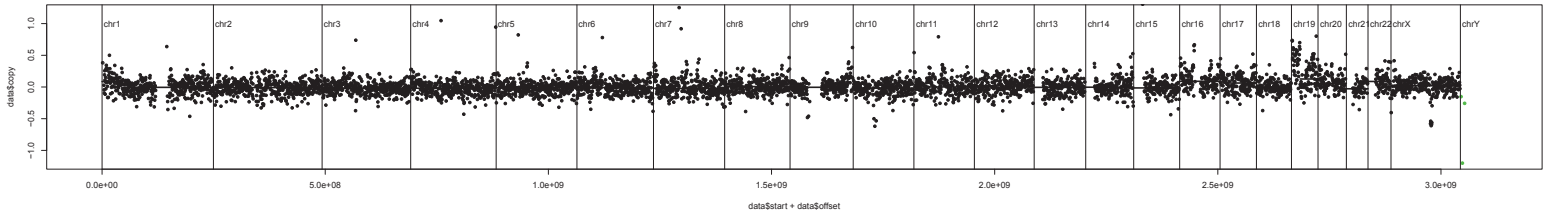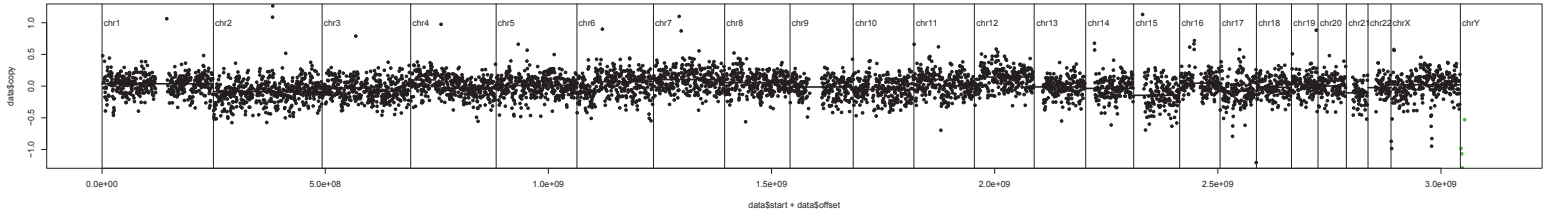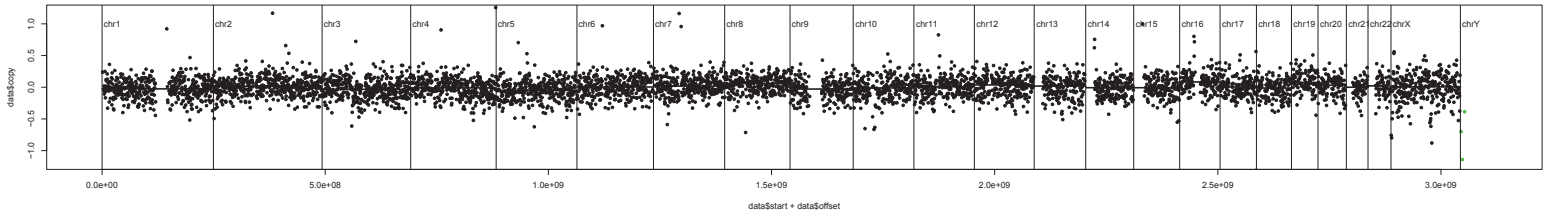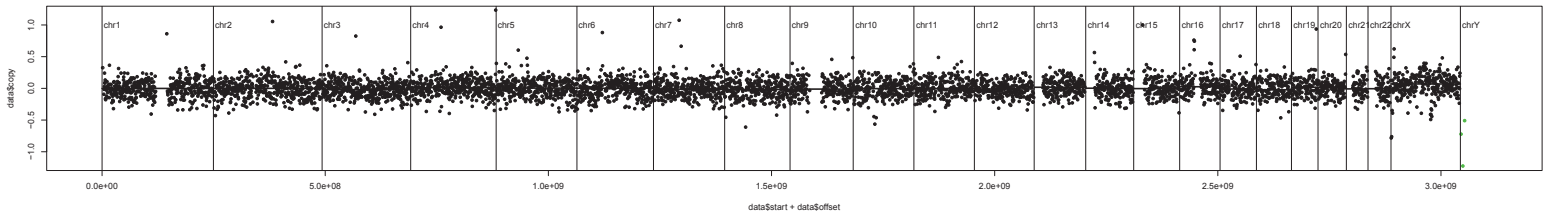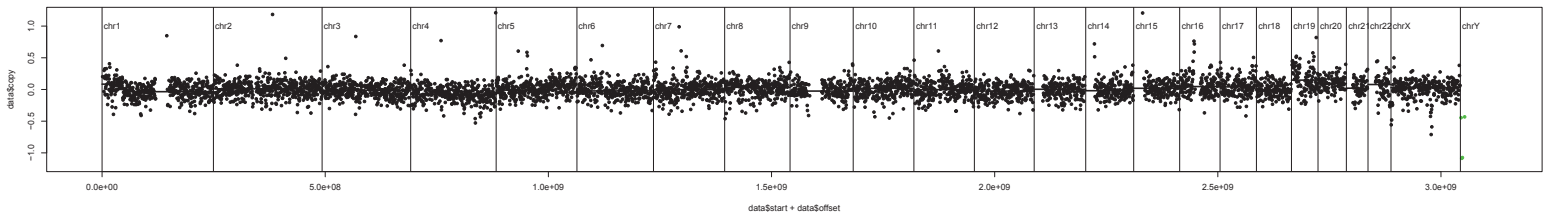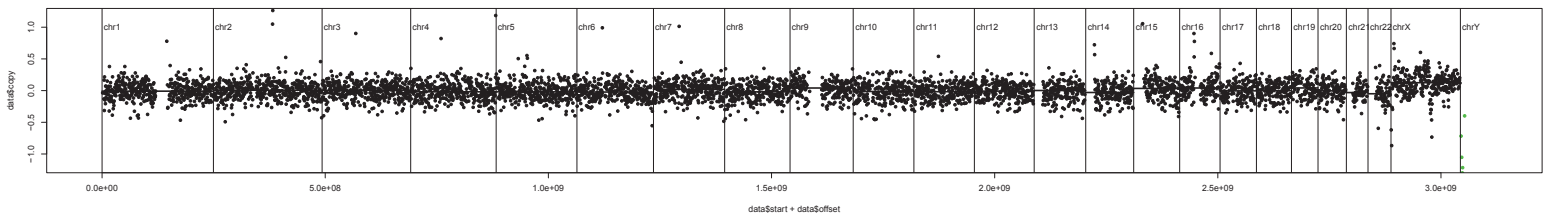



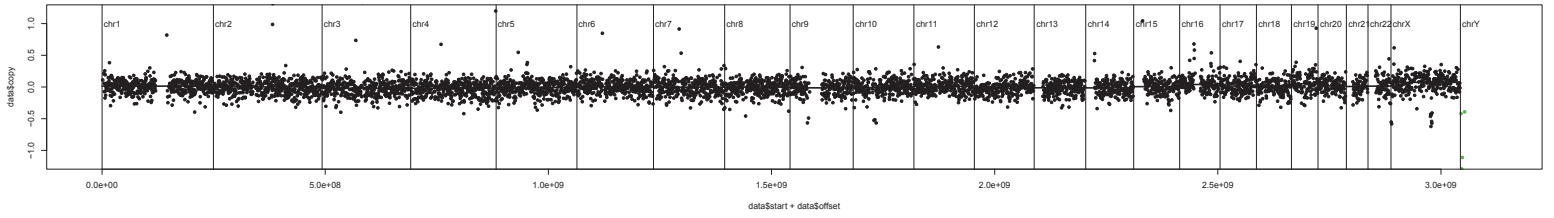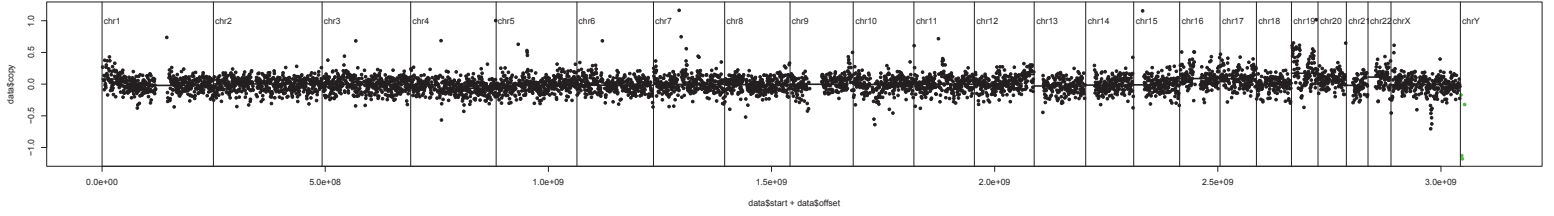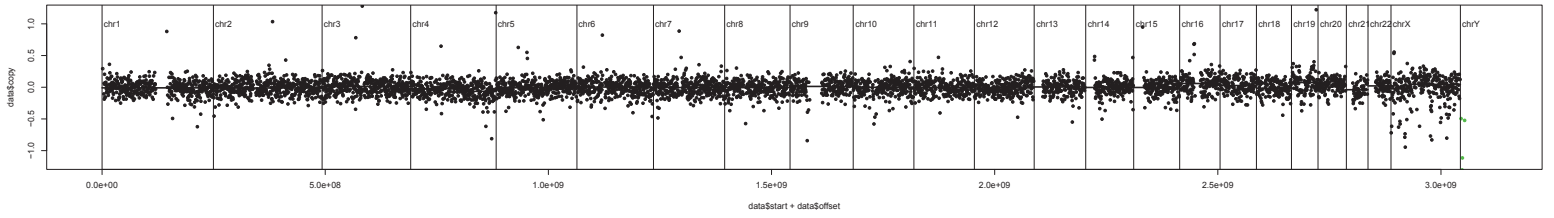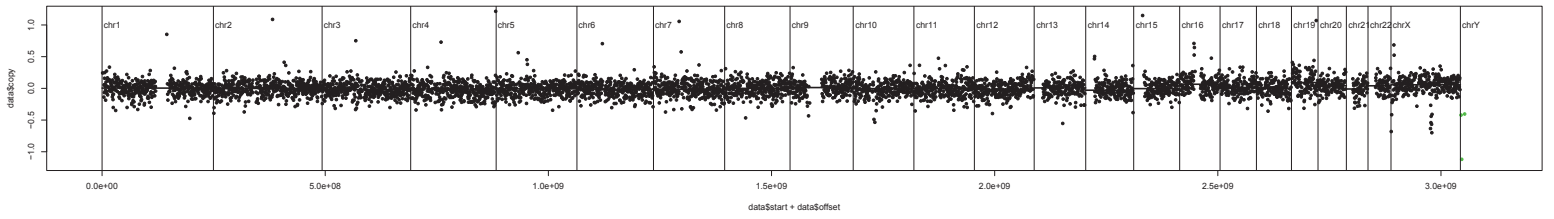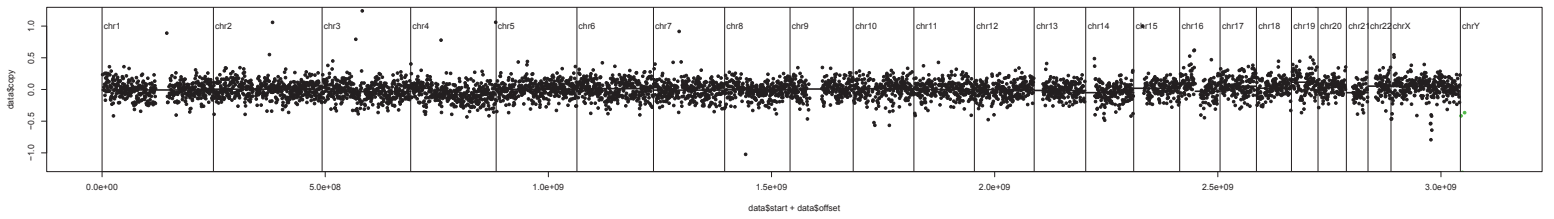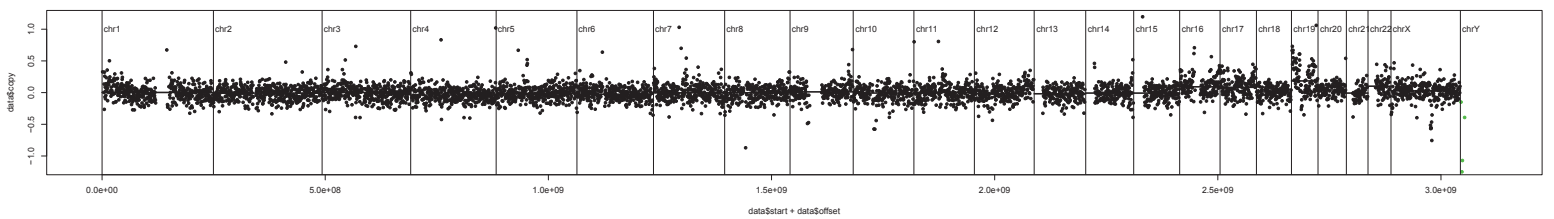

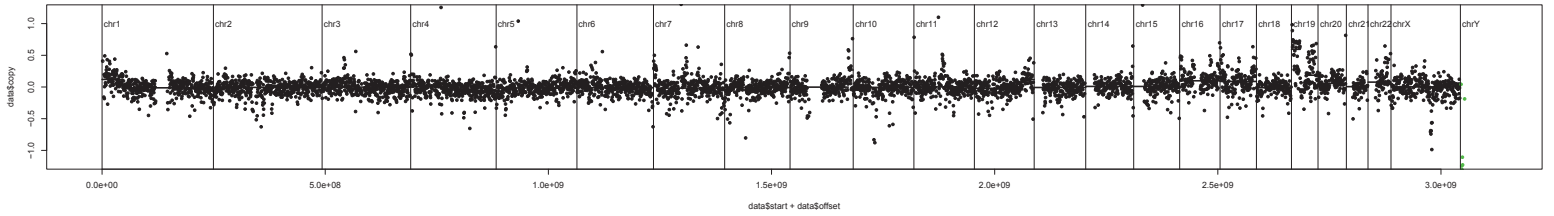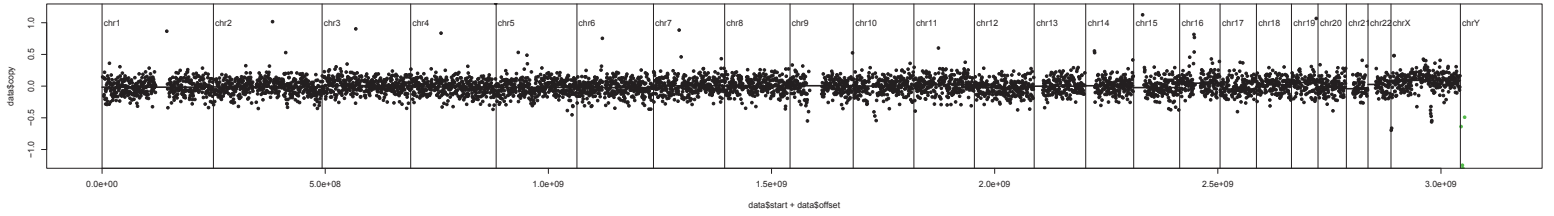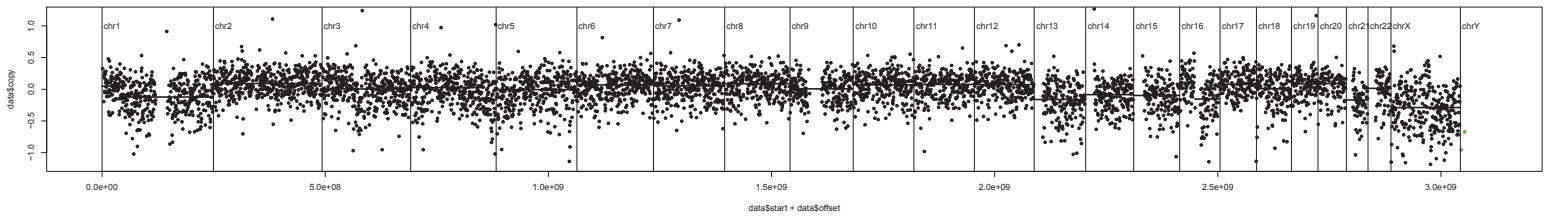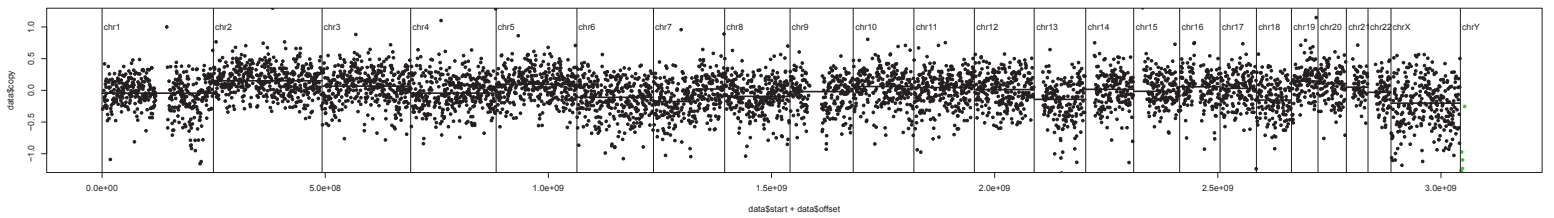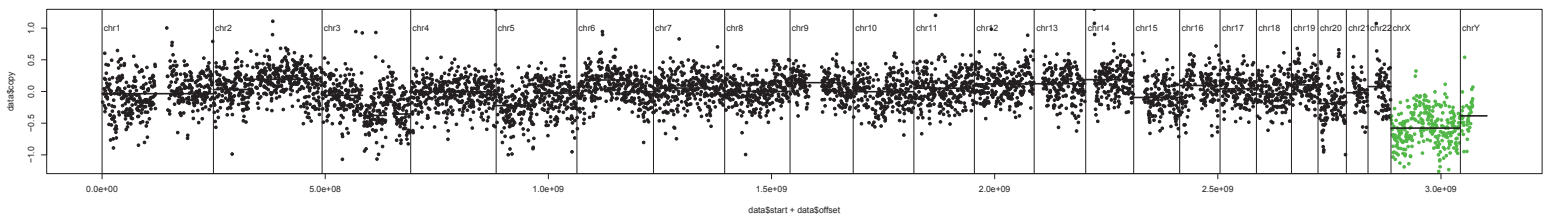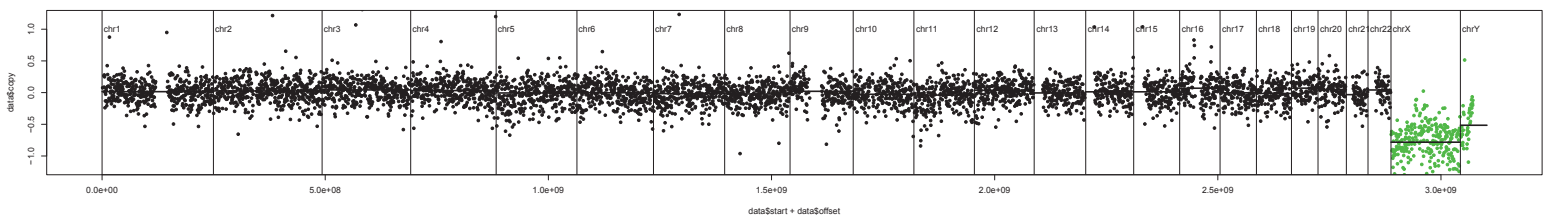

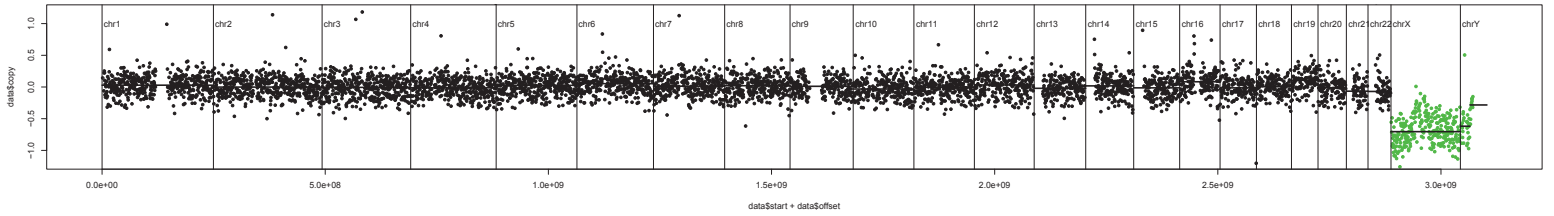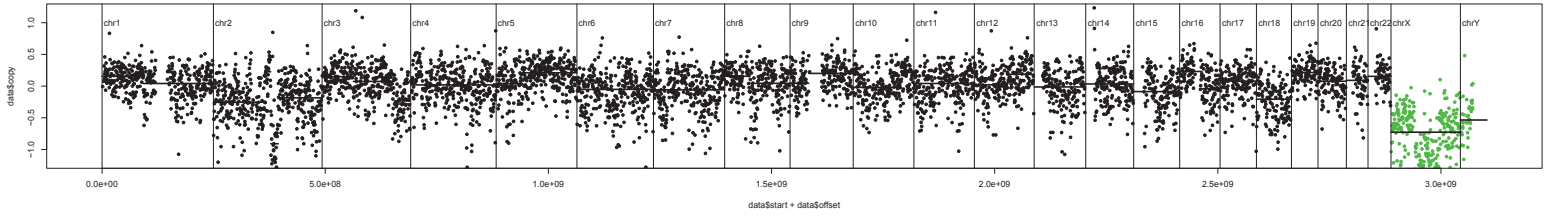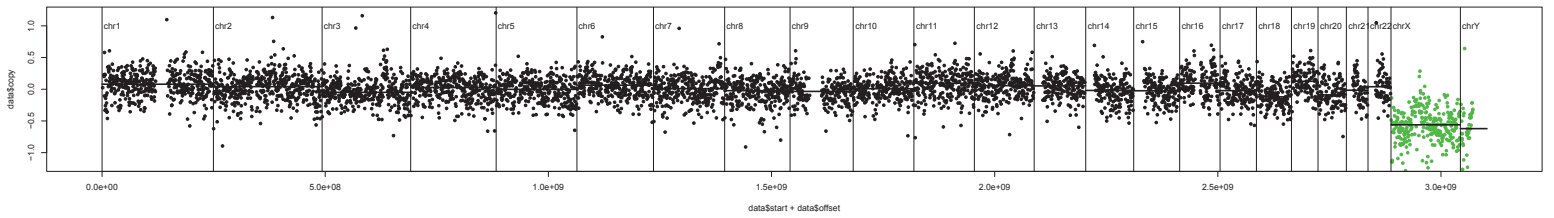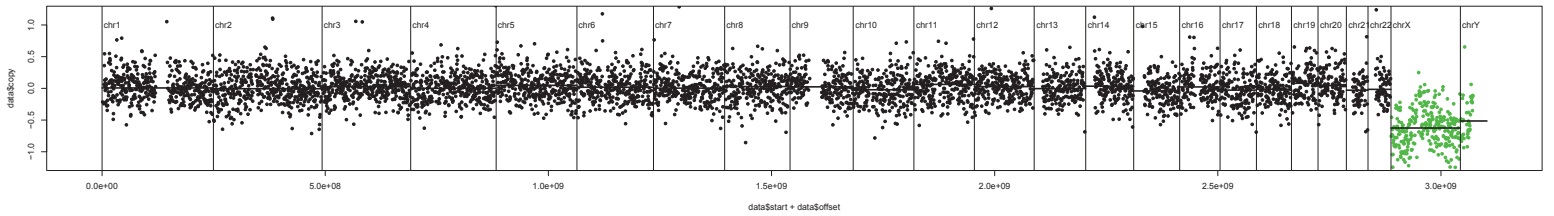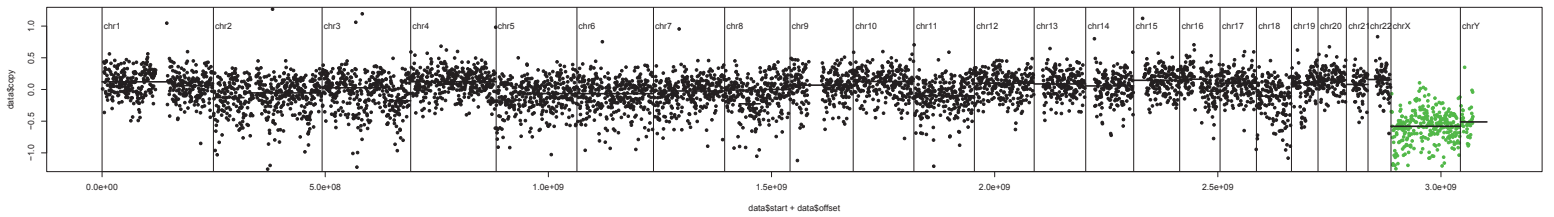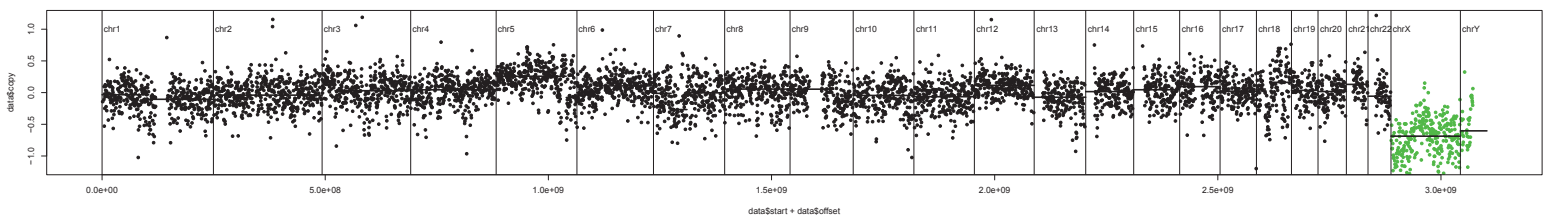

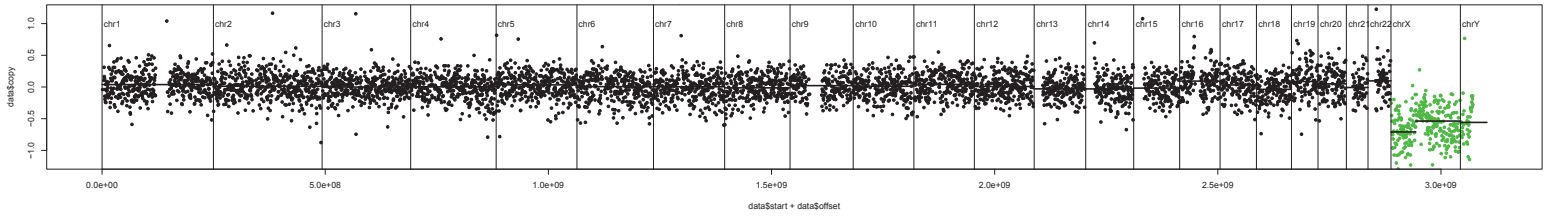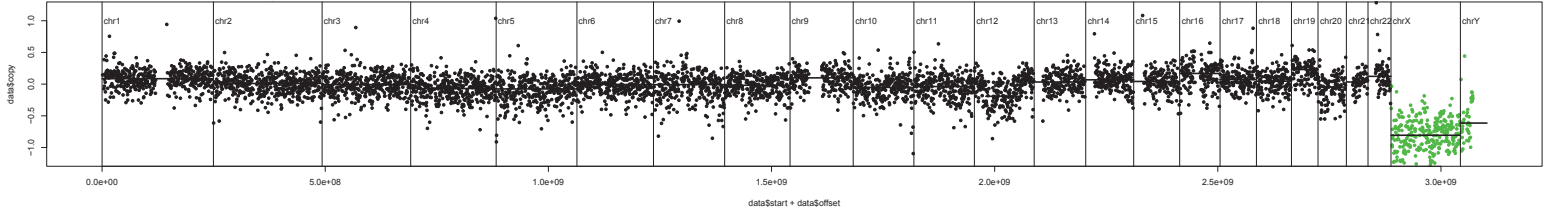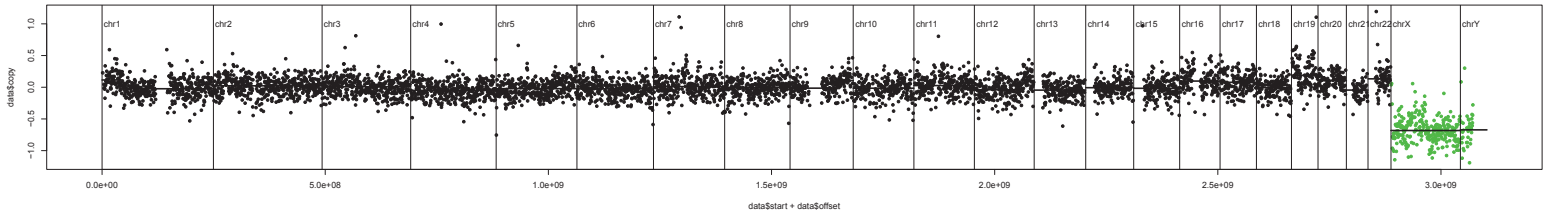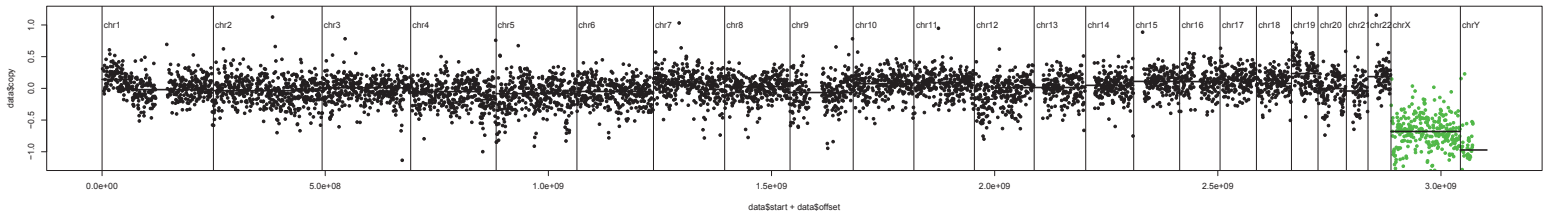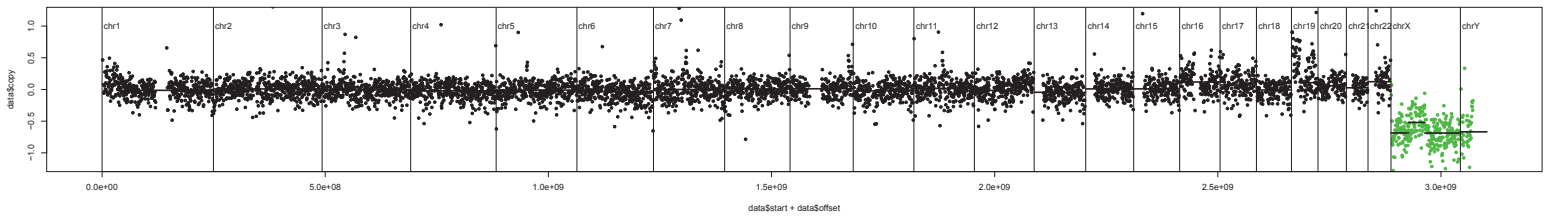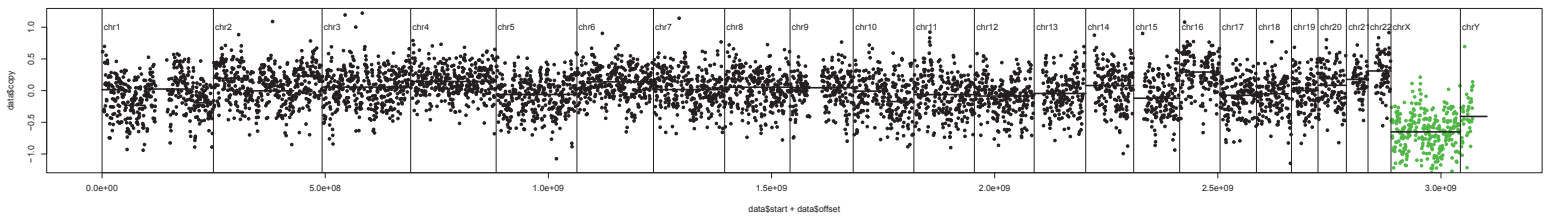

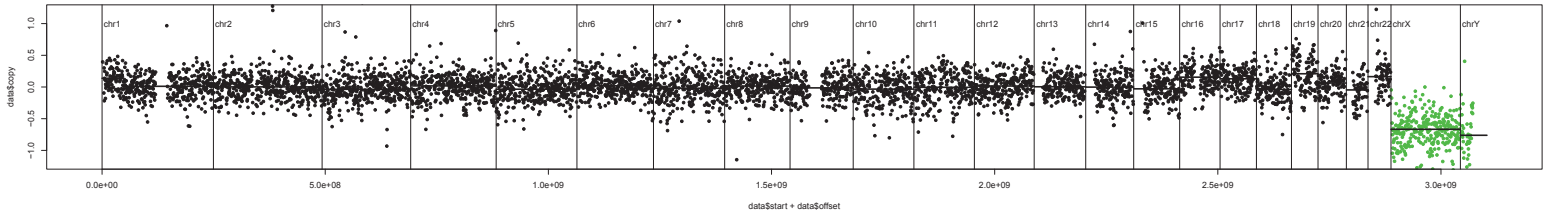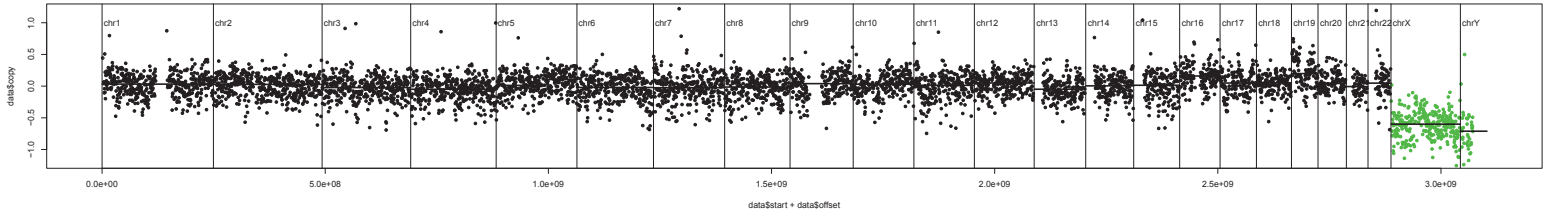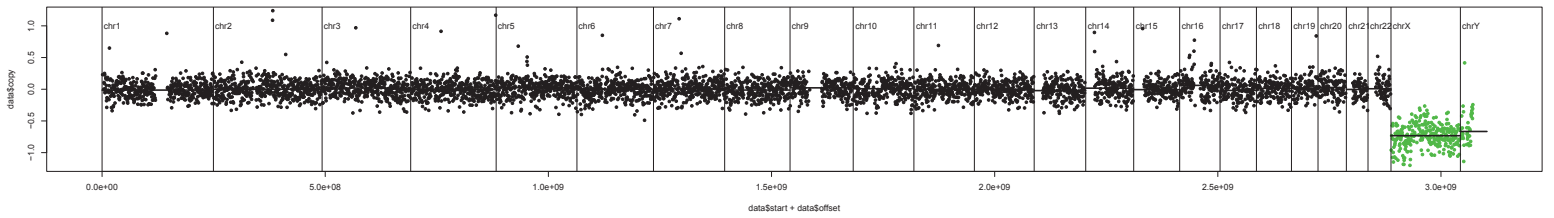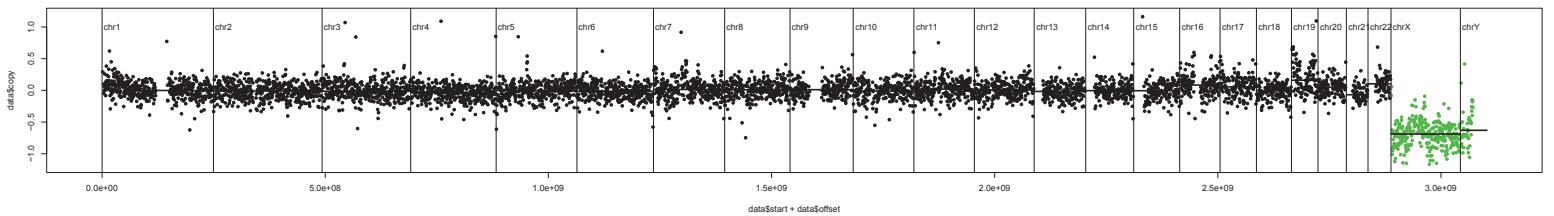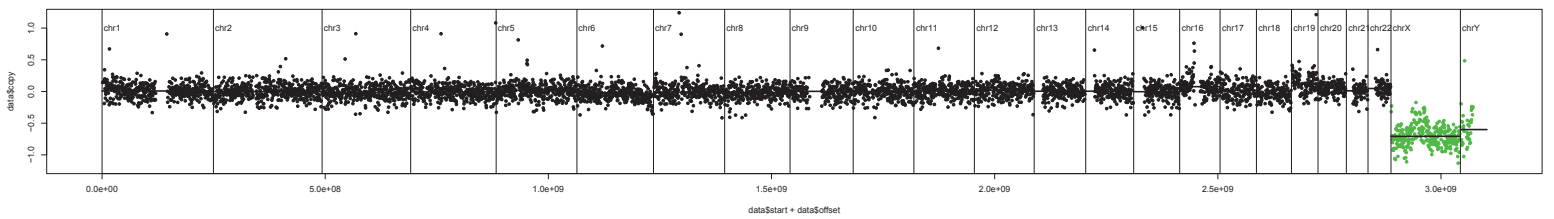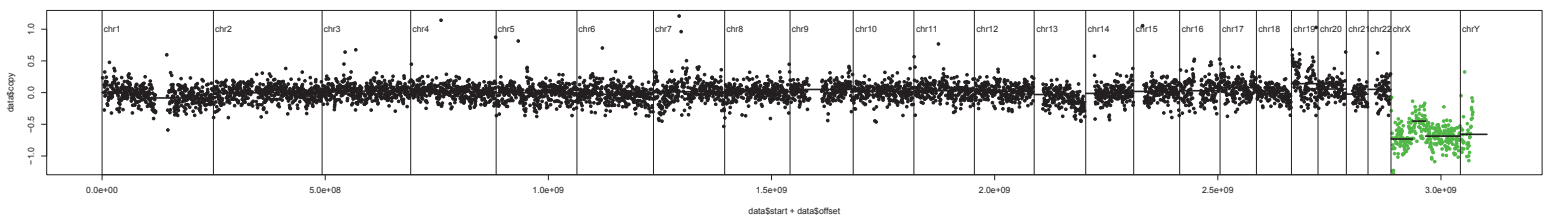

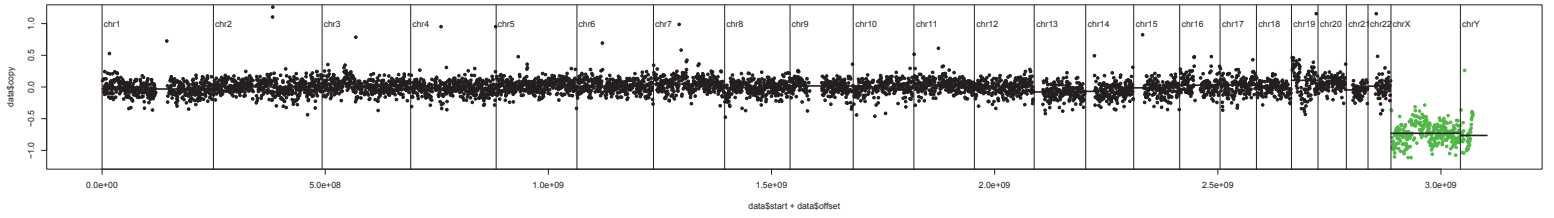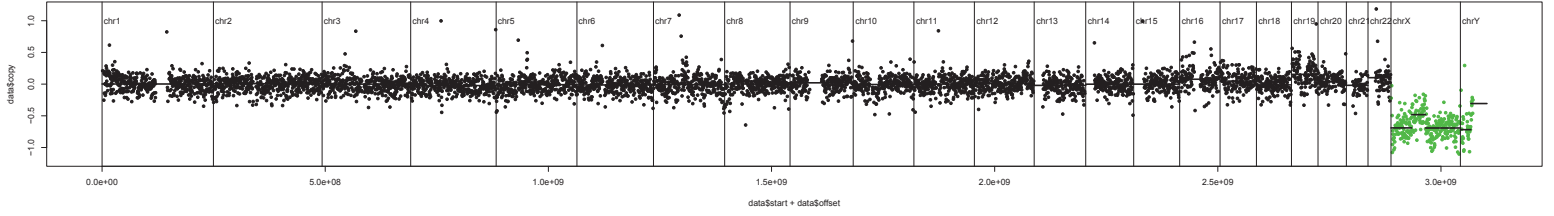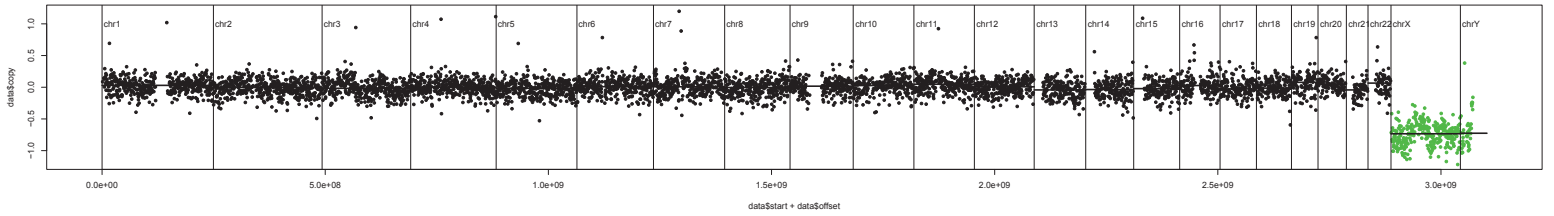

# Mouse Hepatocyte Nuclei

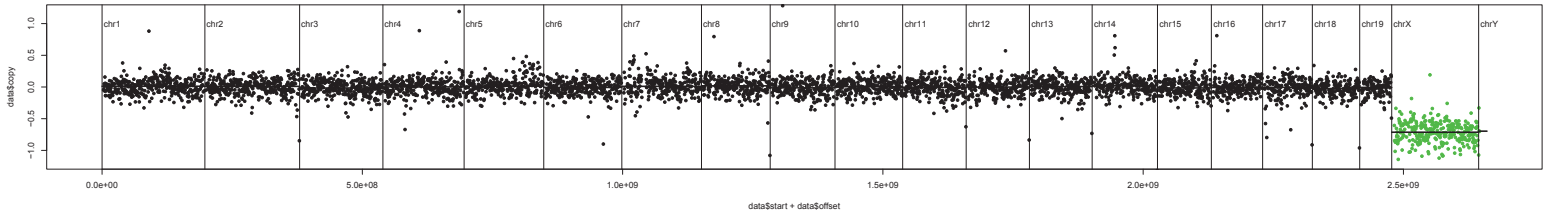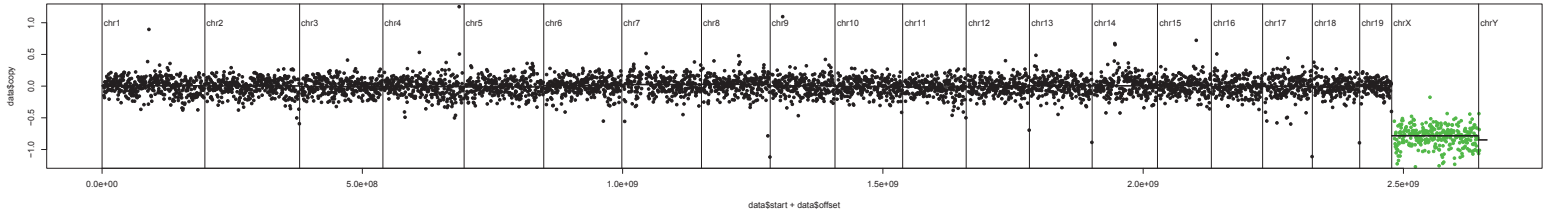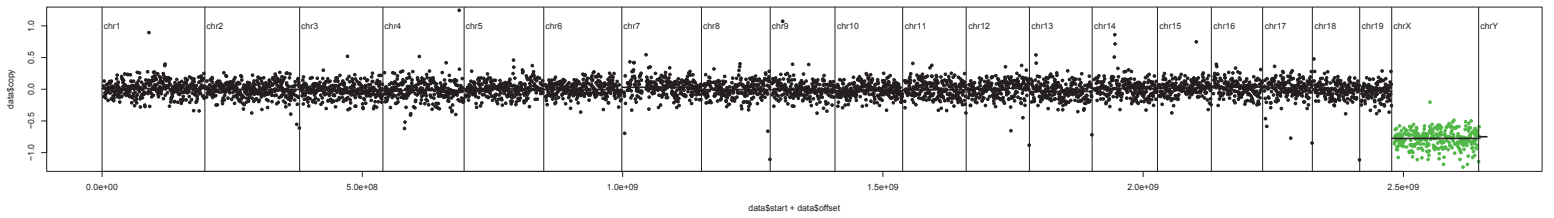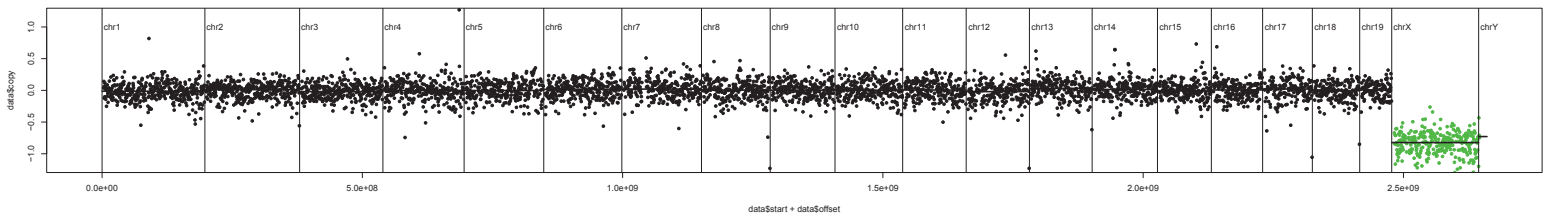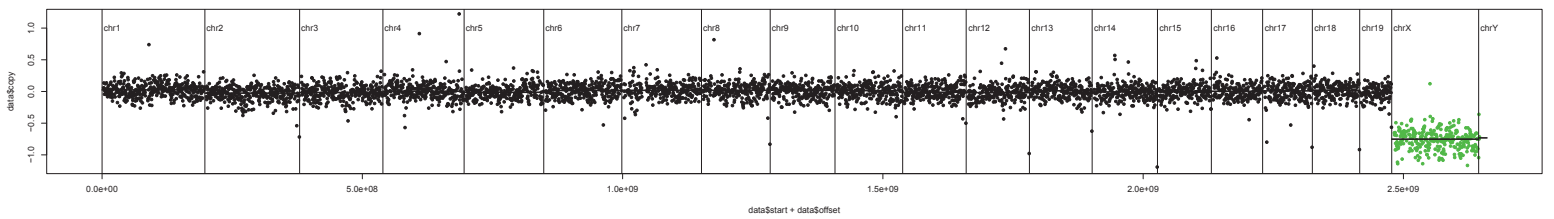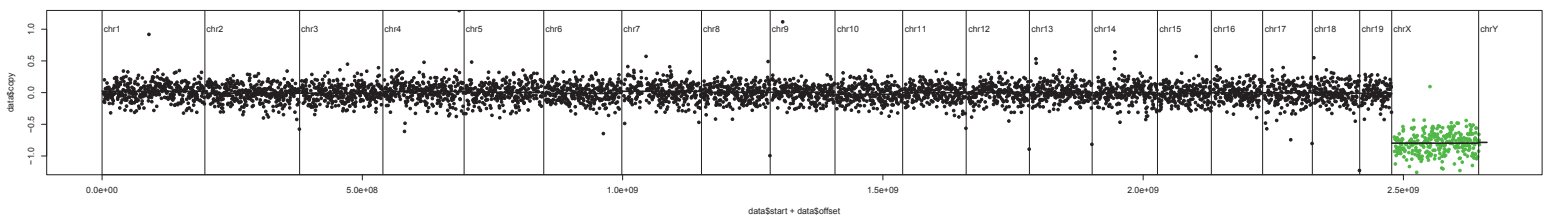

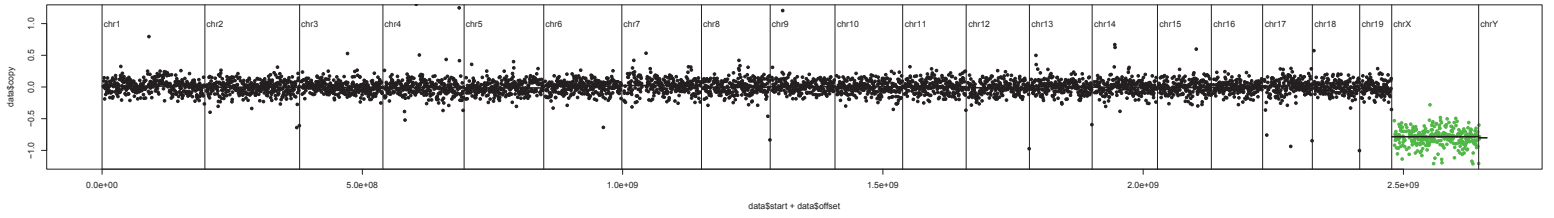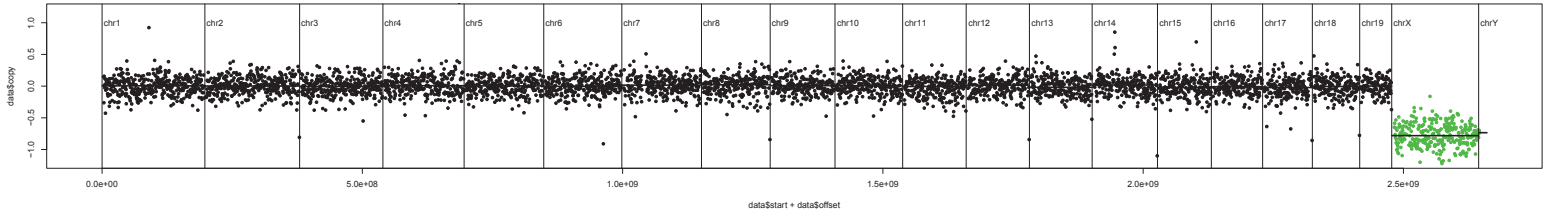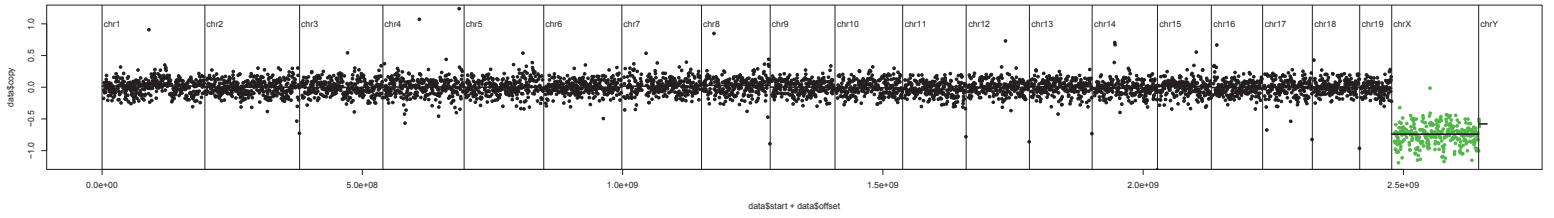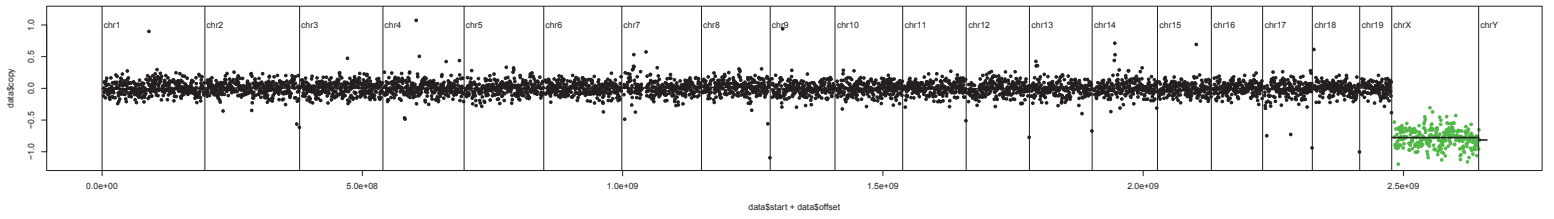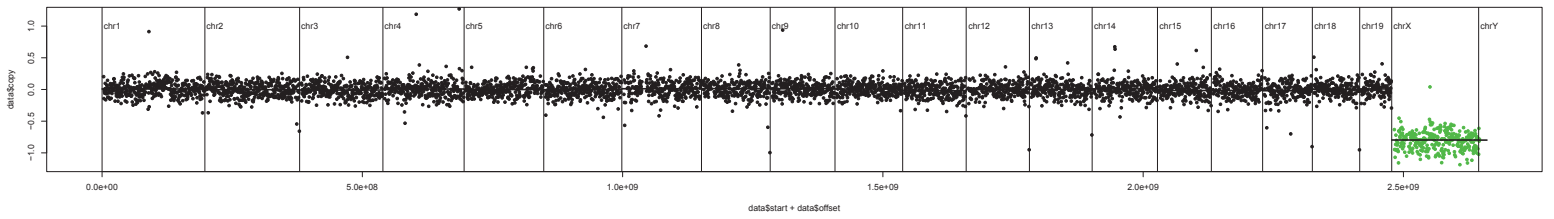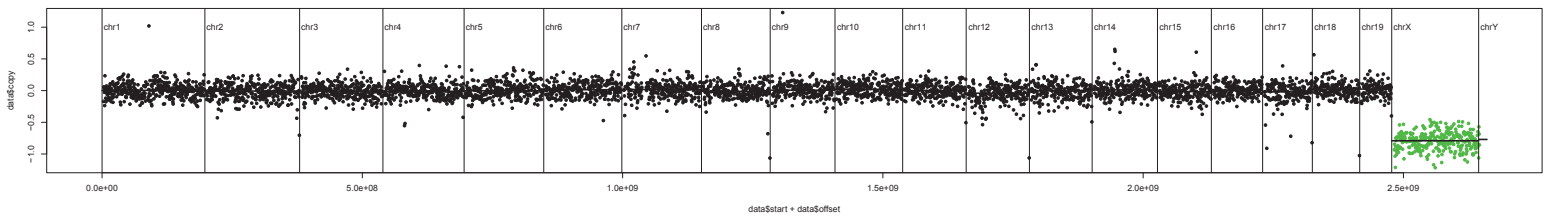



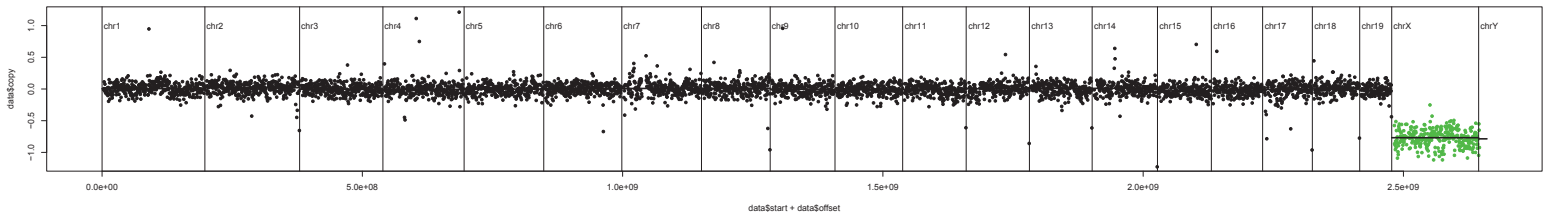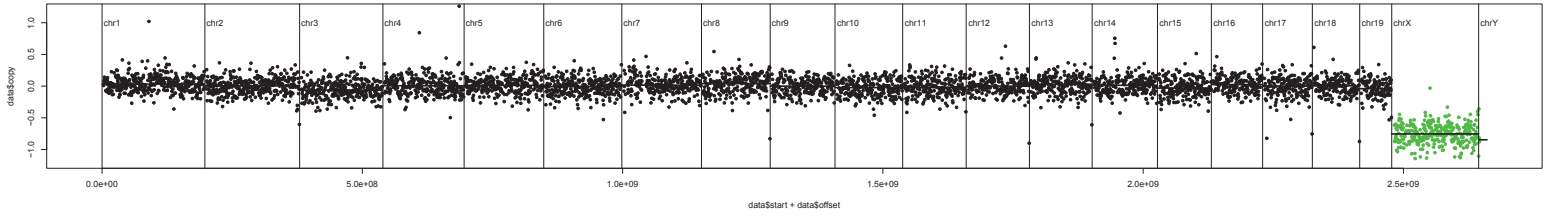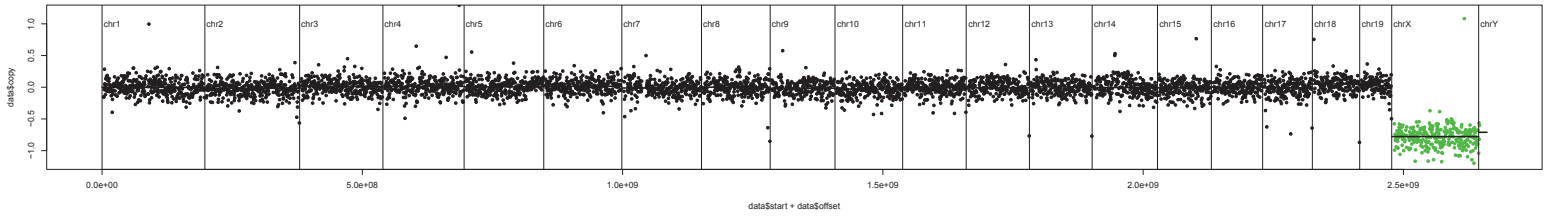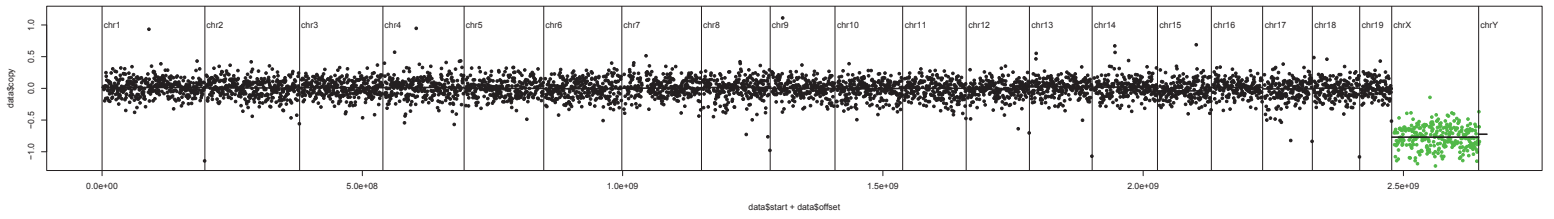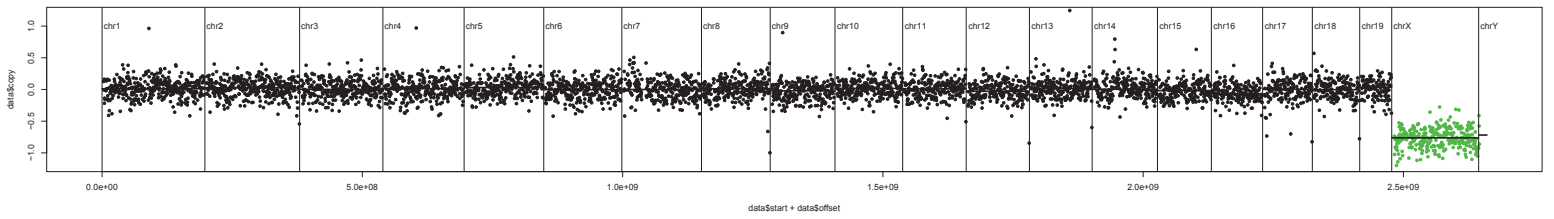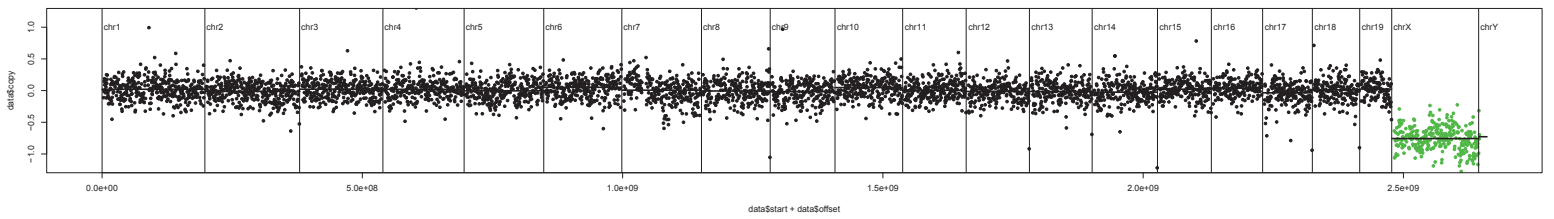

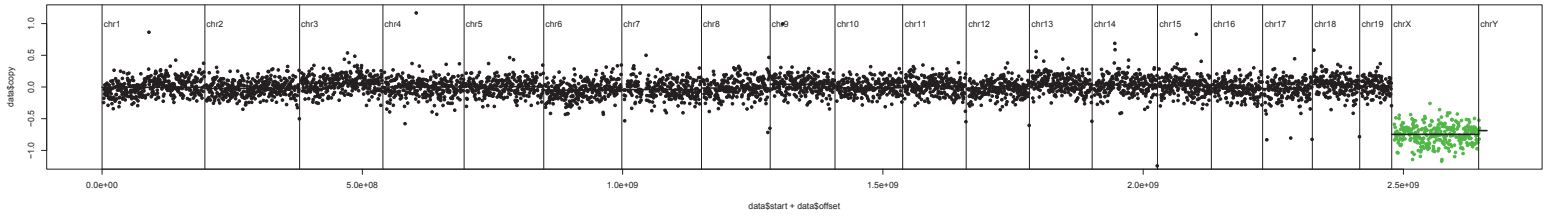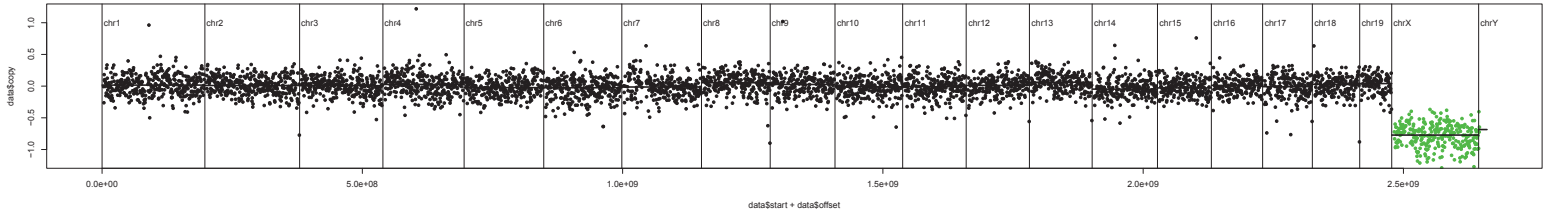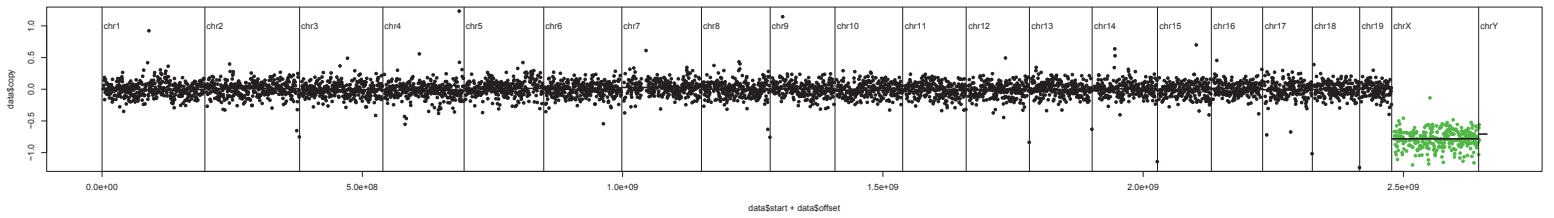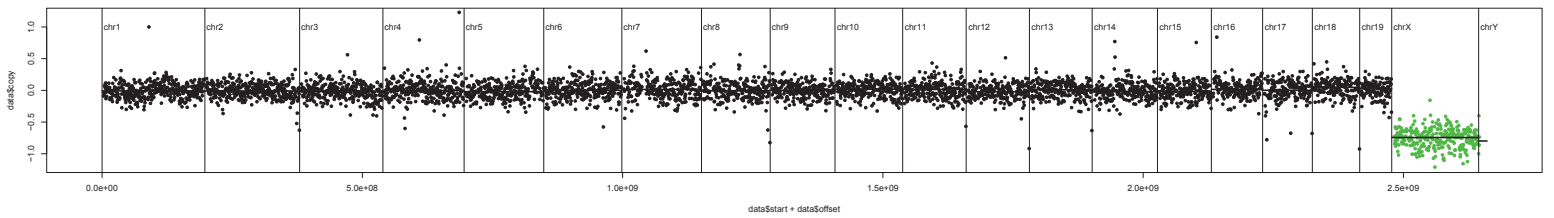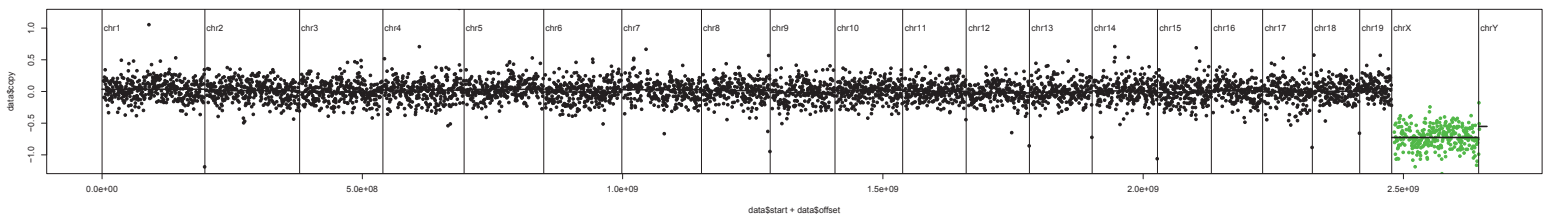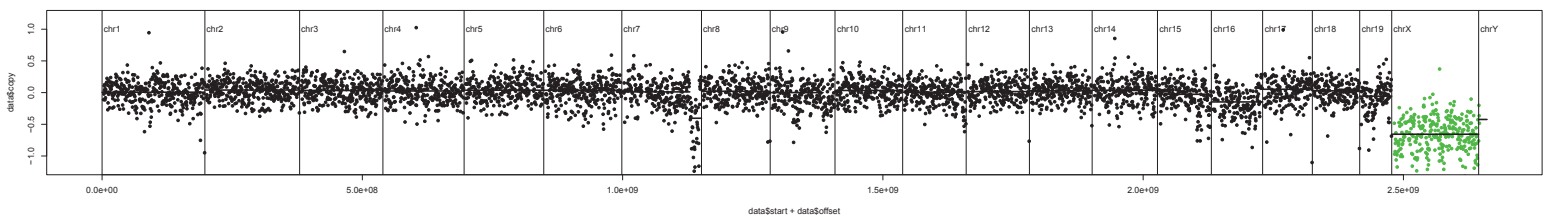

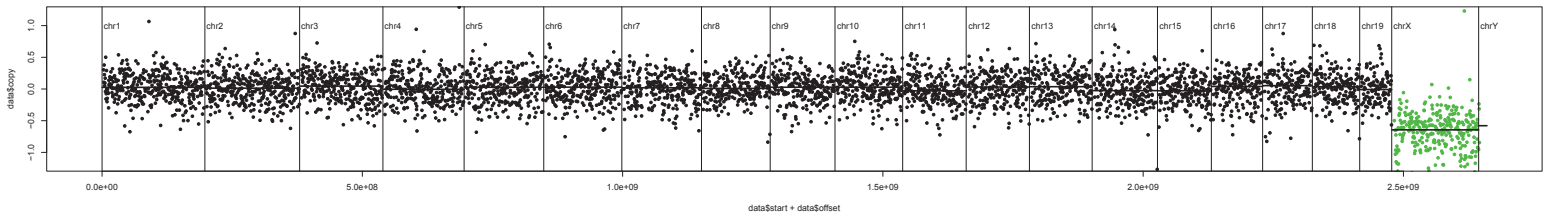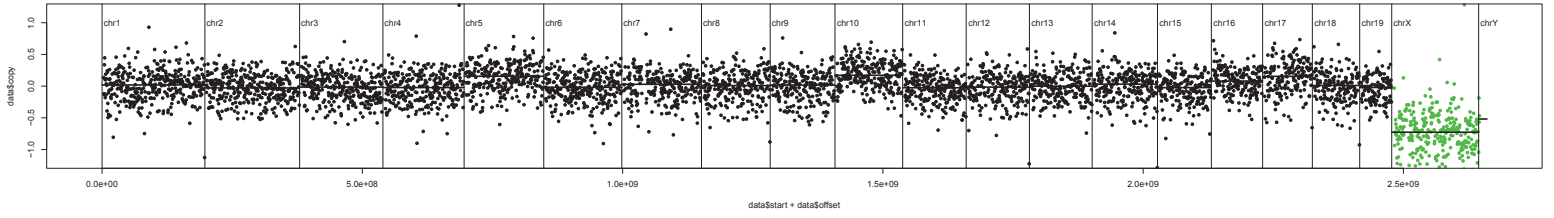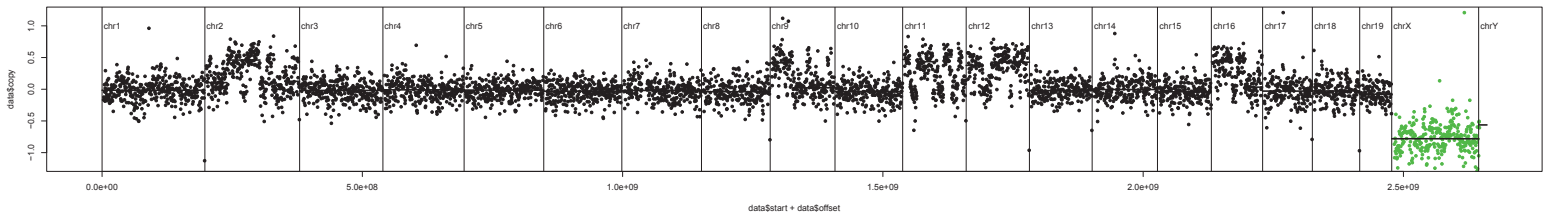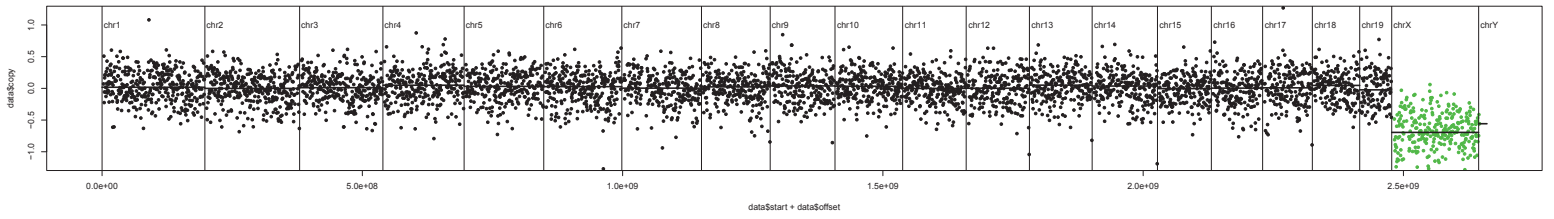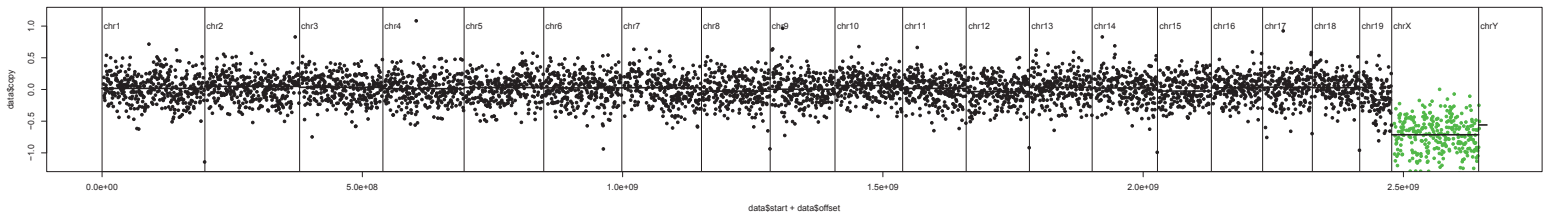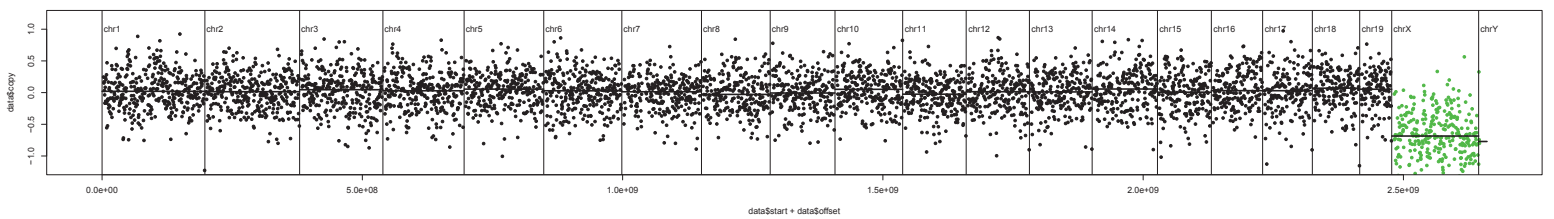

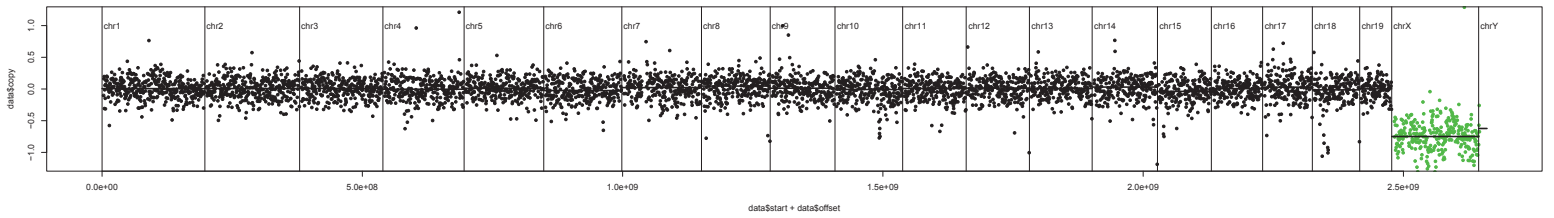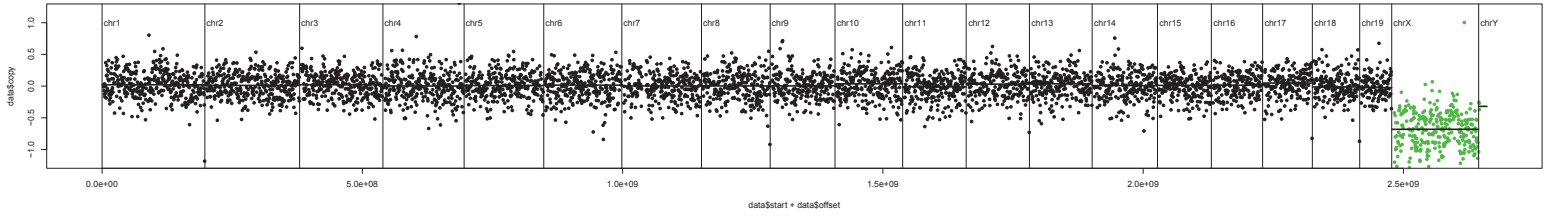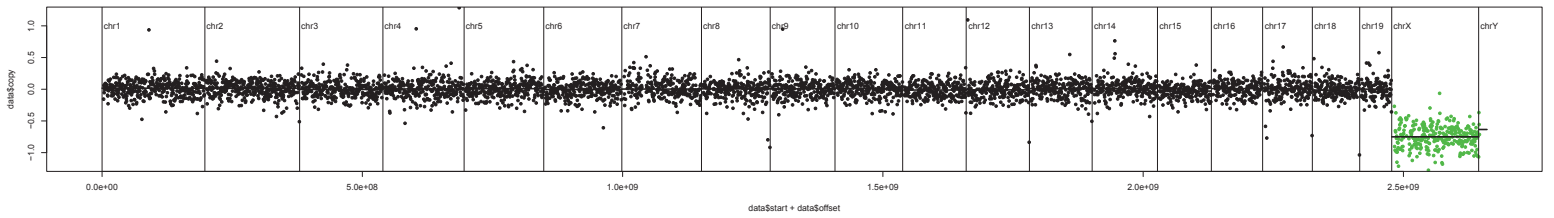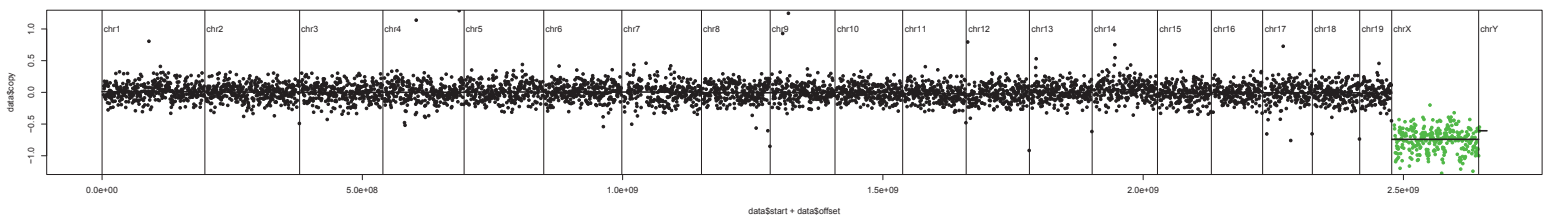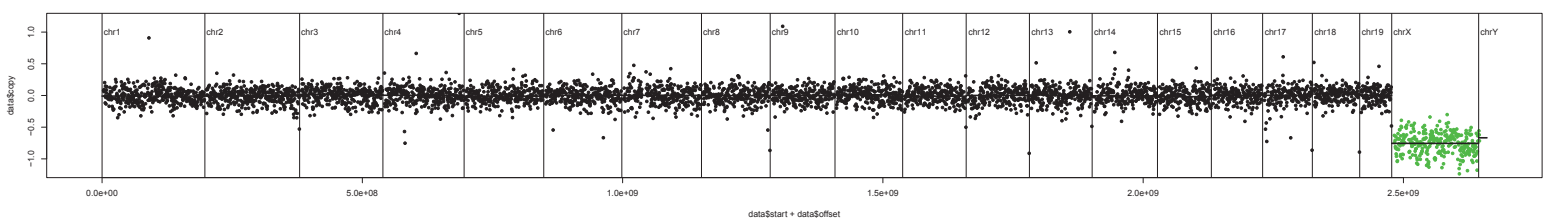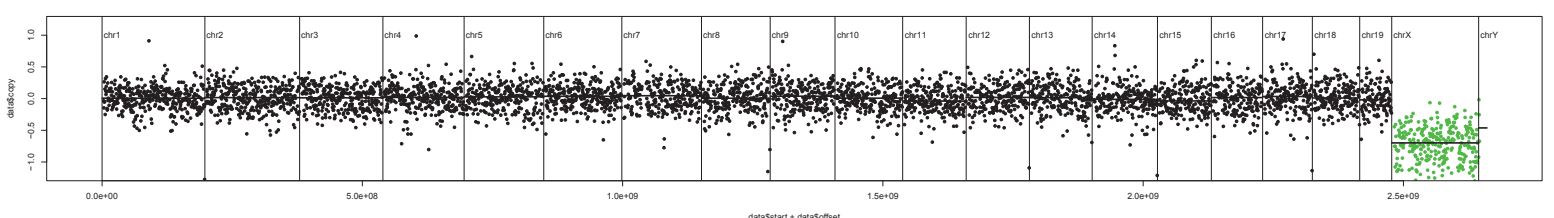

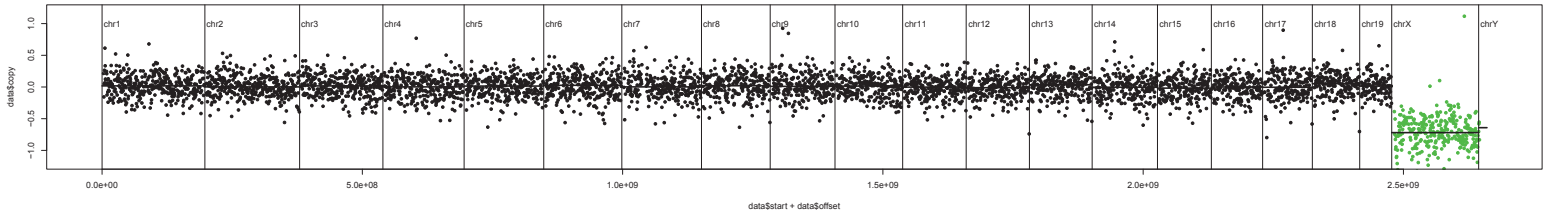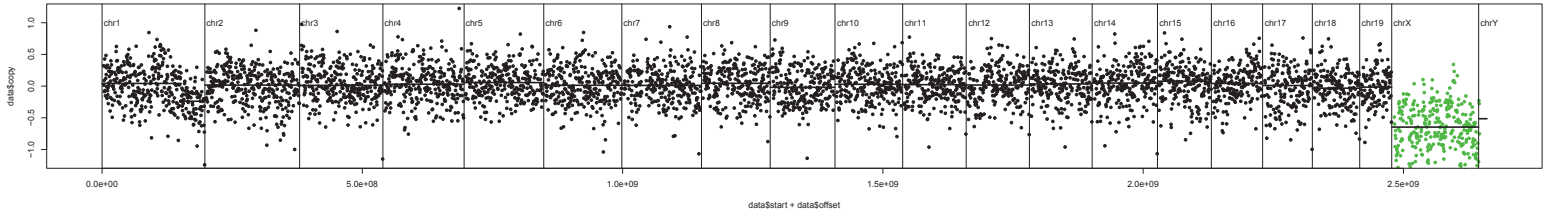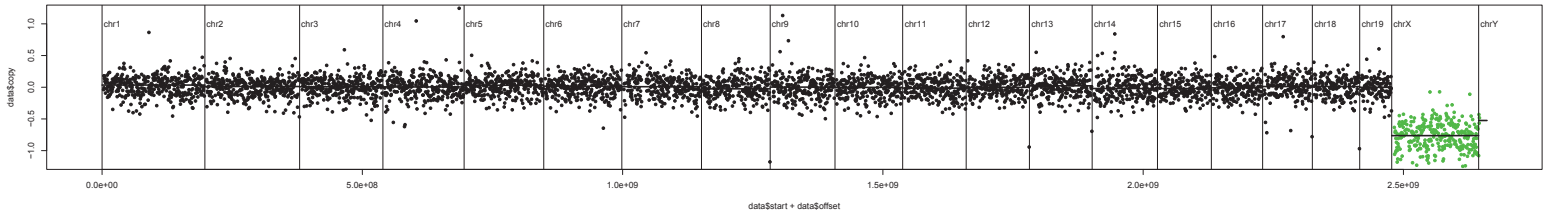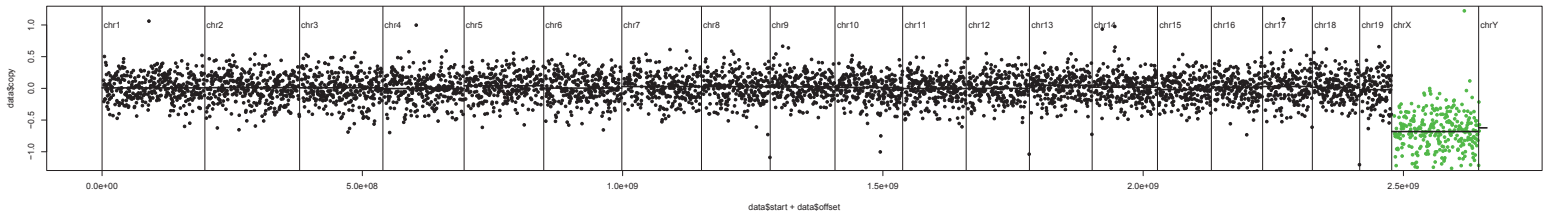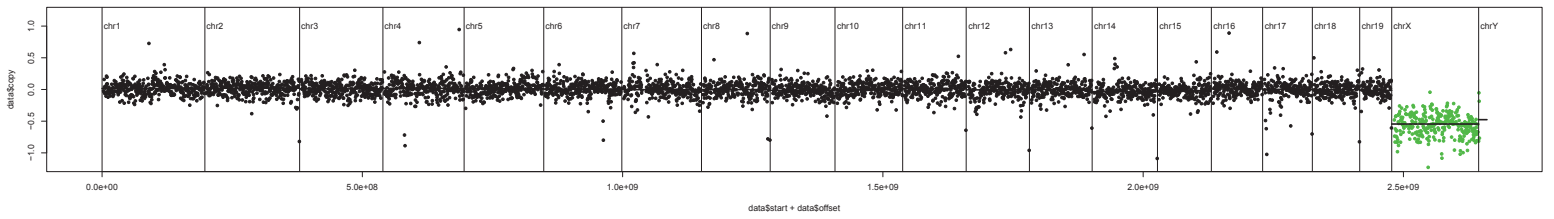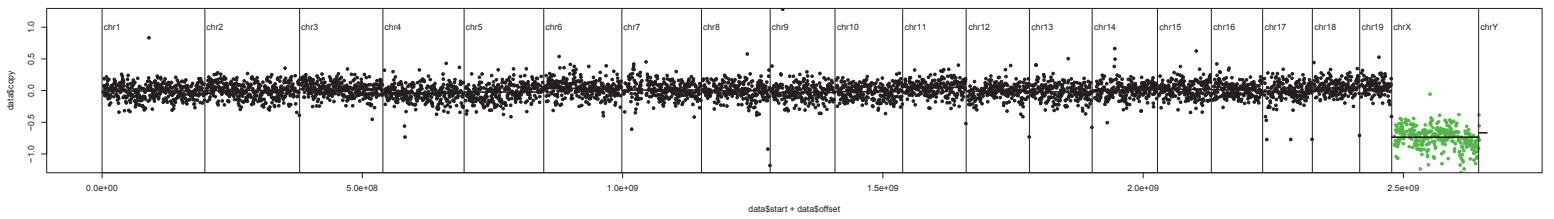

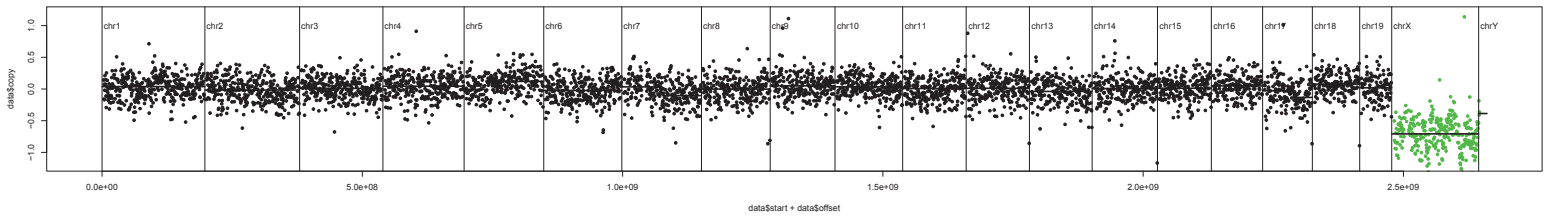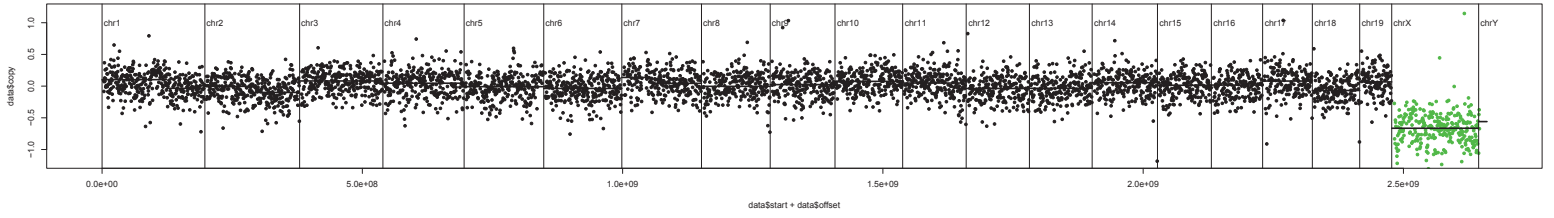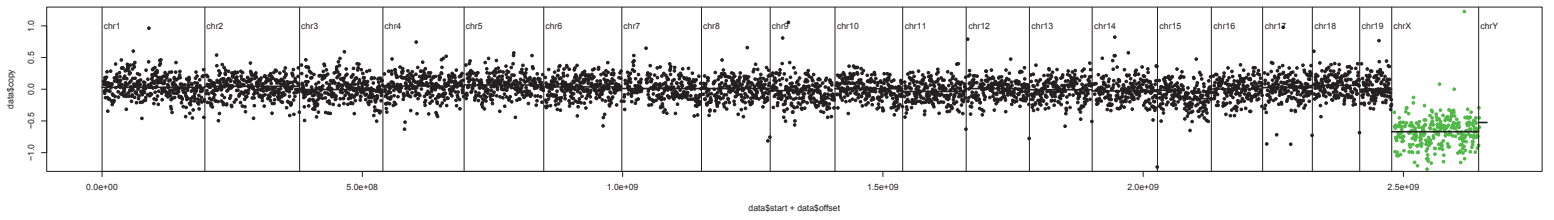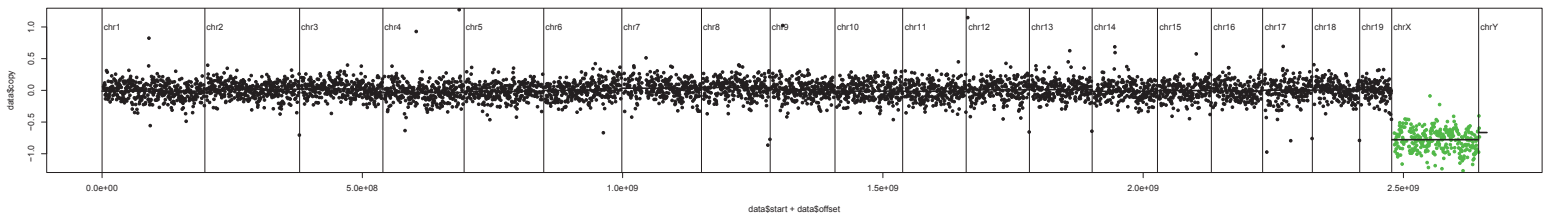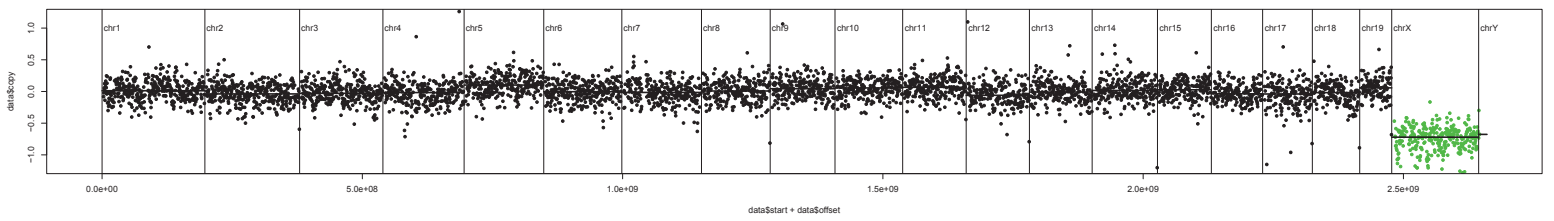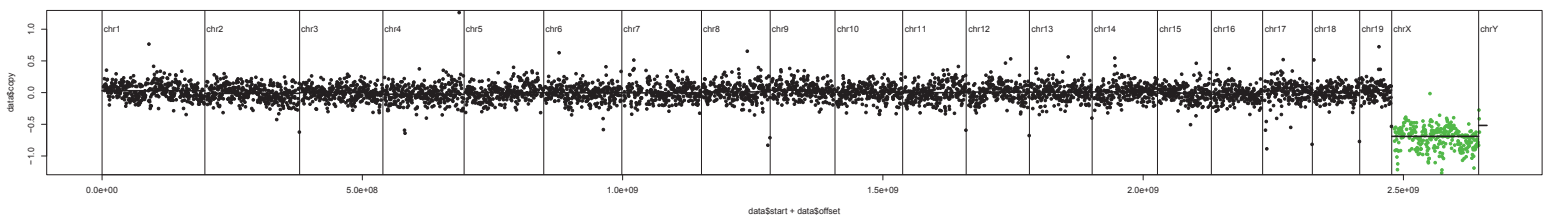

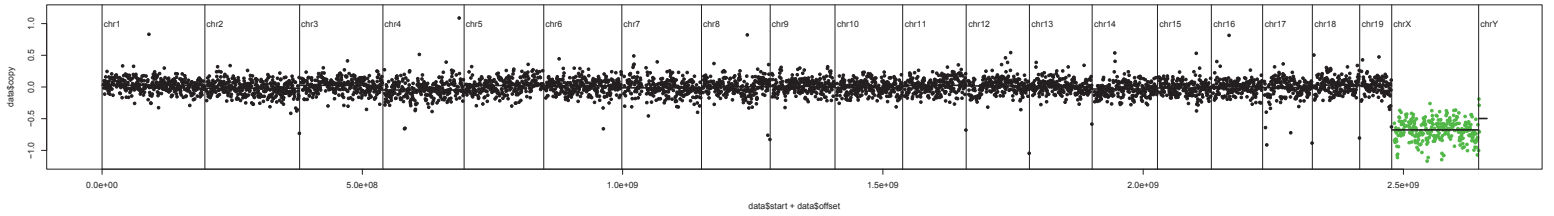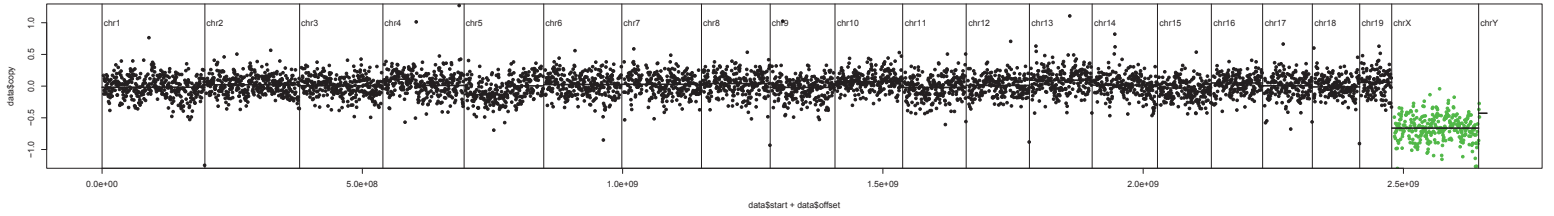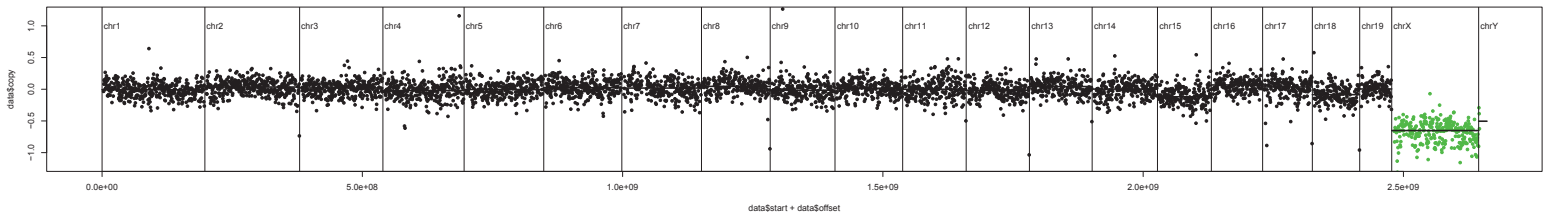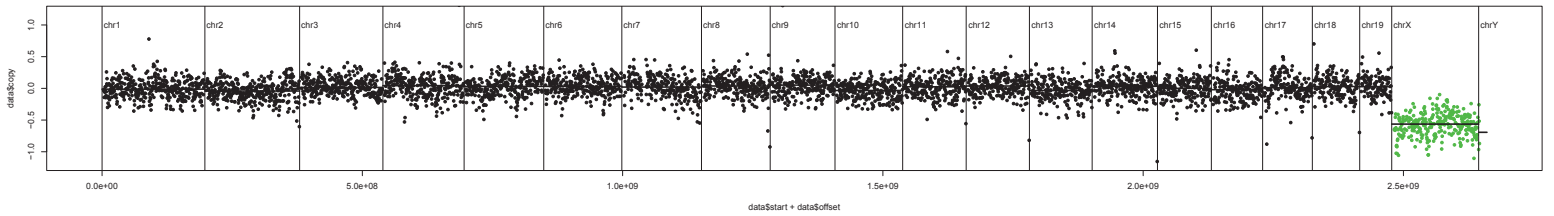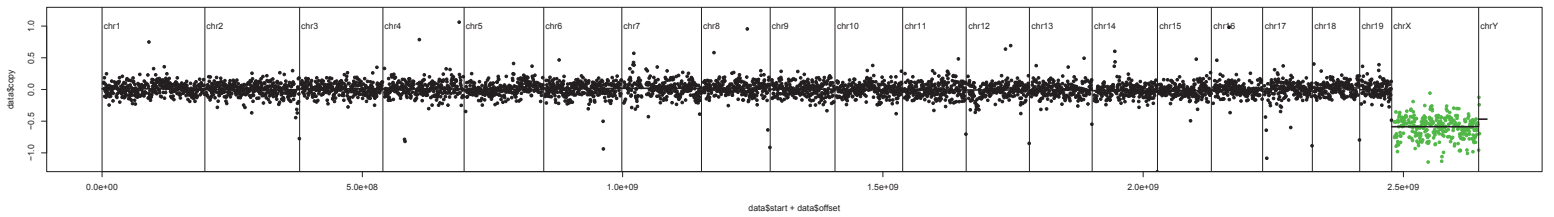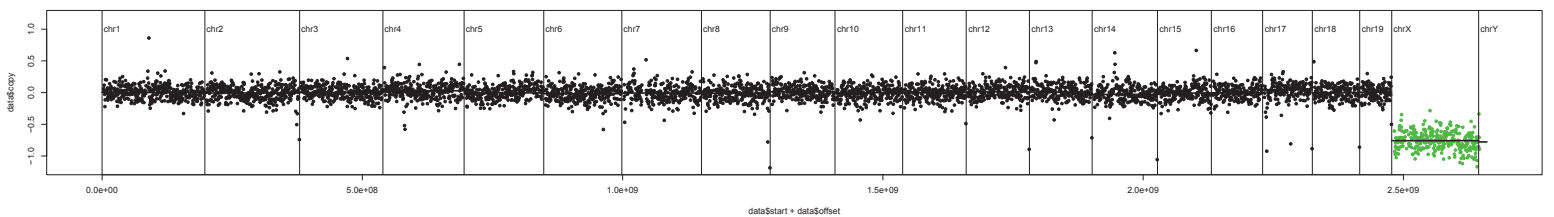

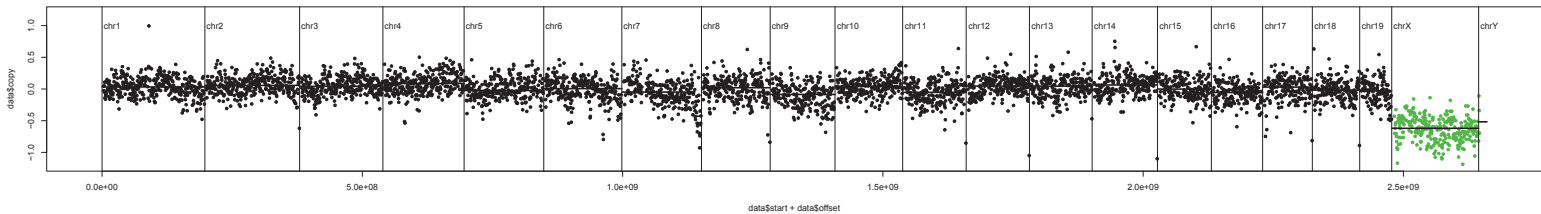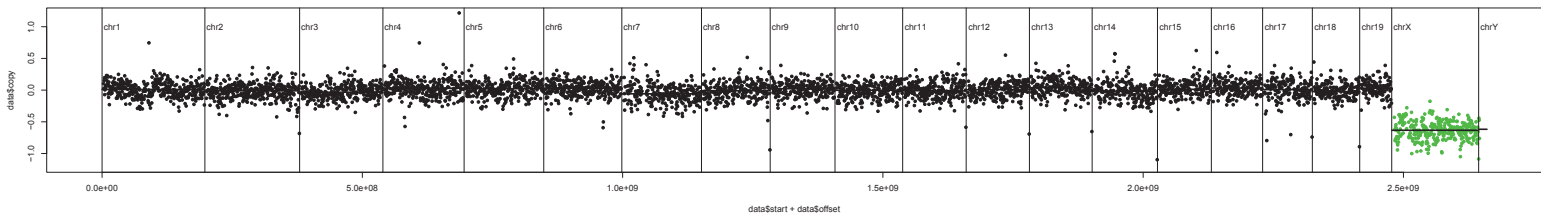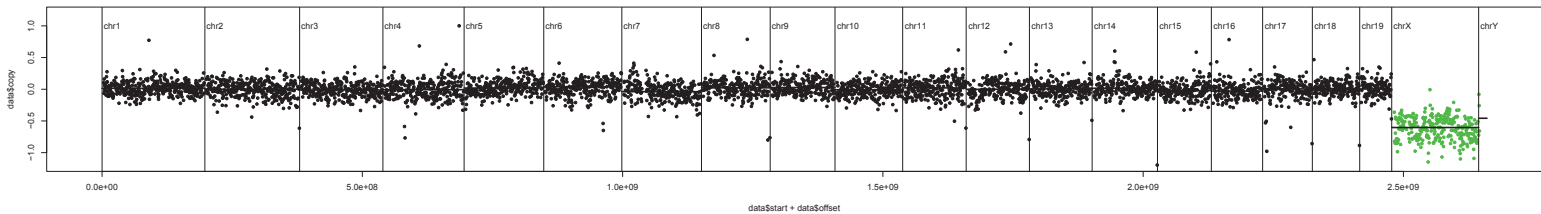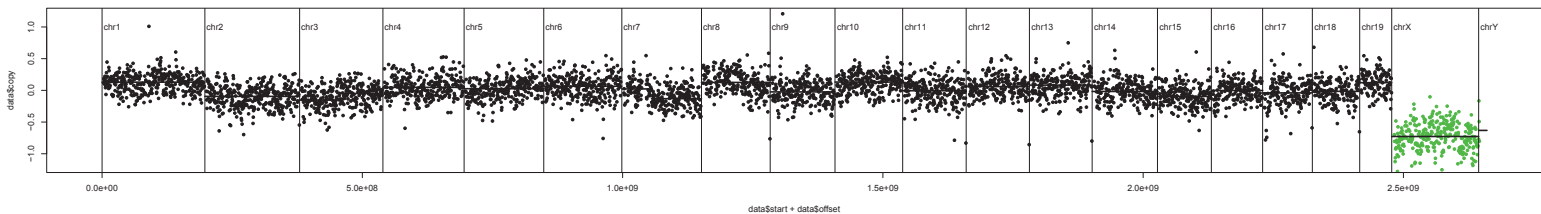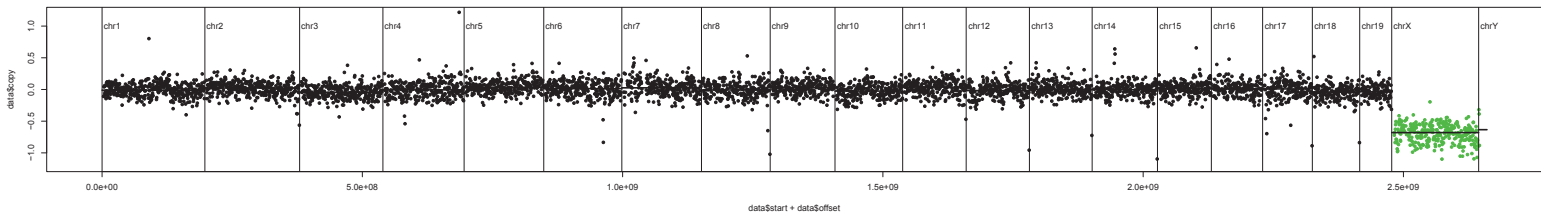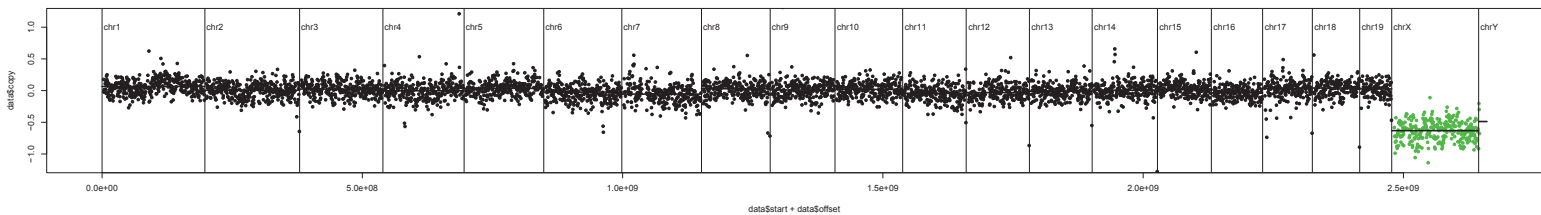



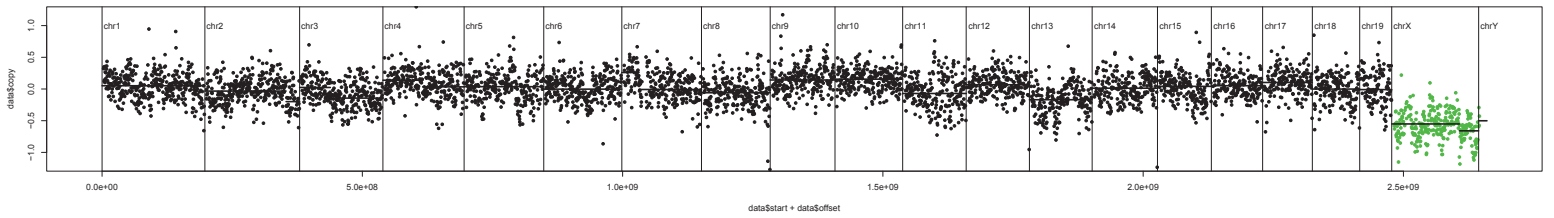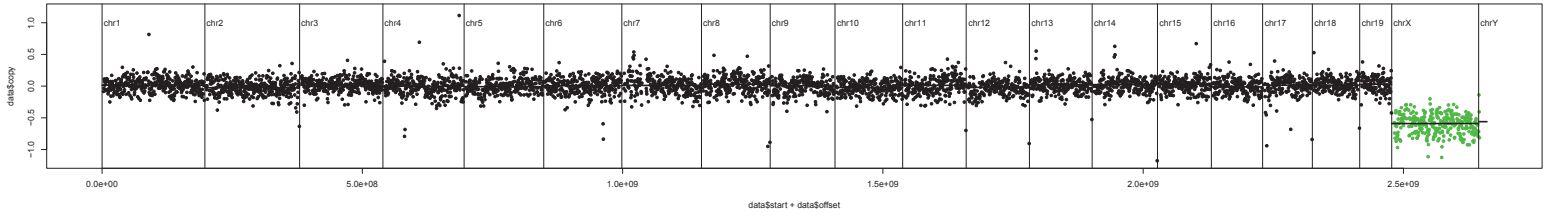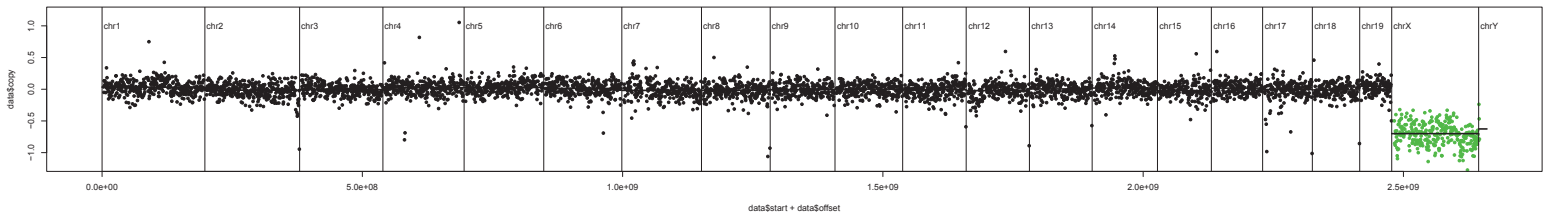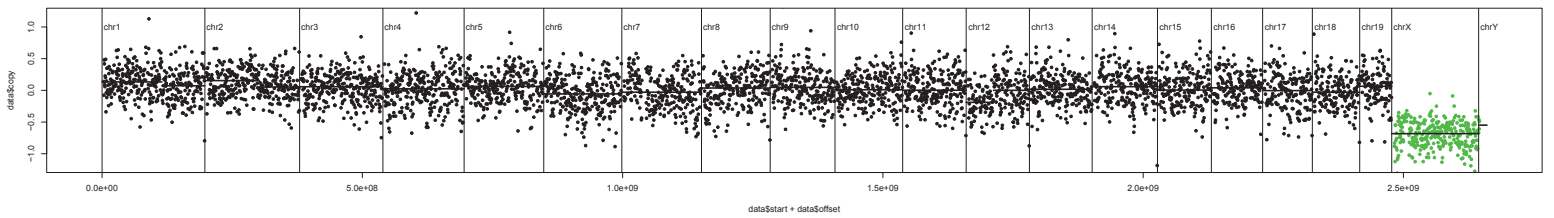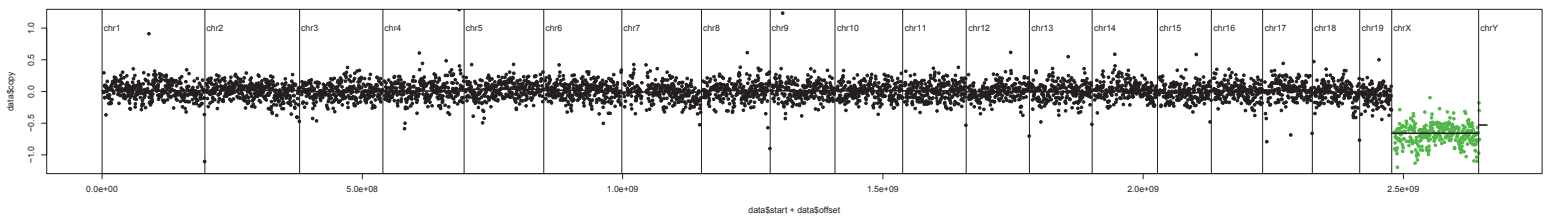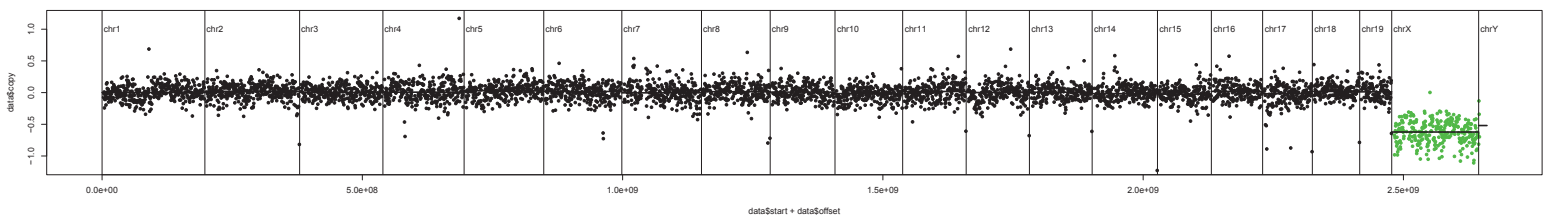

# Human Hepatocyte Nuclei

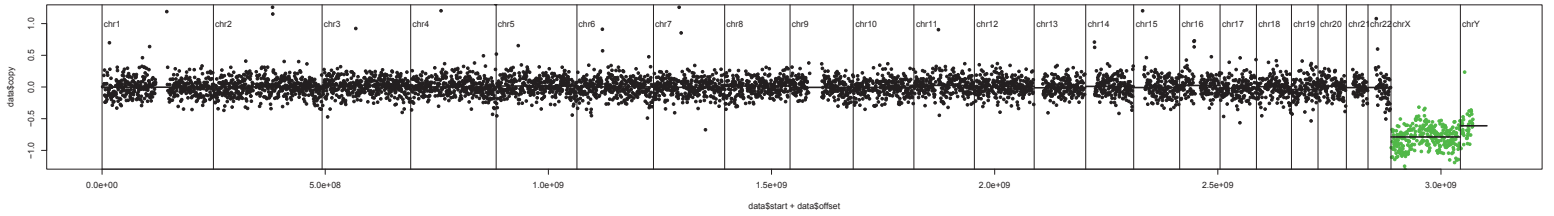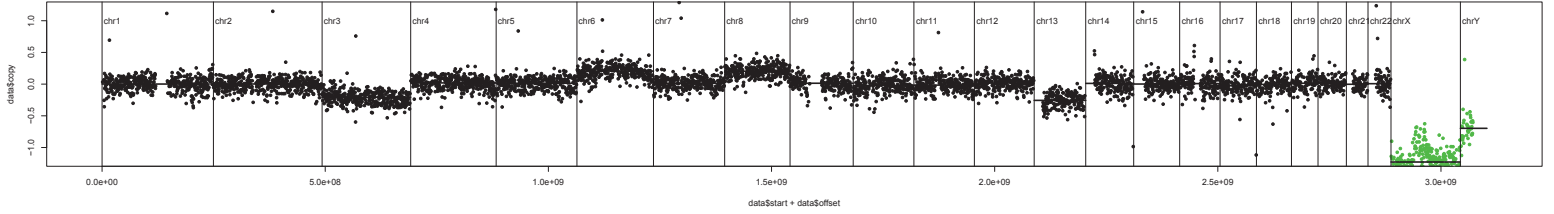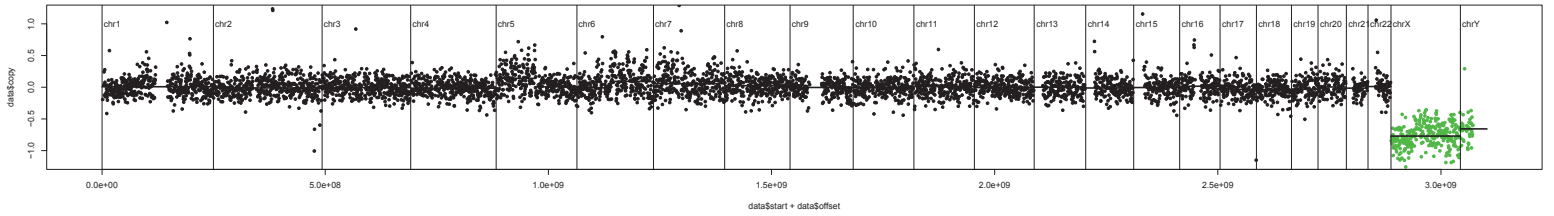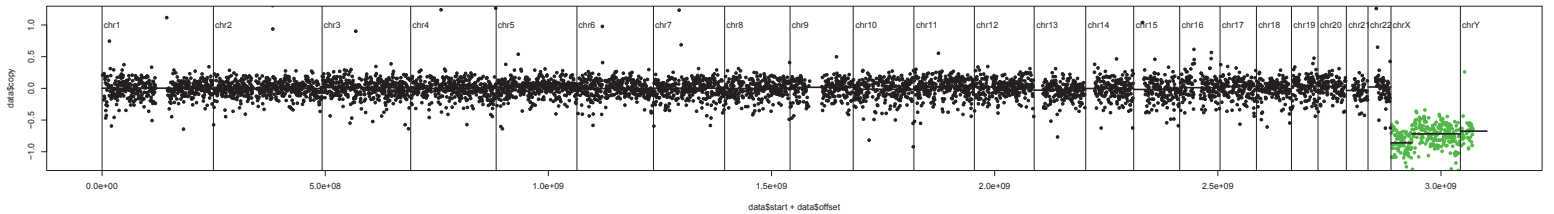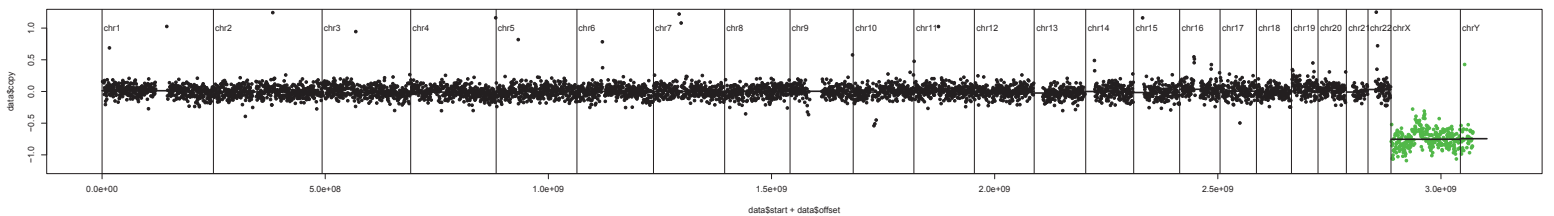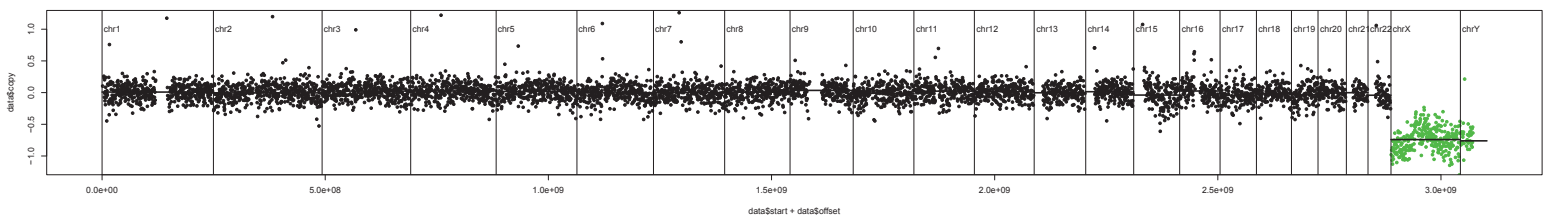

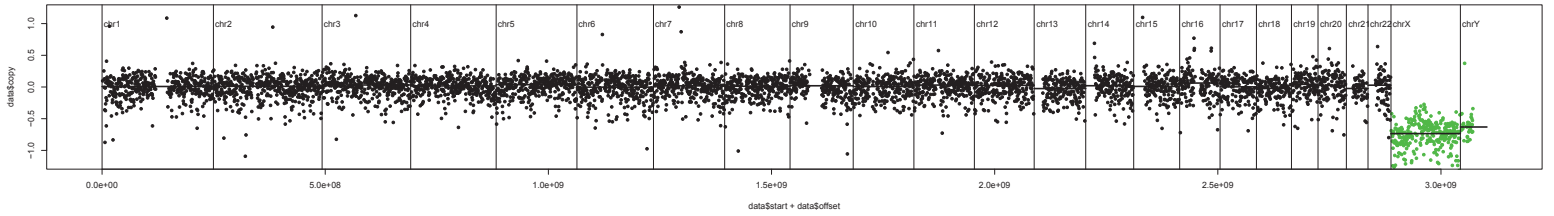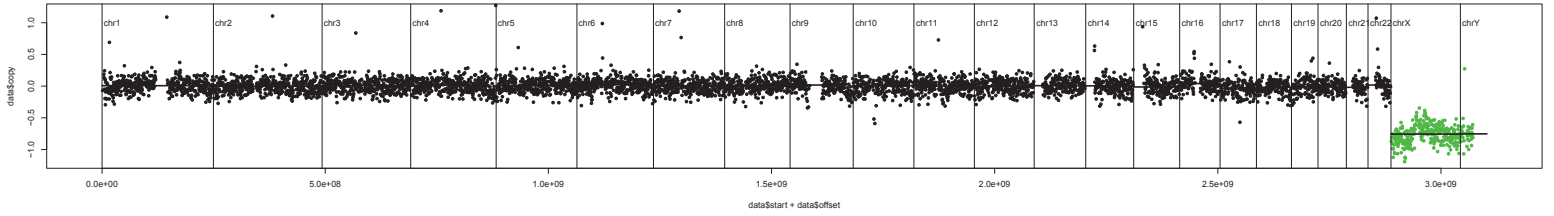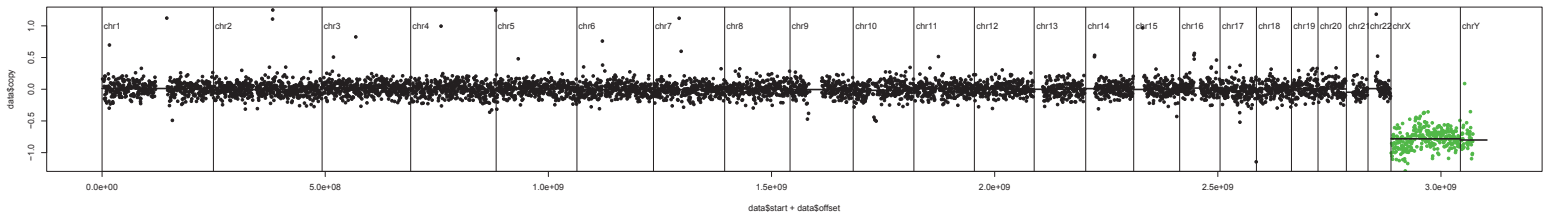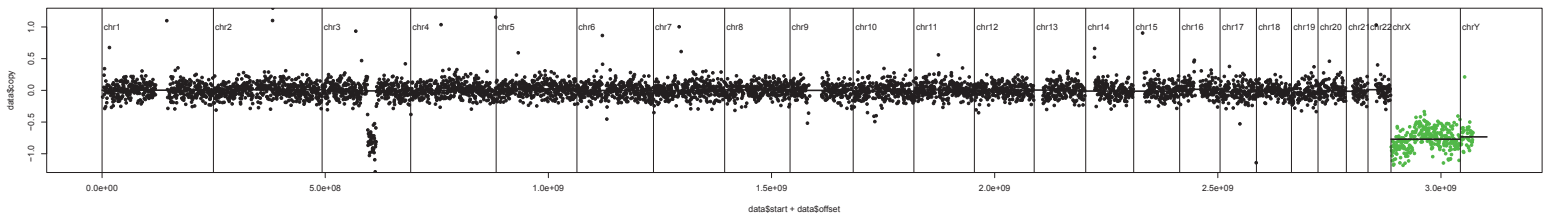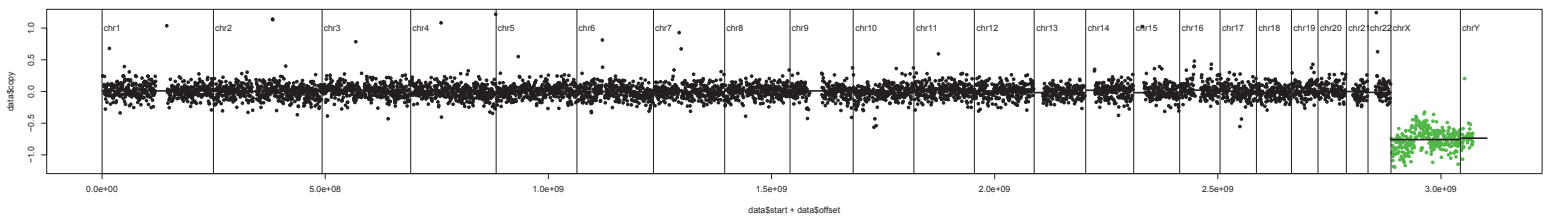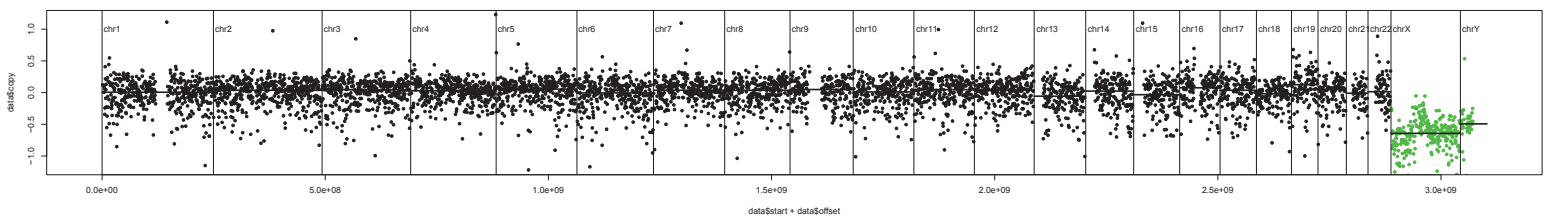

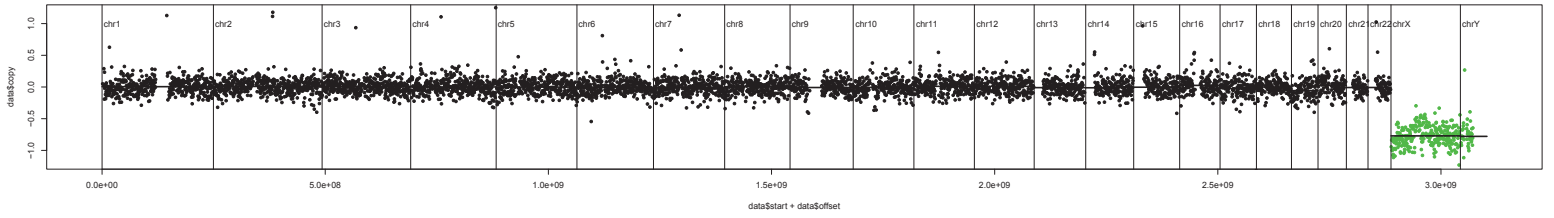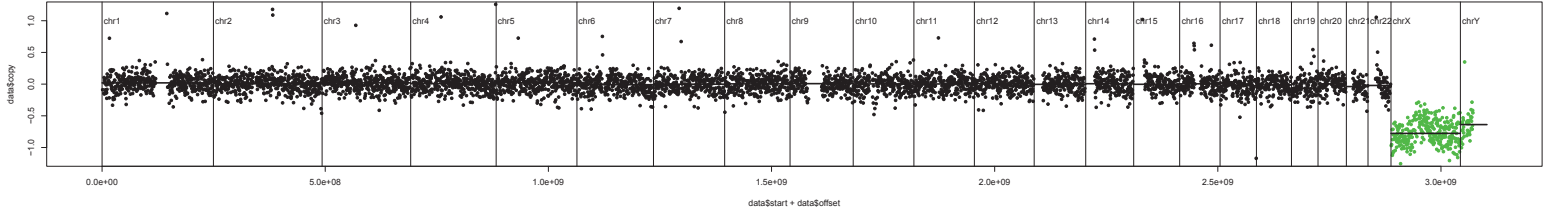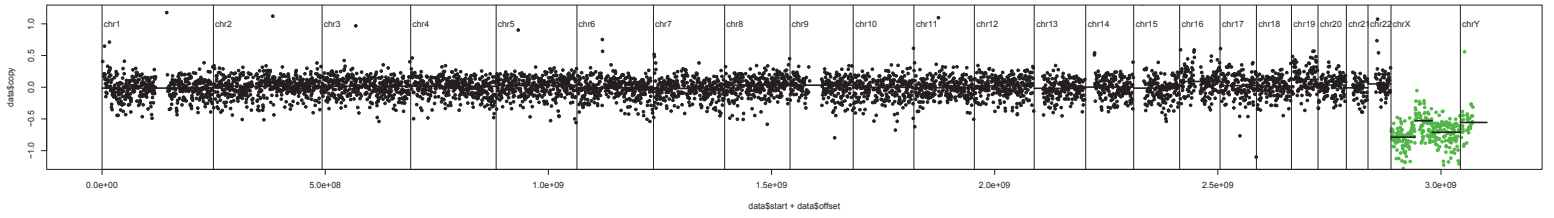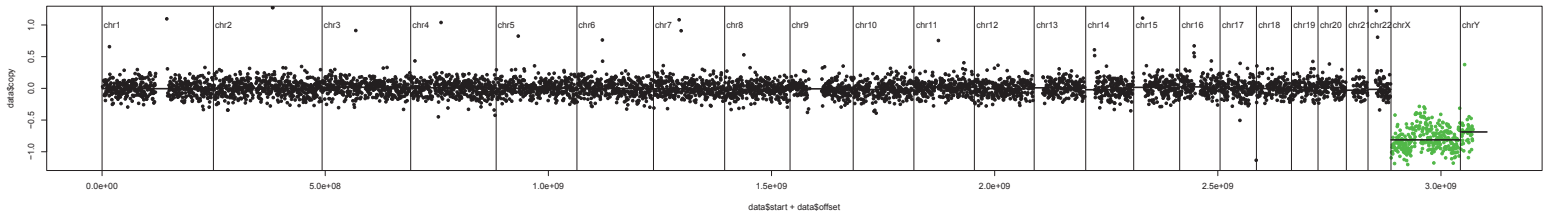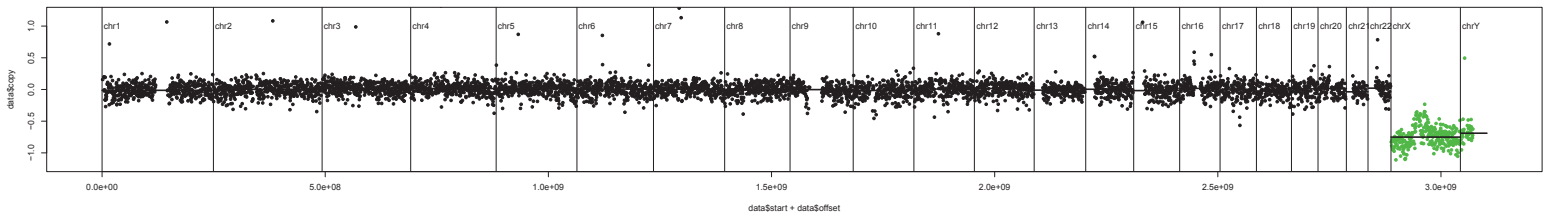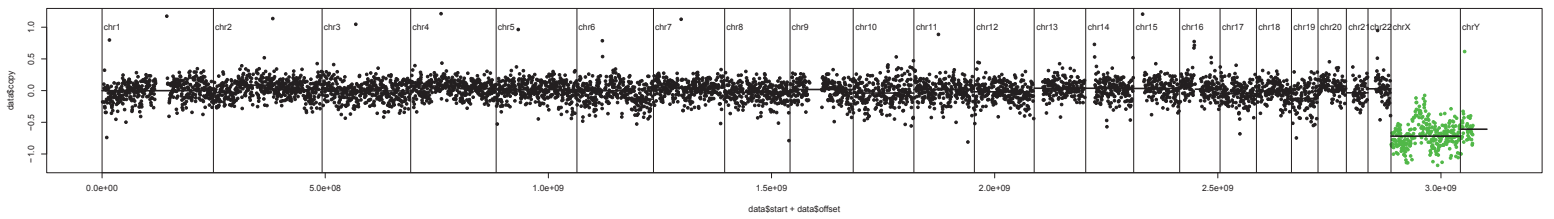

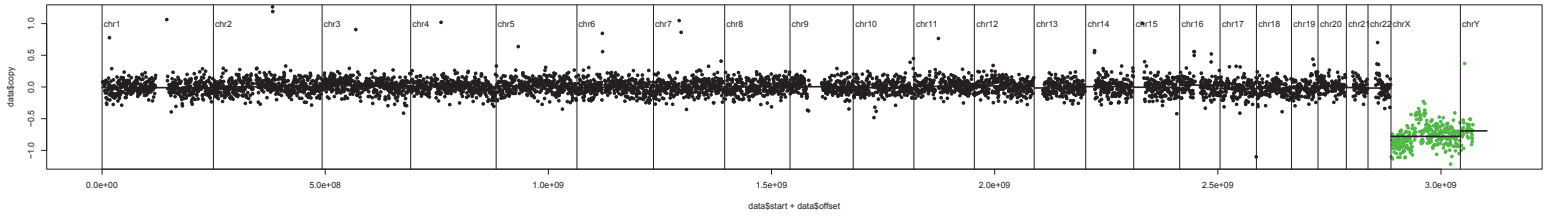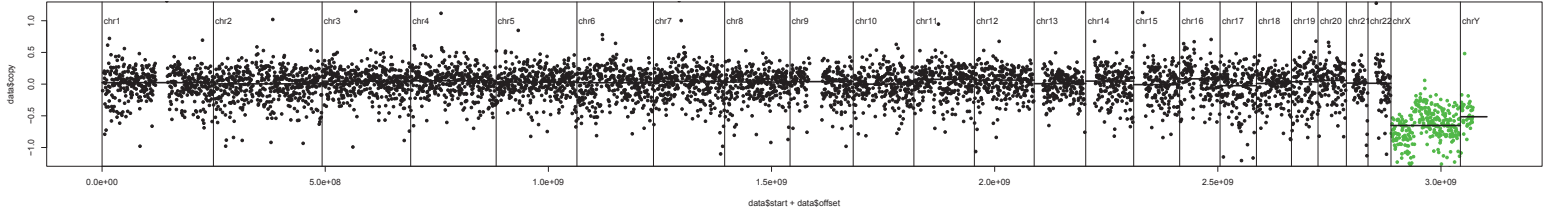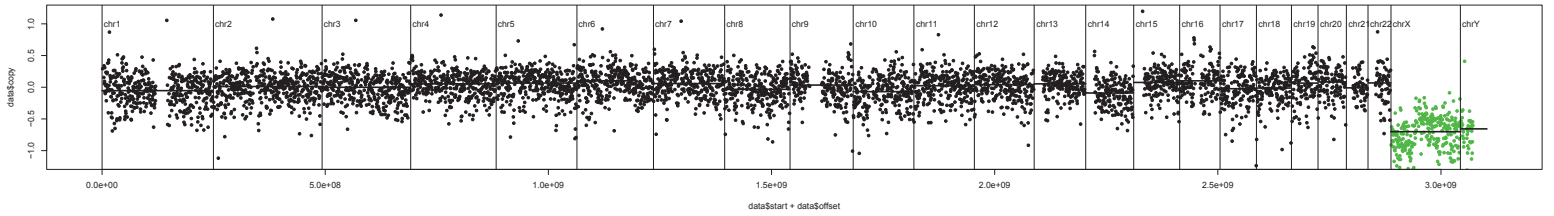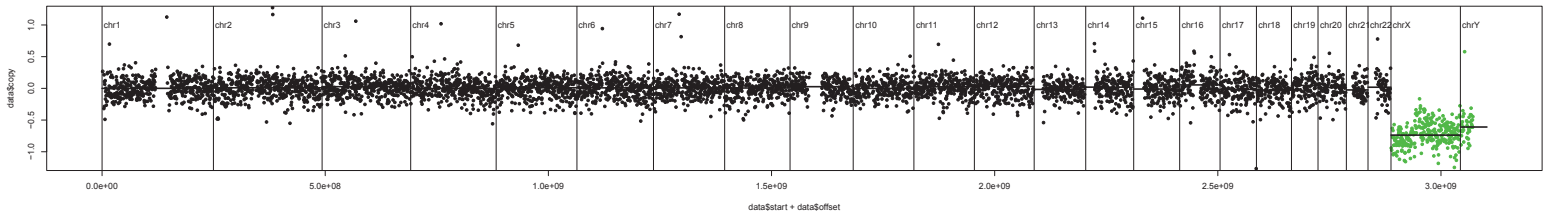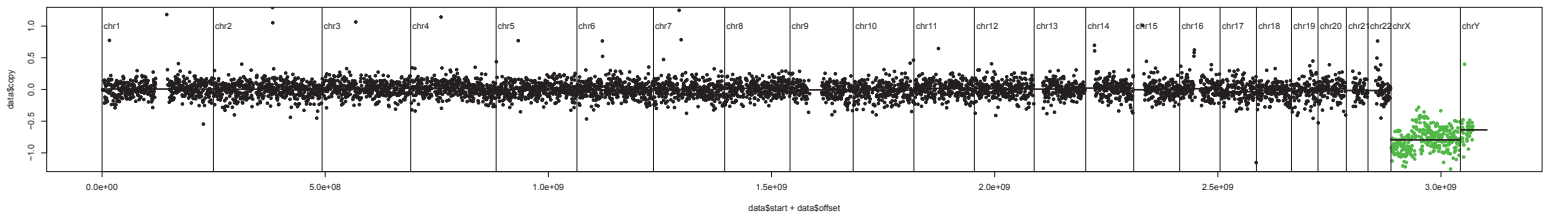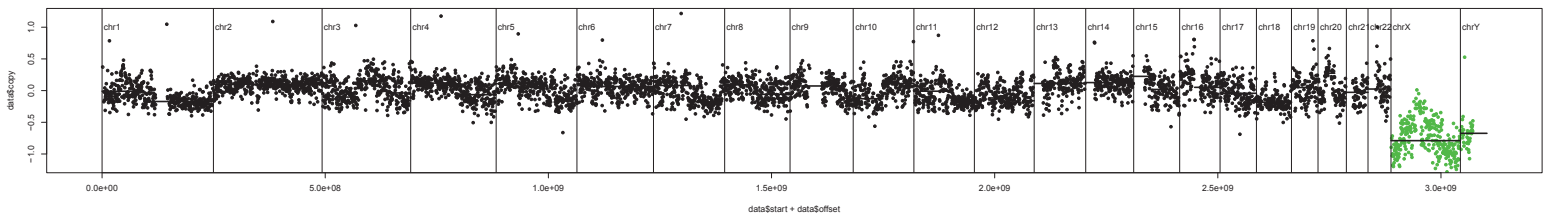

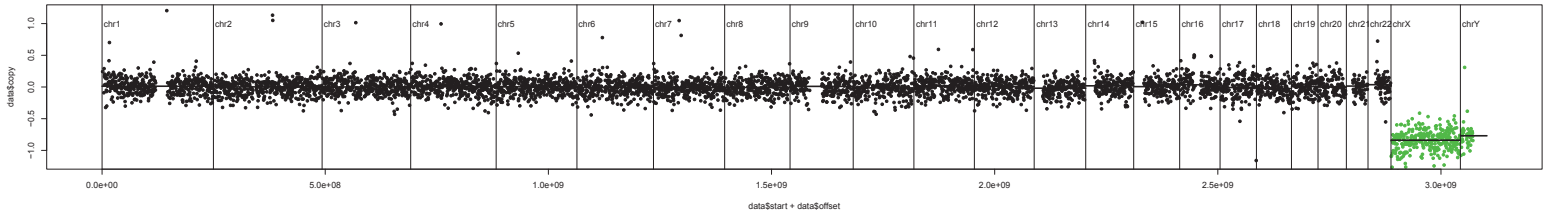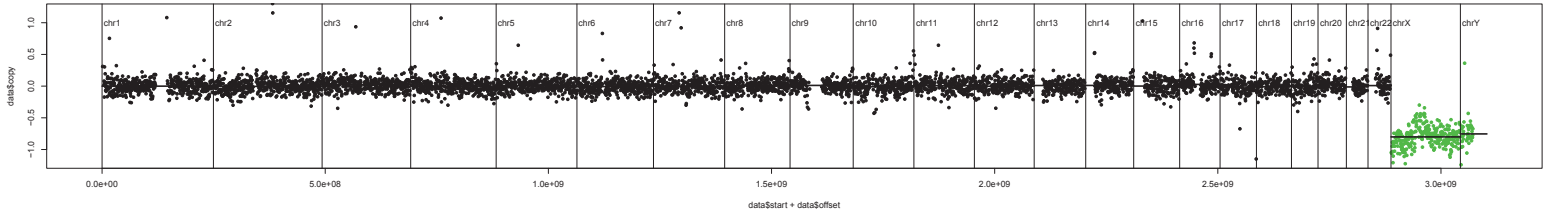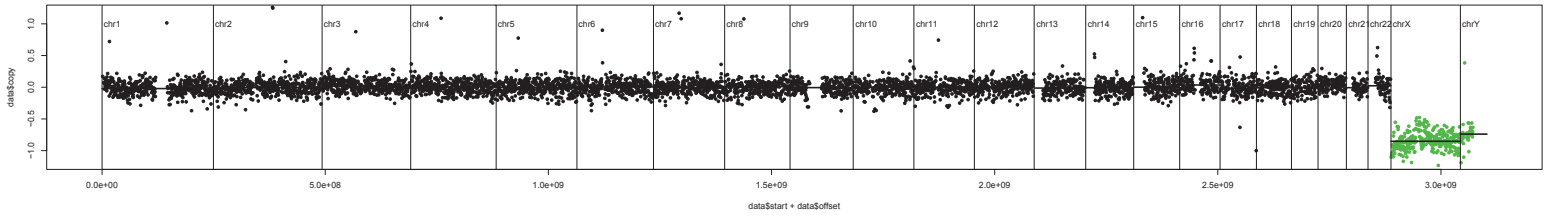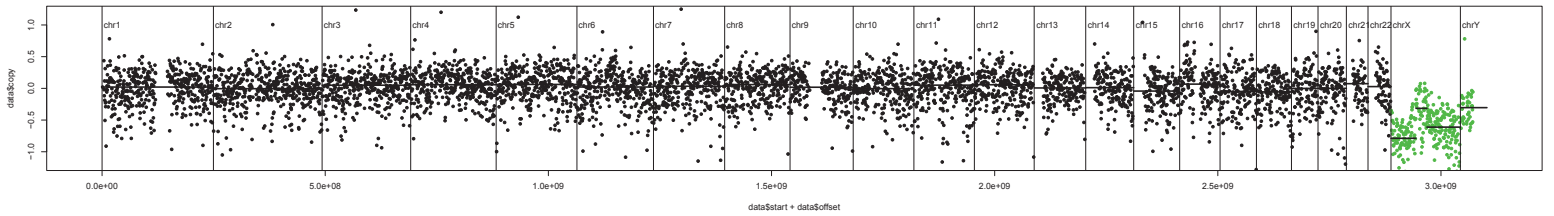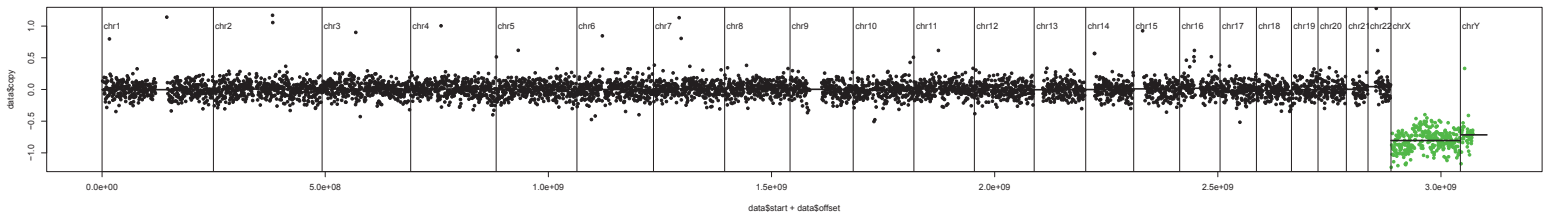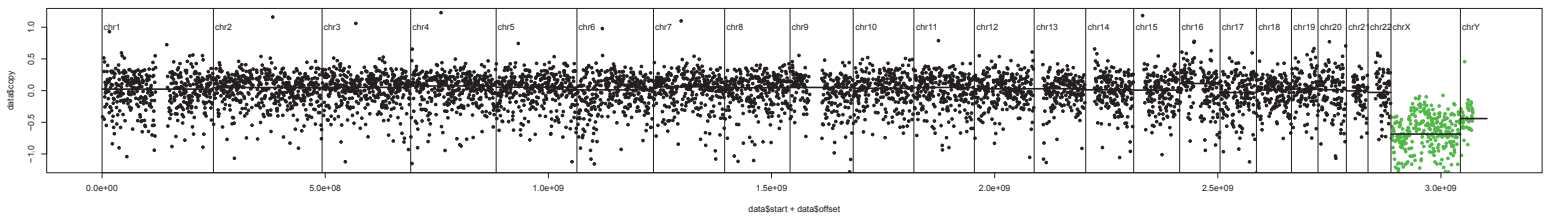

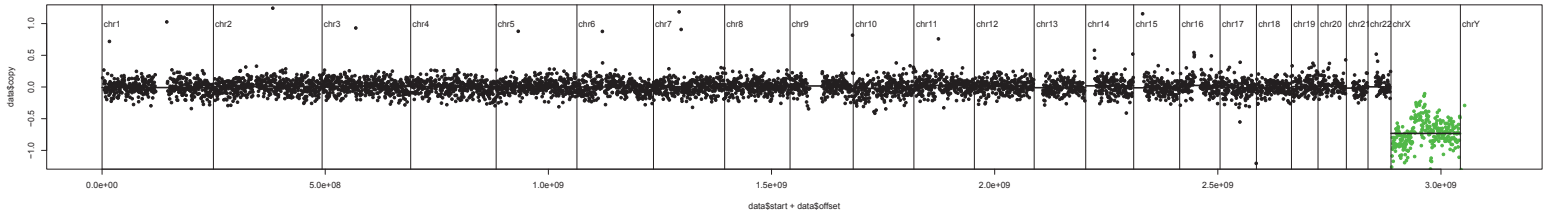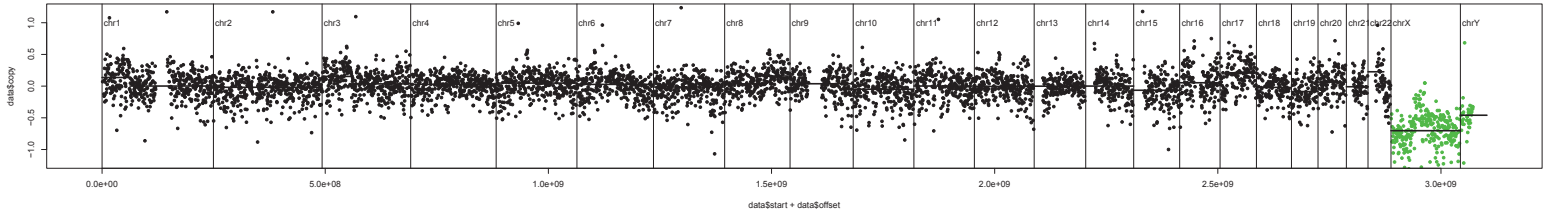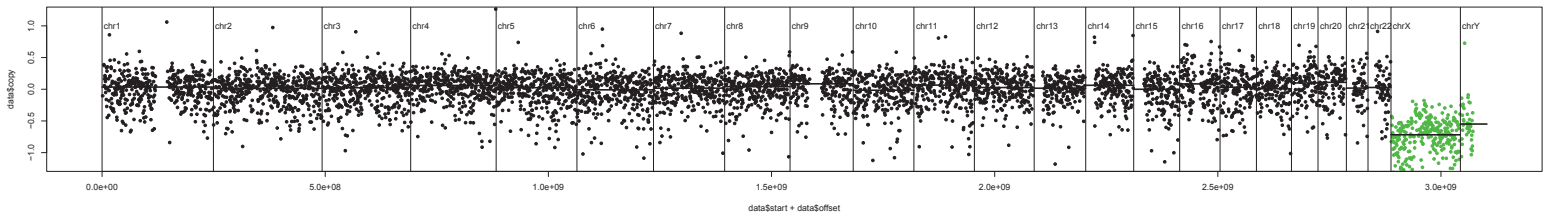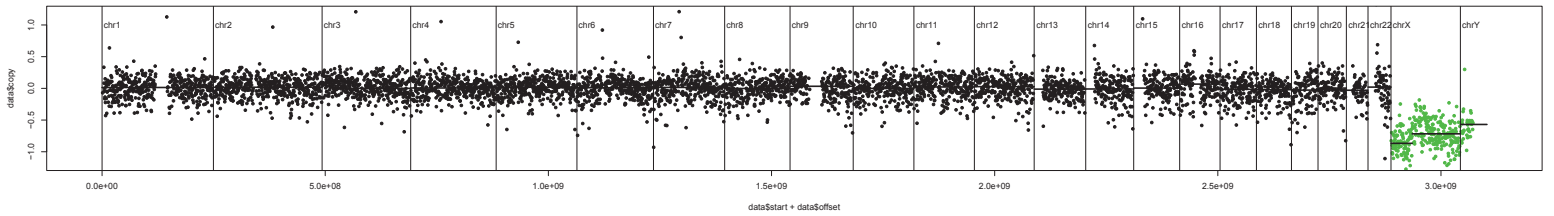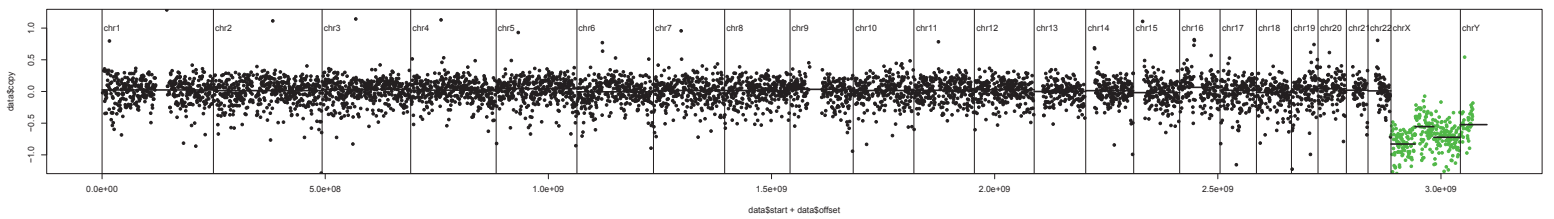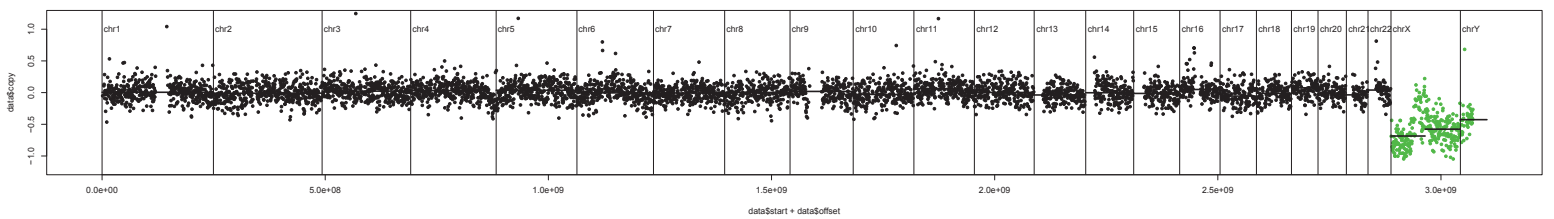

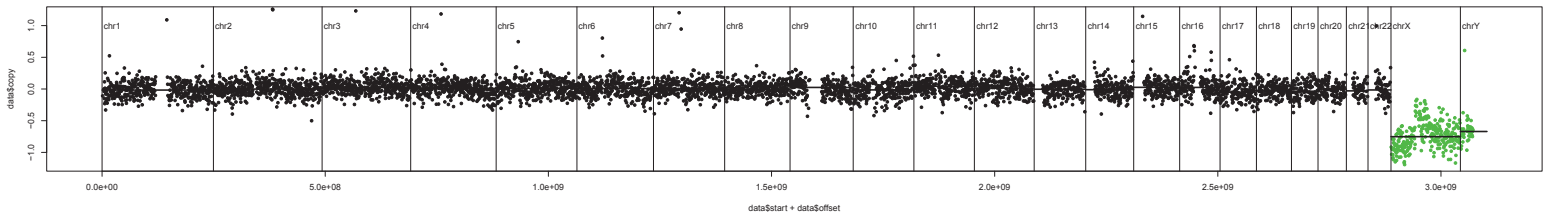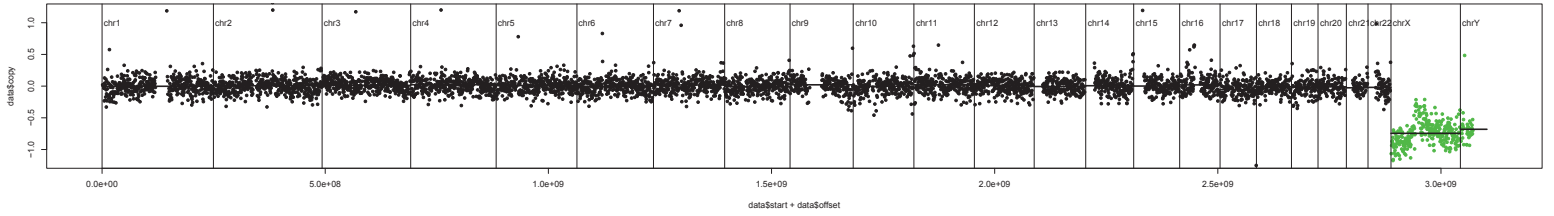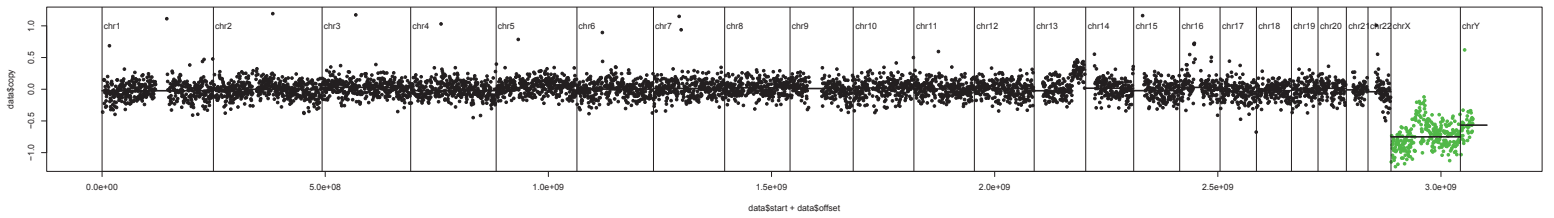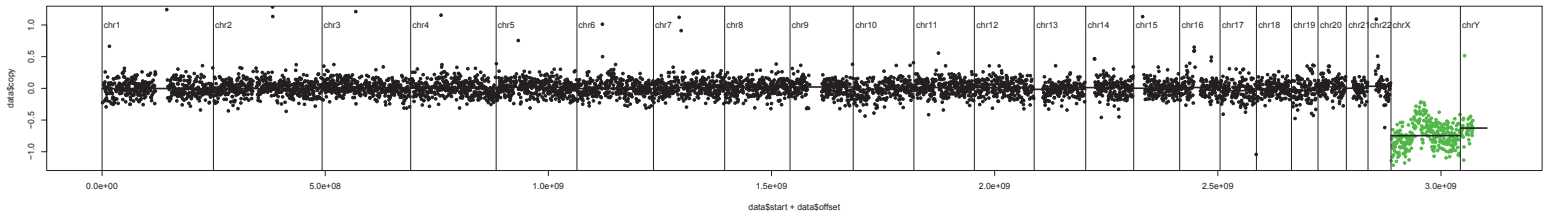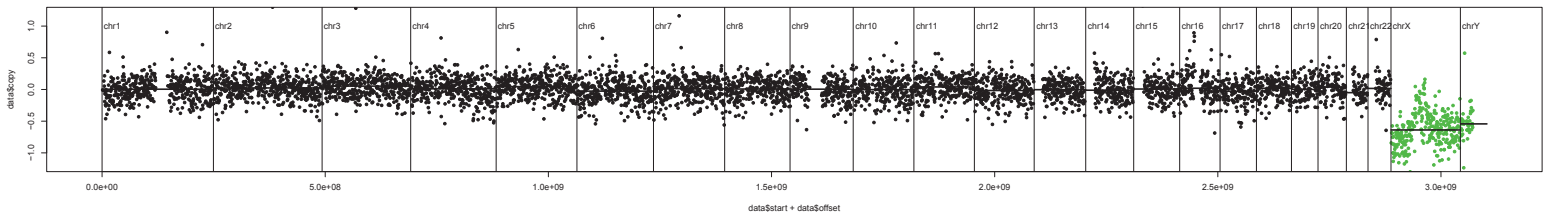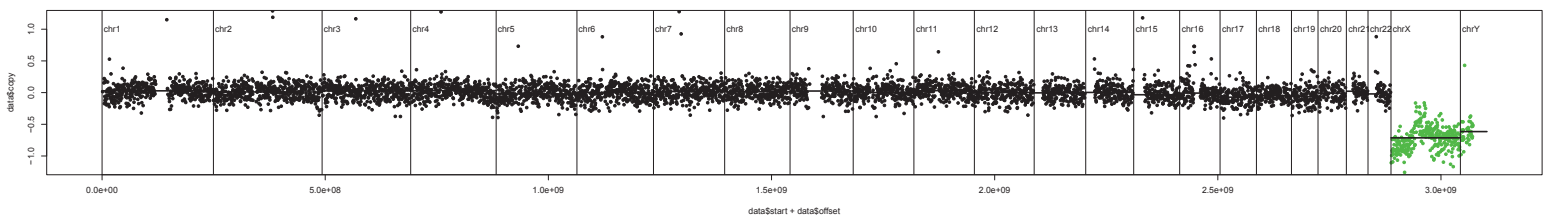



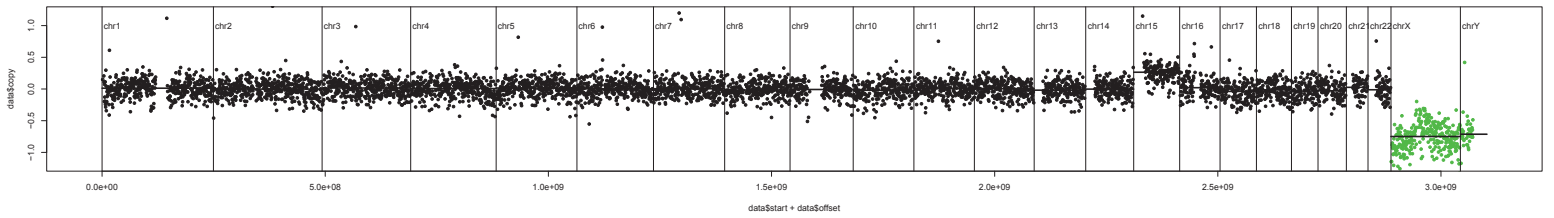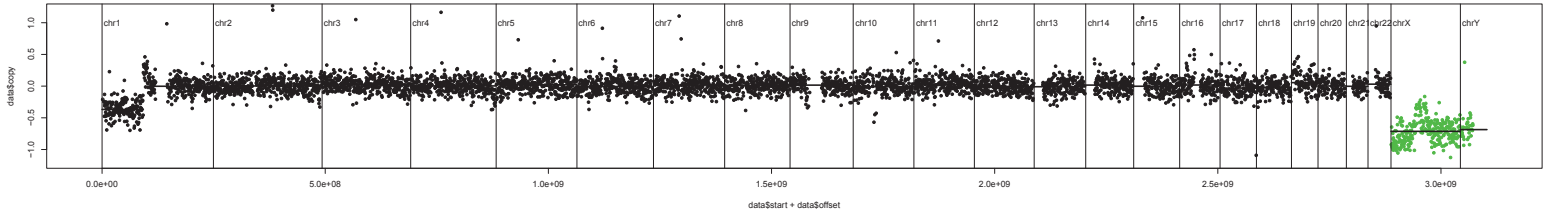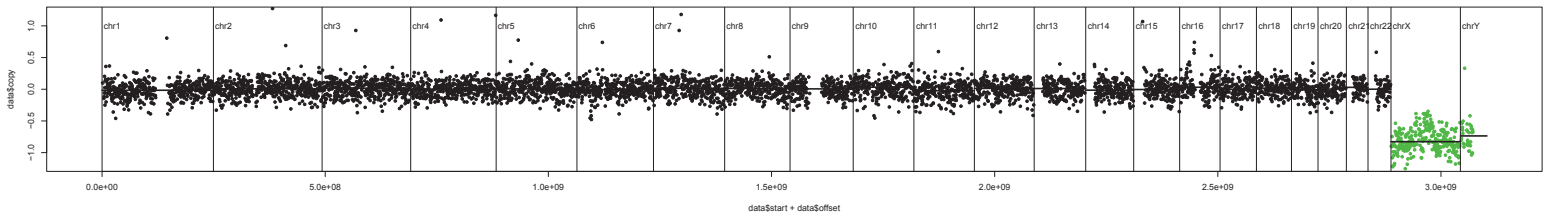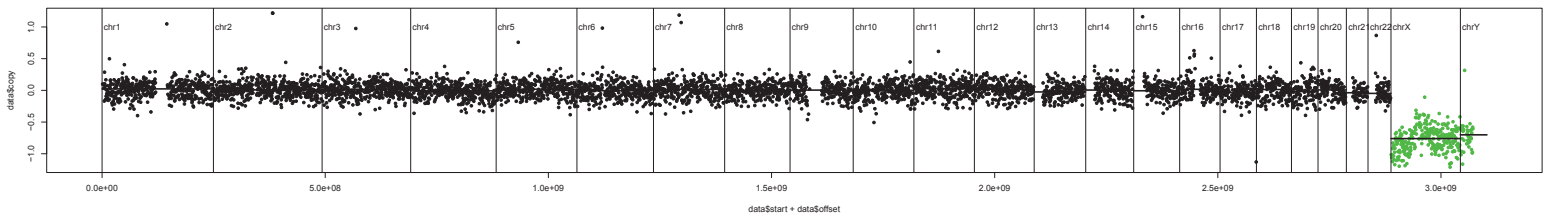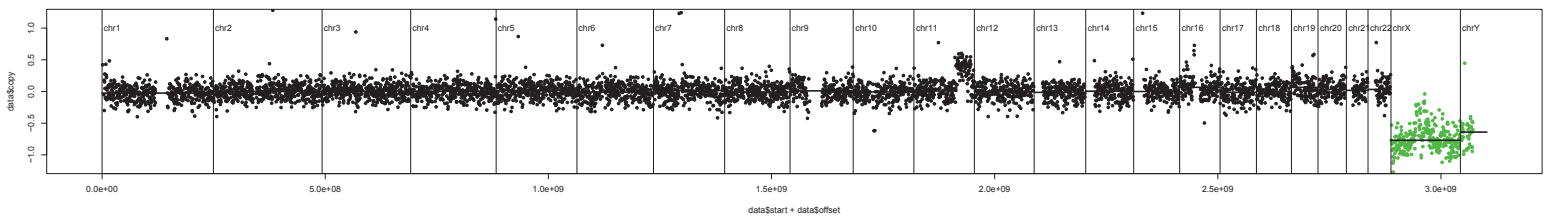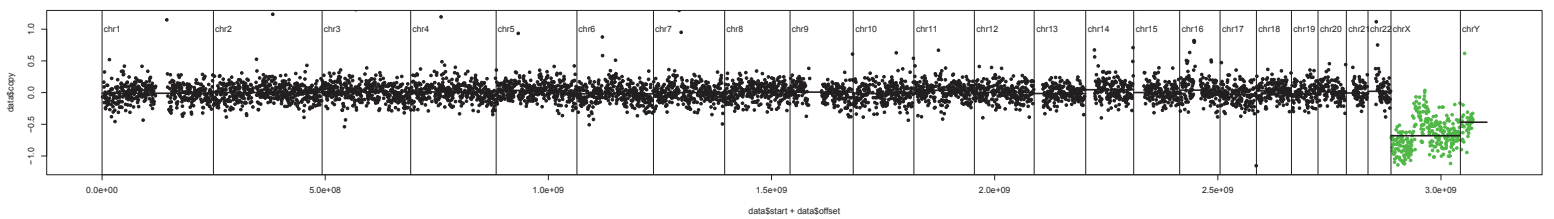

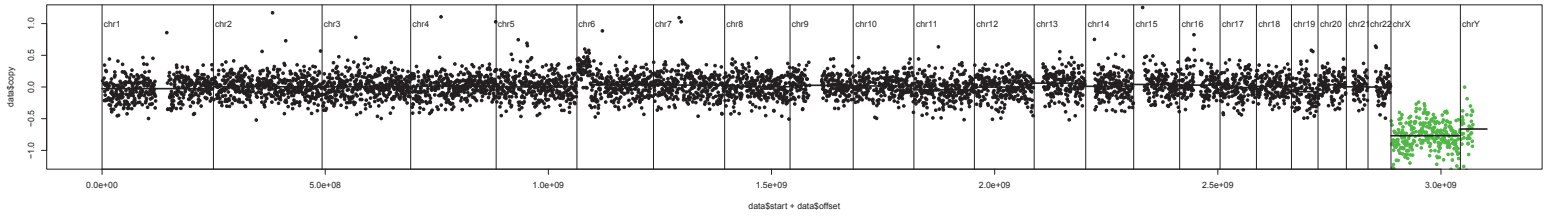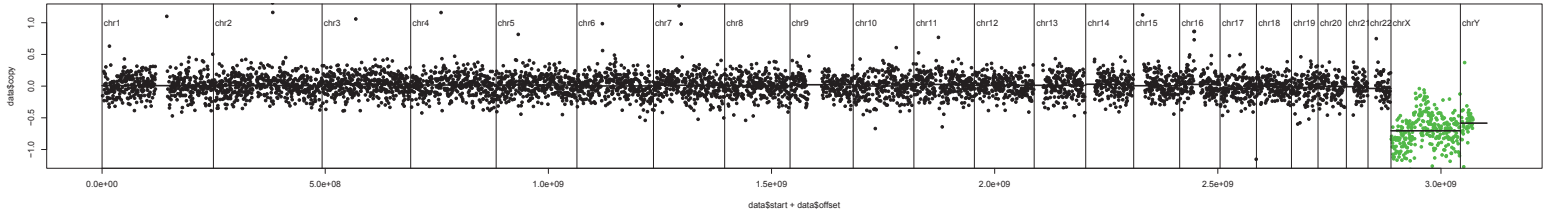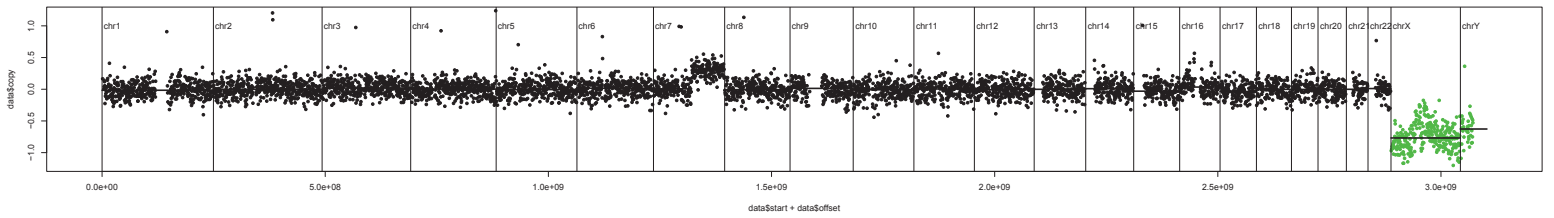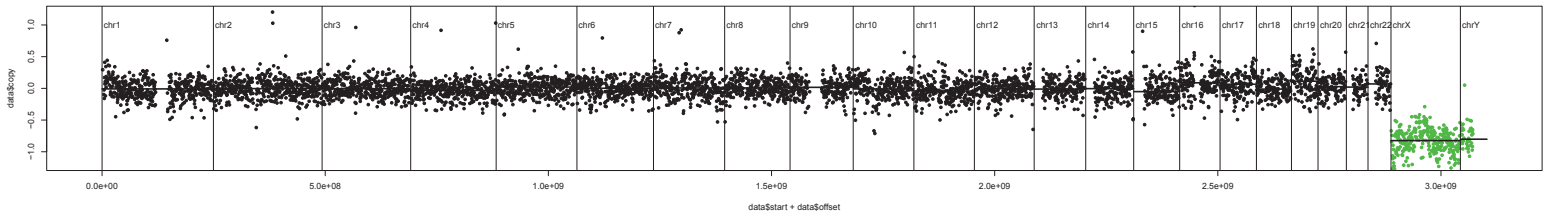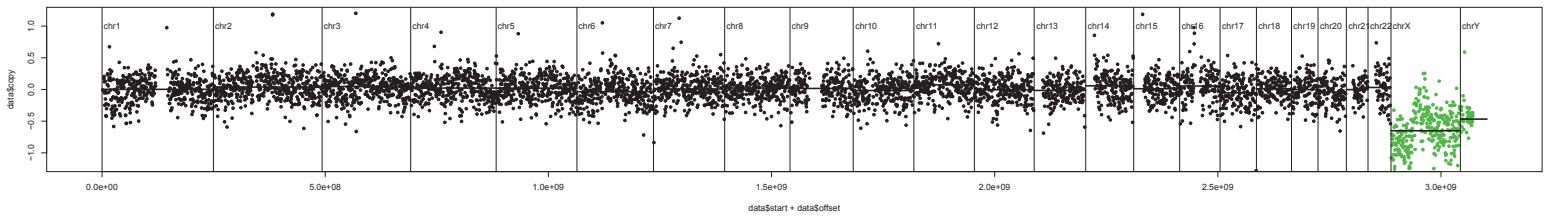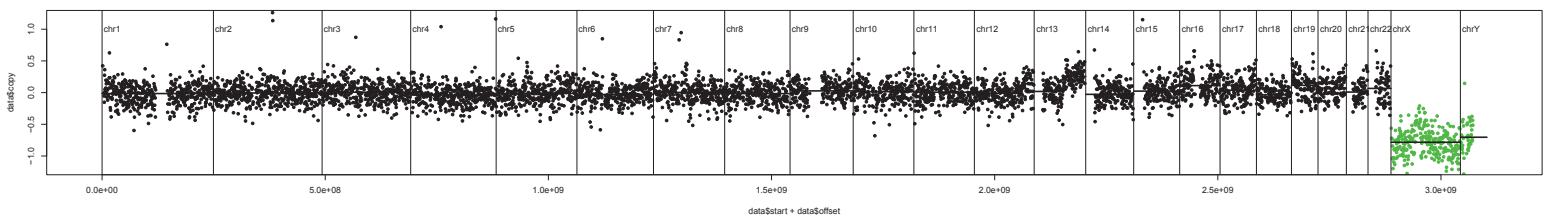

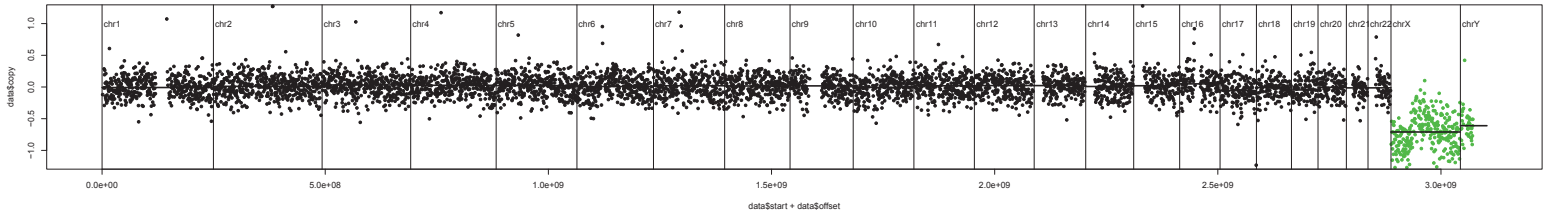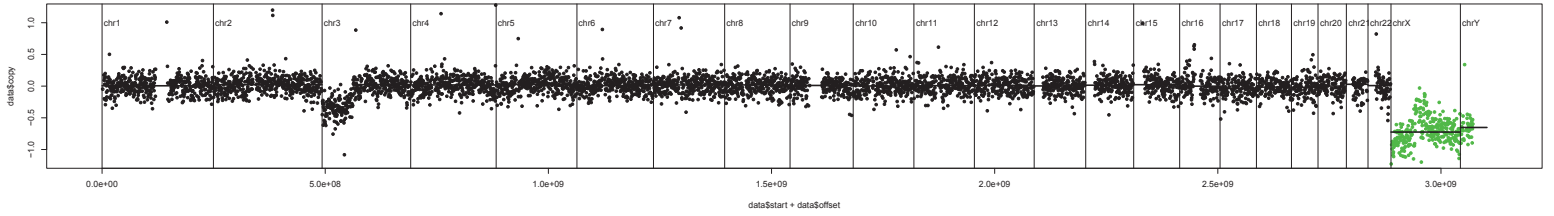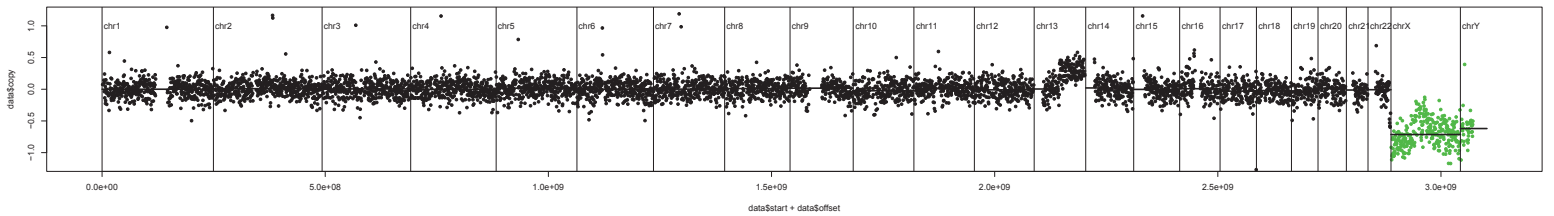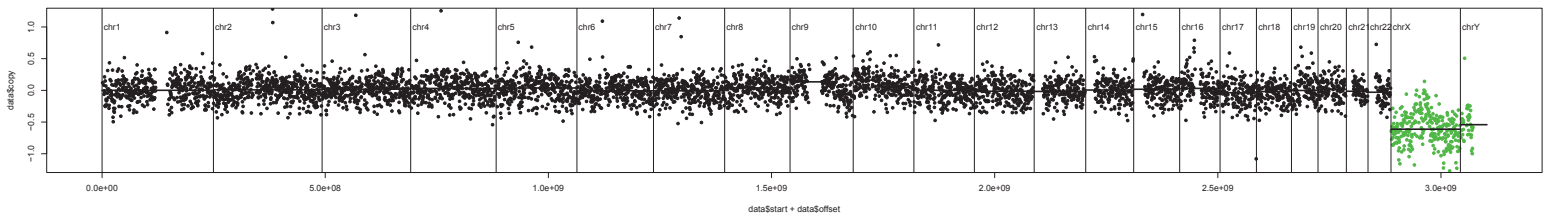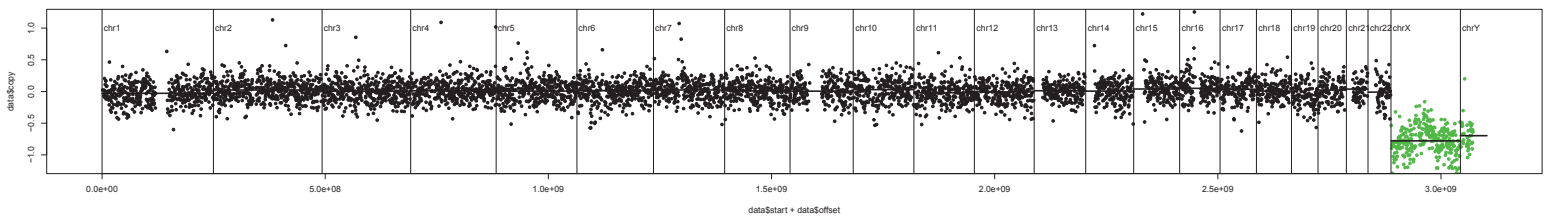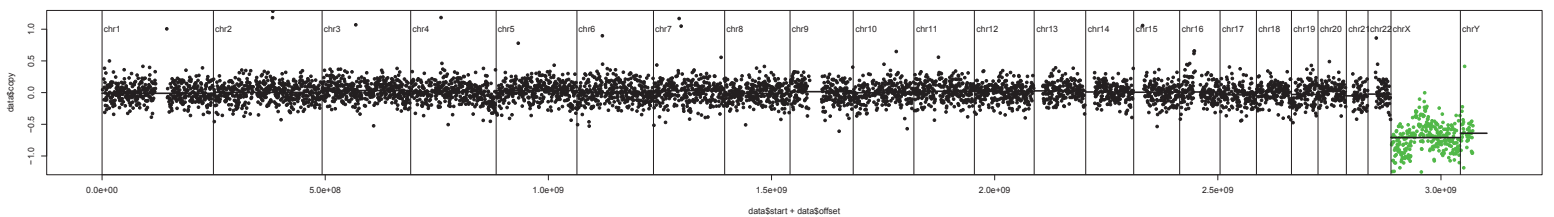

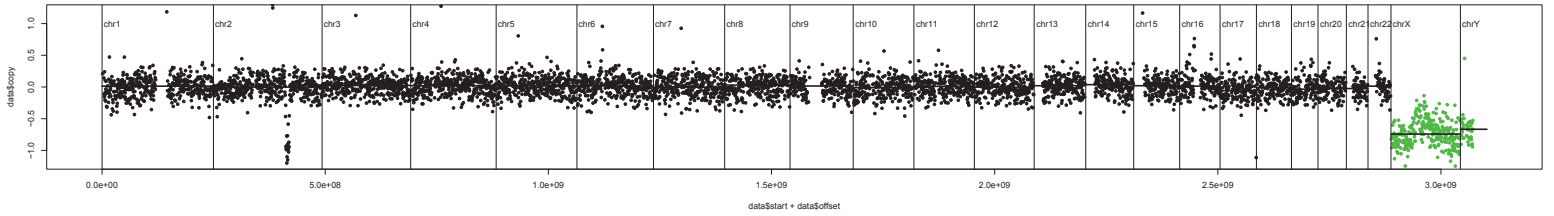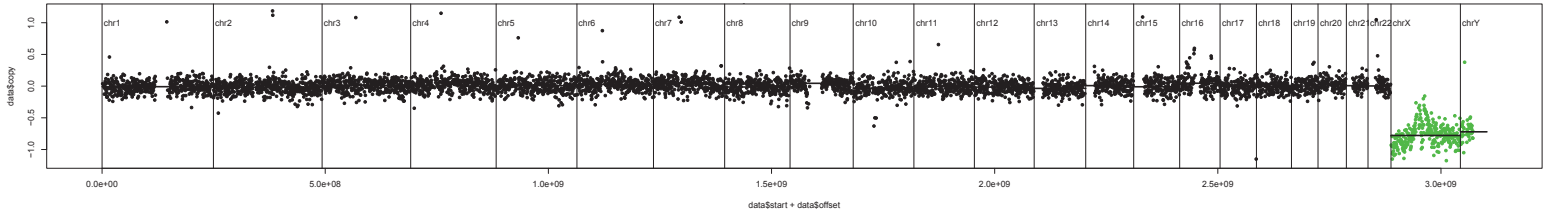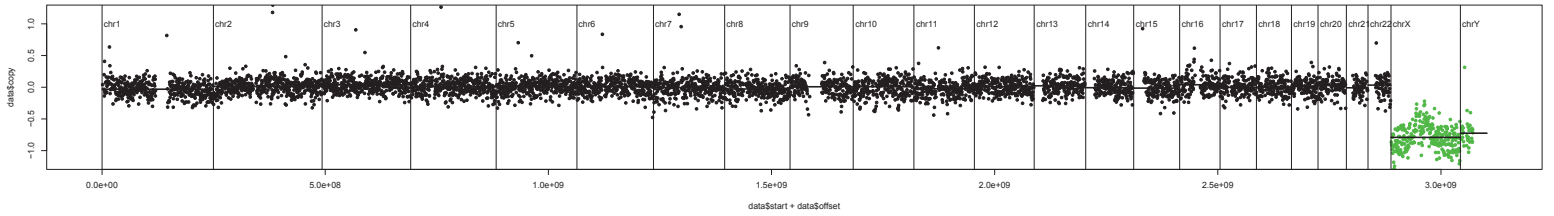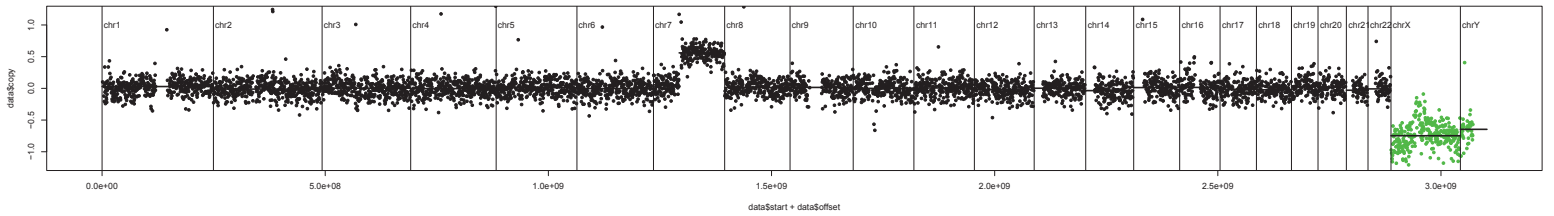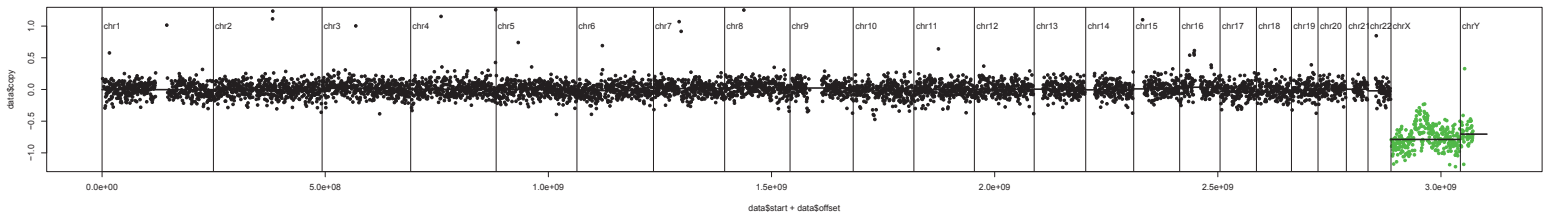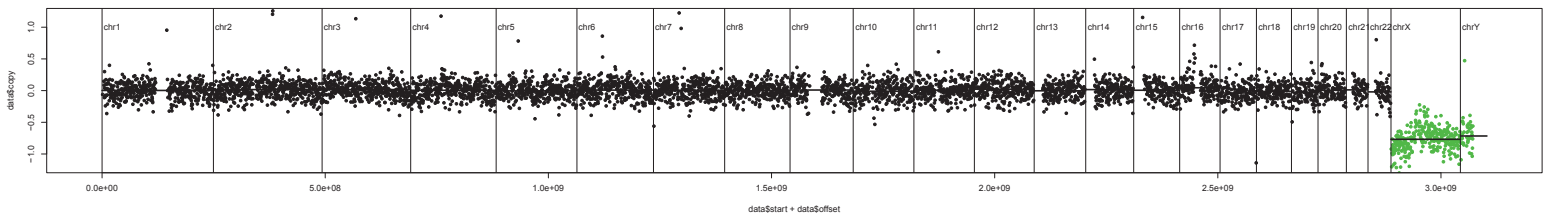

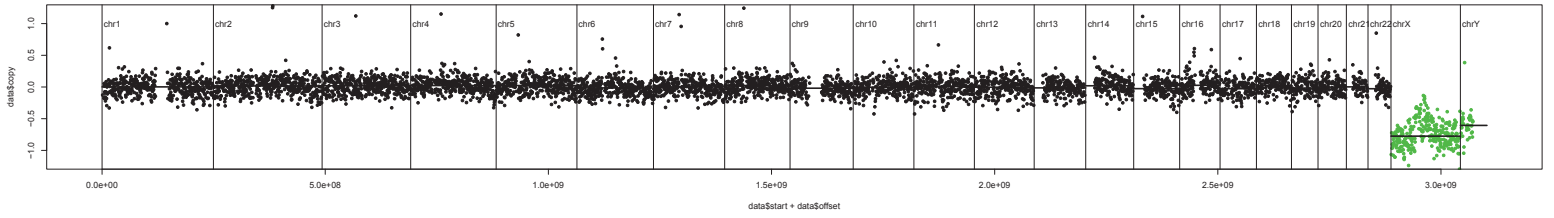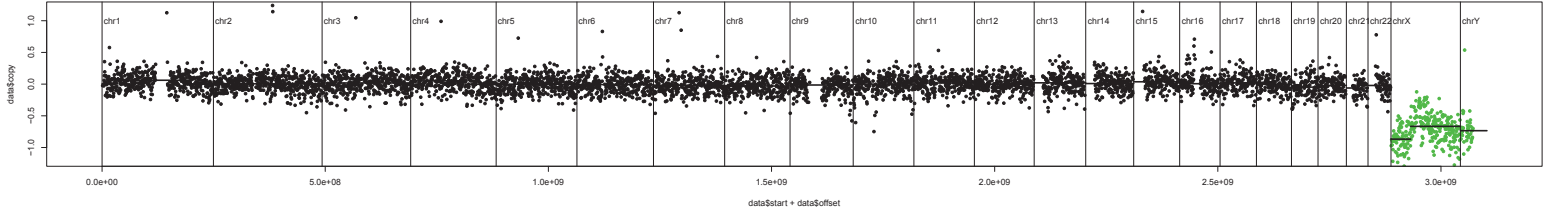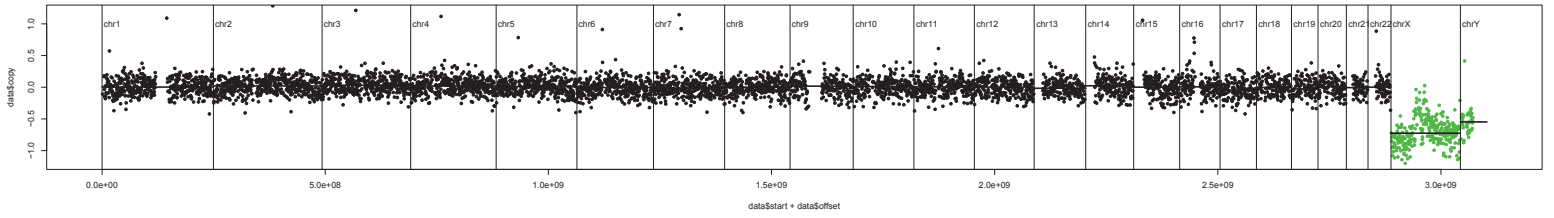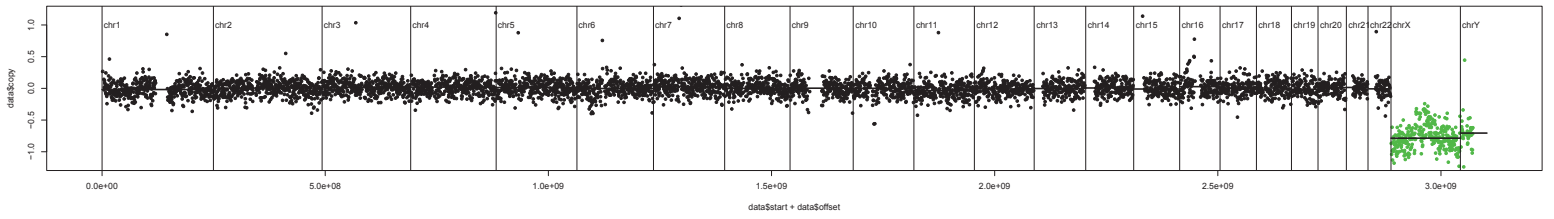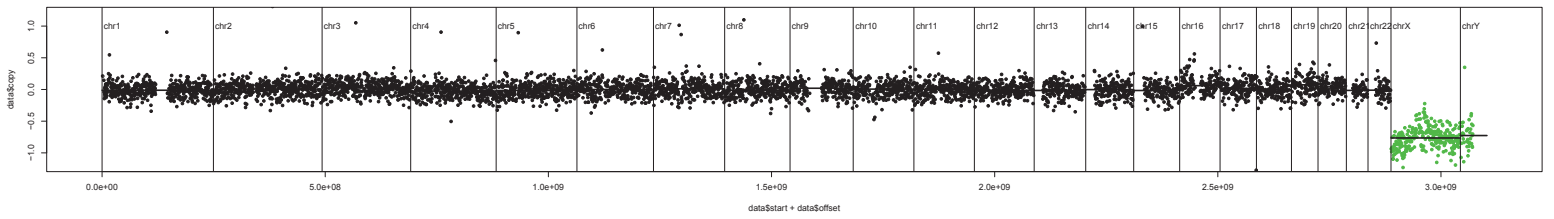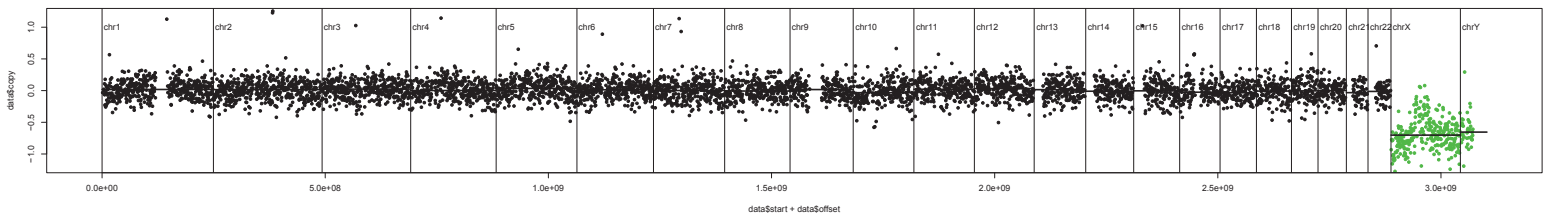

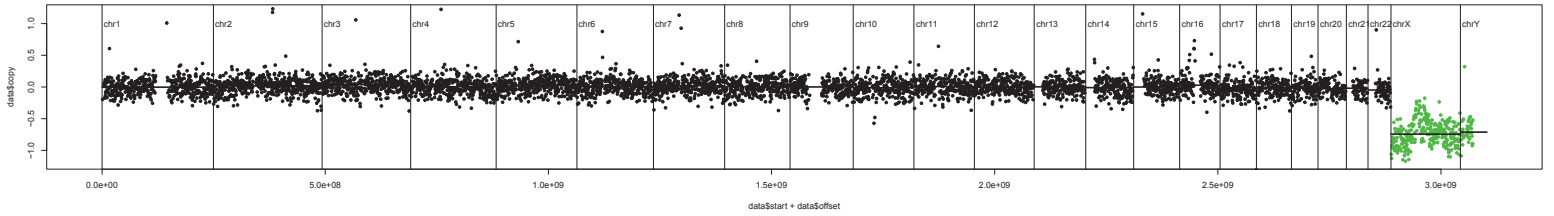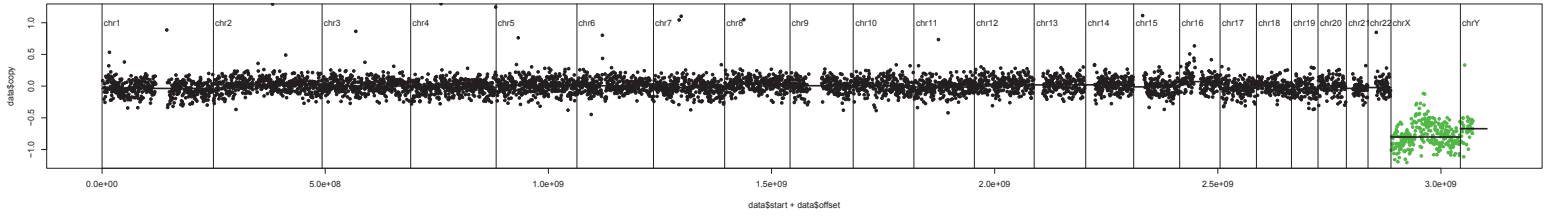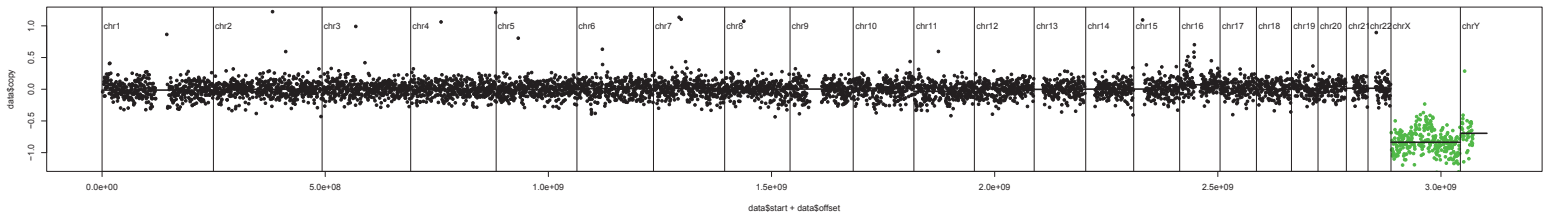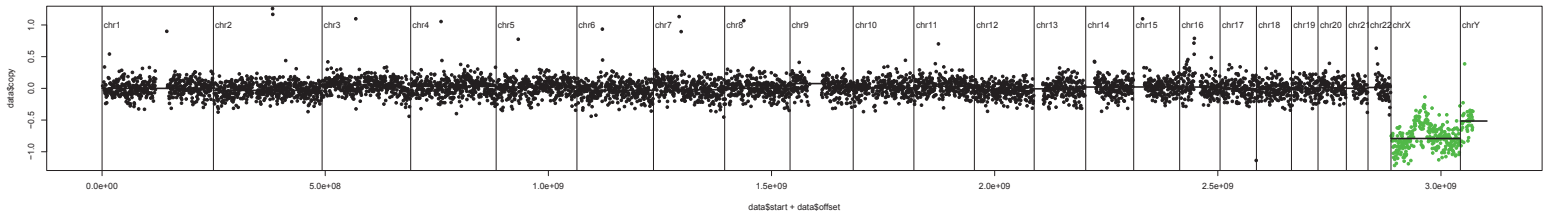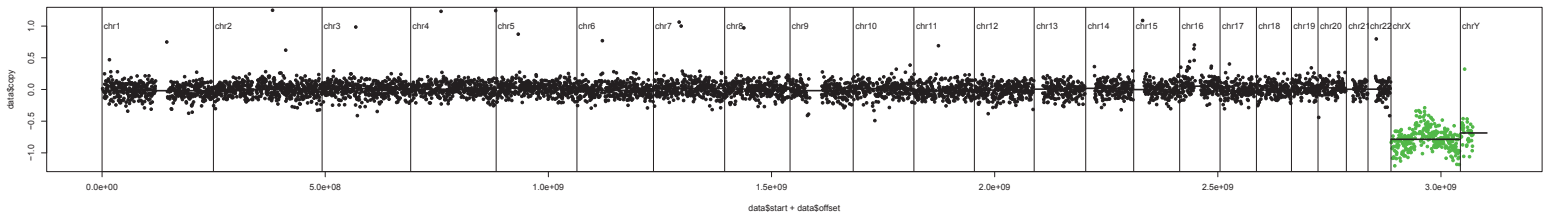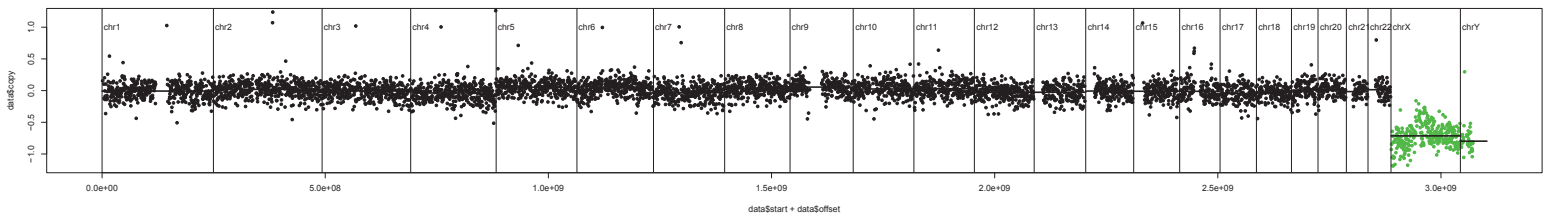

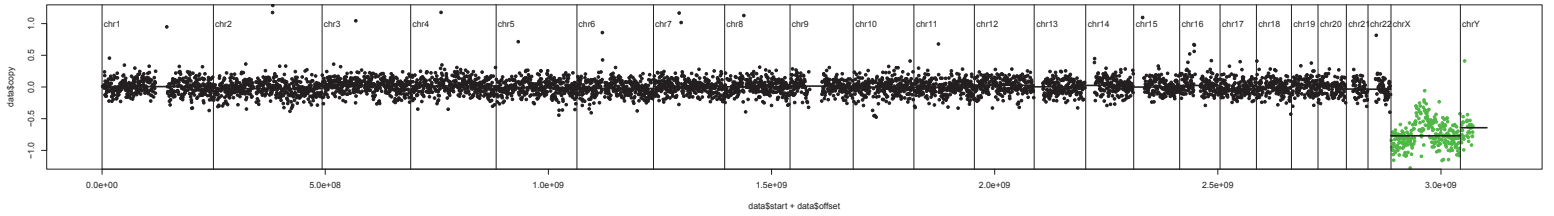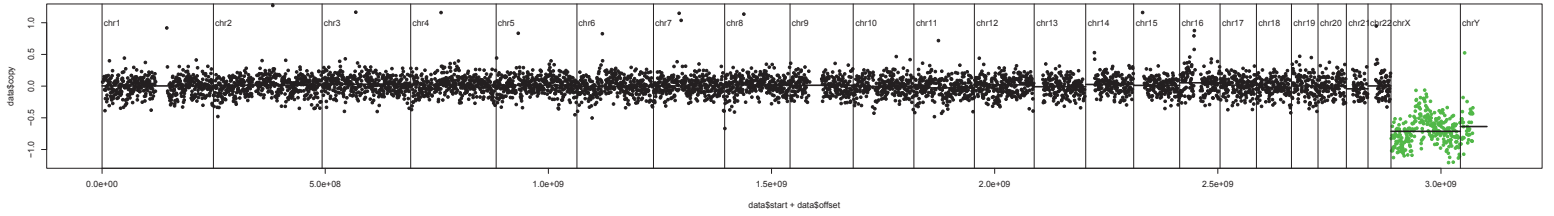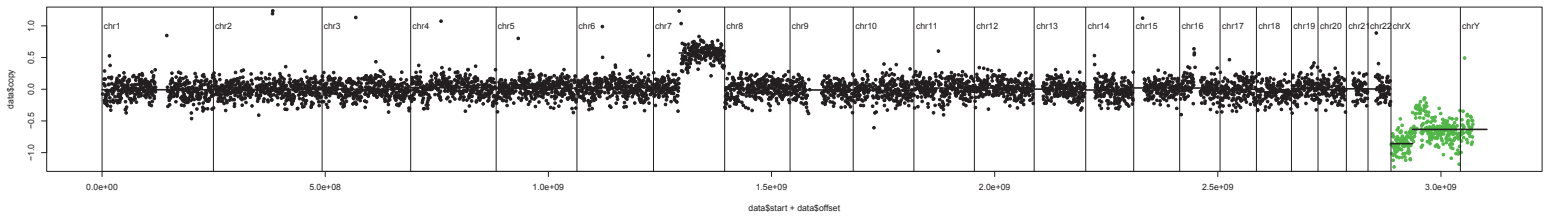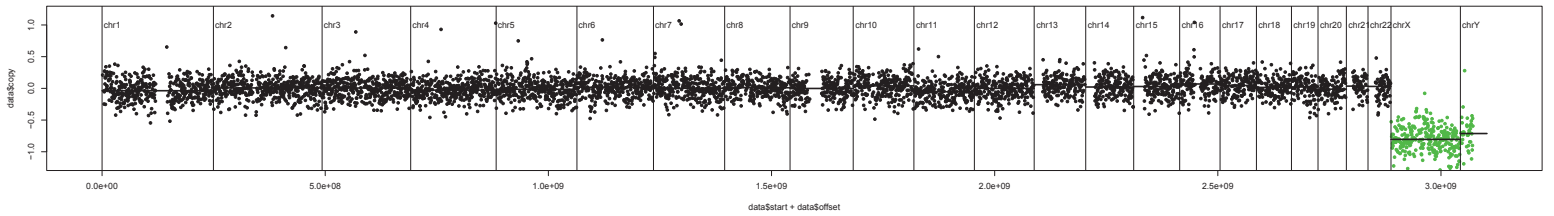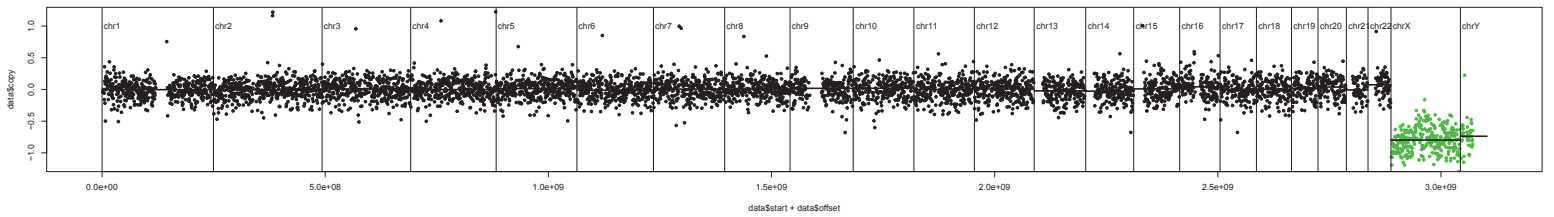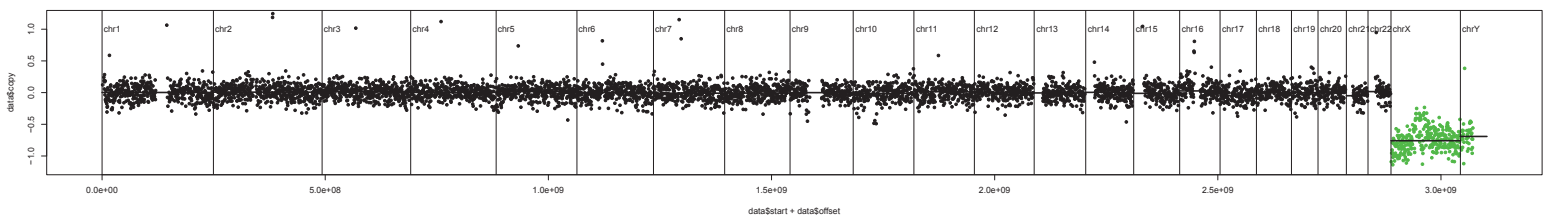

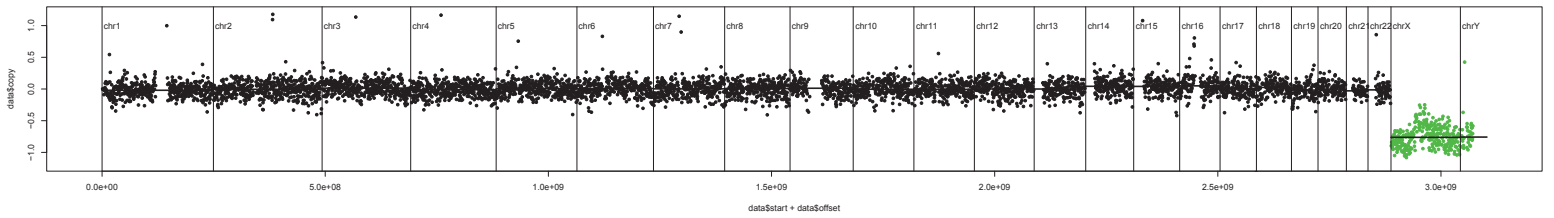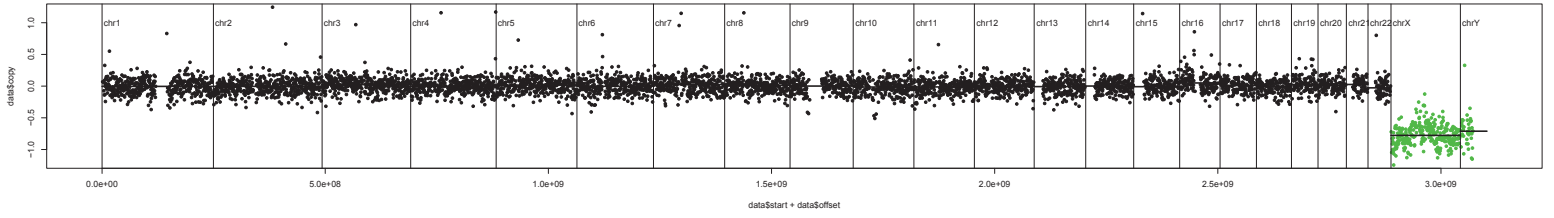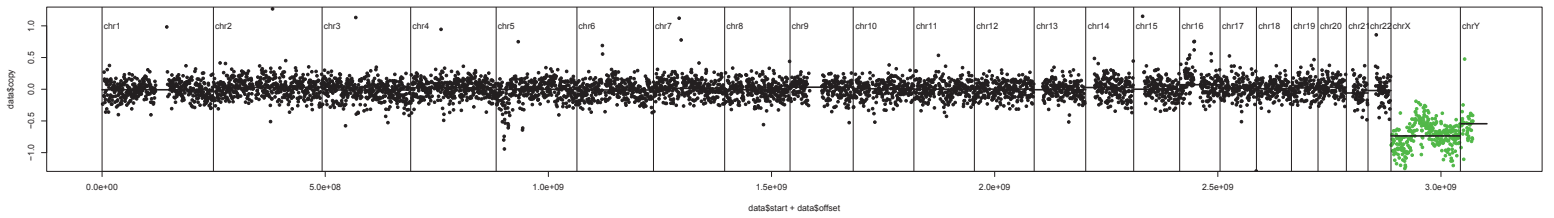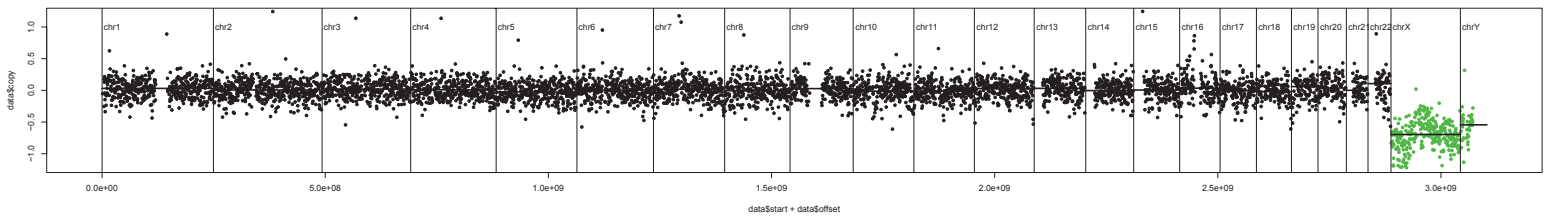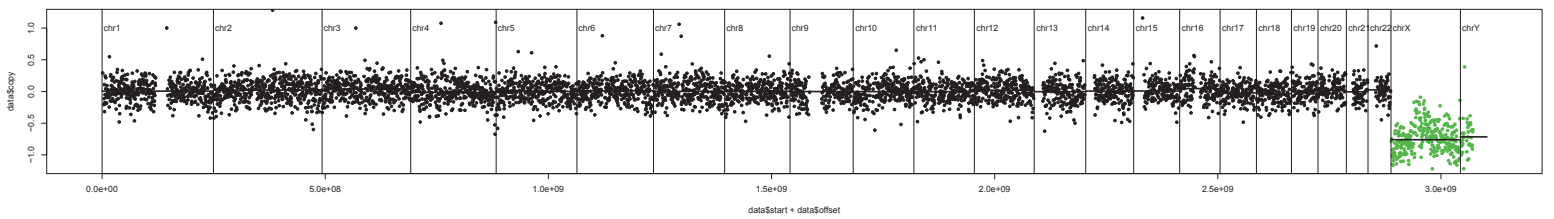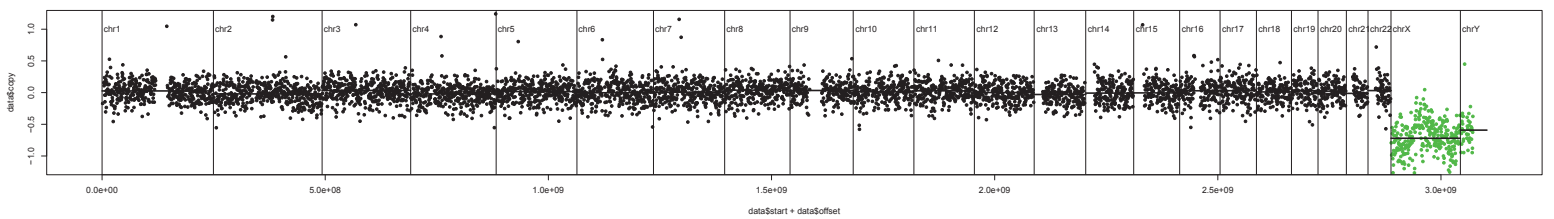

Supplement: pnas.1415287111.sfig02.pdf [file pnas.1415287111.sfig02.pdf]
