# Supplementary material
Source: PubMed Central journal article supplement (PMC4169915)
Supplement: pnas.1415287111.sfig01.pdf [file pnas.1415287111.sfig01.pdf]

# Supplemental Figure 1

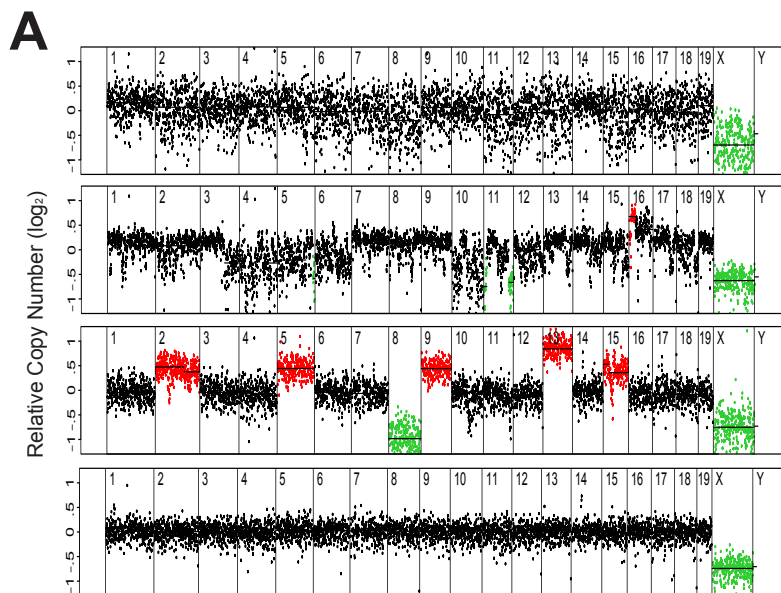

| Variability Score | Excluded? |
|-------------------|-----------|
| 0.45              | Yes       |
| 0.36              | Yes       |
| 0.25              | No        |
| 0.24              | No        |

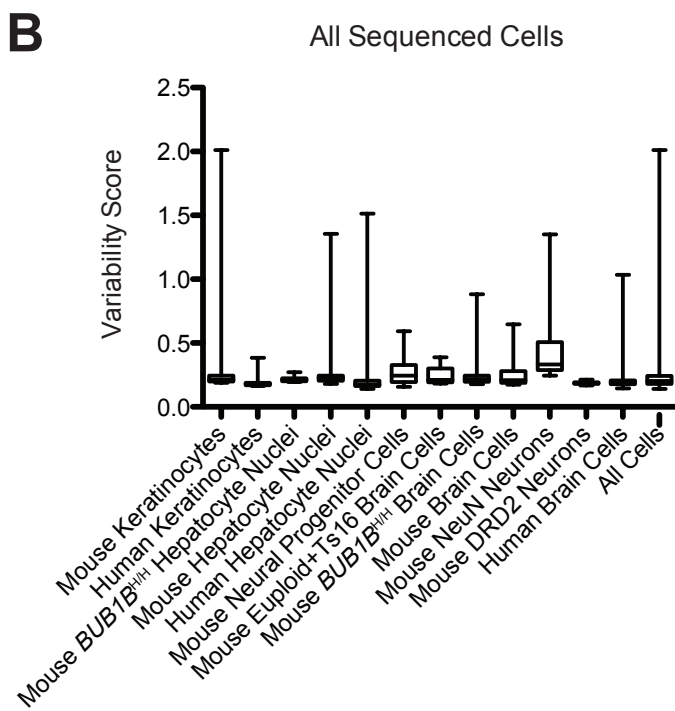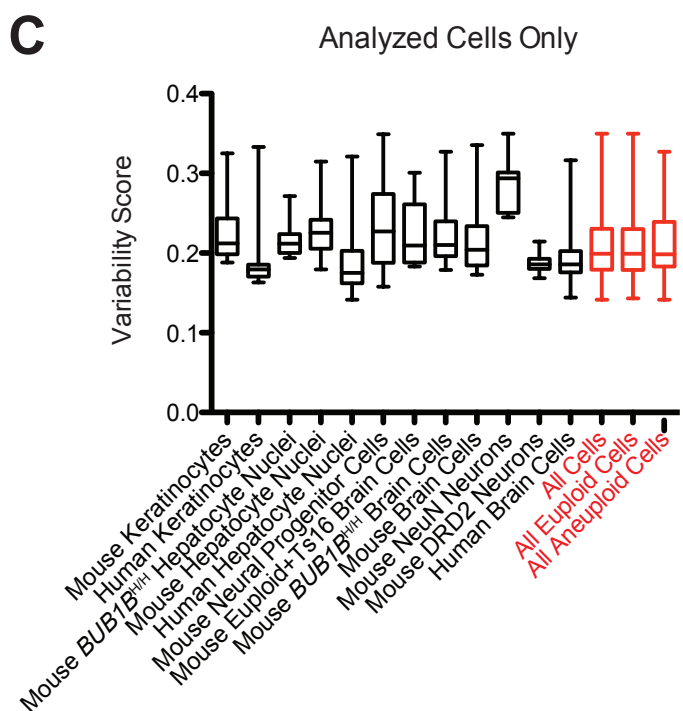

**D**

| Sample                                             | Number Sequenced | Number Excluded | Percent Excluded |
|----------------------------------------------------|------------------|-----------------|------------------|
| Mouse Keratinocytes                                | 38               | 1               | 2.6%             |
| Human Keratinocytes                                | 55               | 2               | 3.6%             |
| Mouse <i>BUB1B<sup>H/H</sup></i> Hepatocyte Nuclei | 16               | 0               | 0%               |
| Mouse Hepatocyte Nuclei                            | 68               | 2               | 2.9%             |
| Human Hepatocyte Nuclei                            | 103              | 3               | 2.9%             |
| Mouse Neural Progenitor Cells                      | 47               | 11              | 23.4%            |
| Mouse Euploid+Ts16 Brain Cells                     | 11               | 2               | 18.1%            |
| Mouse <i>BUB1B<sup>H/H</sup></i> Brain Cells       | 22               | 1               | 4.5%             |
| Mouse Brain Cells                                  | 51               | 8               | 15.7%            |
| Mouse NeuN Neurons                                 | 18               | 9               | 50%              |
| Mouse DRD2 Neurons                                 | 10               | 0               | 0%               |
| Human Brain Cells                                  | 105              | 16              | 15.2%            |
| <b>Total</b>                                       | <b>544</b>       | <b>55</b>       | <b>10.1%</b>     |
