# Supplementary material
Source: PubMed Central journal article supplement (PMC4169915)

# Supplemental Figure 3

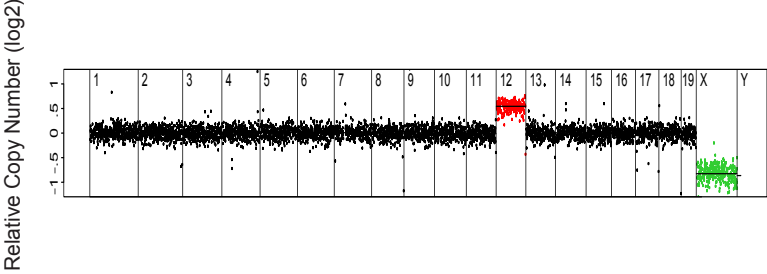

Supplement: pnas.1415287111.sfig03.pdf [file pnas.1415287111.sfig03.pdf]

# Supplemental Figure 4

## A

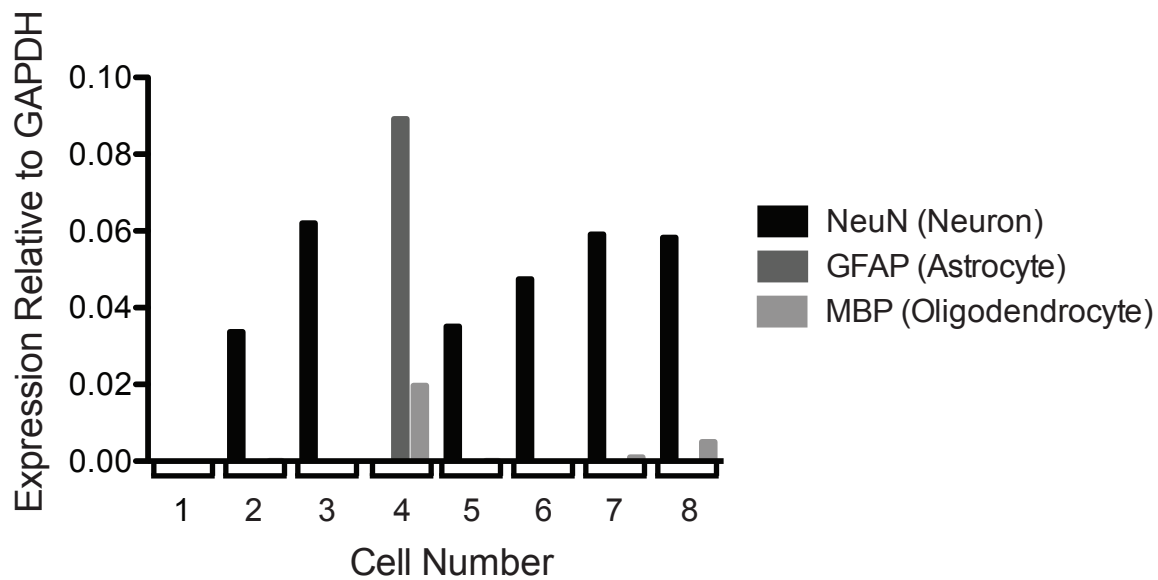

## B

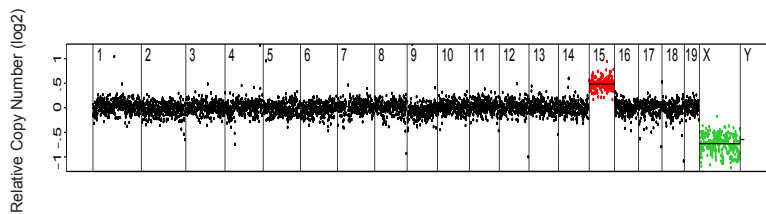

## C

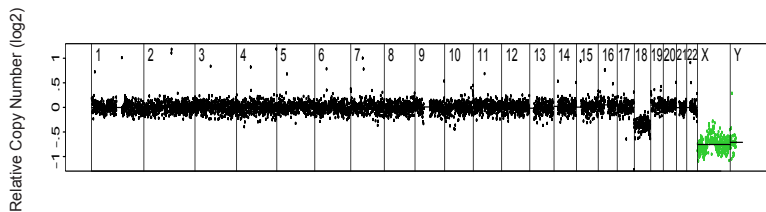

Supplement: pnas.1415287111.sfig04.pdf [file pnas.1415287111.sfig04.pdf]

# Supplemental Figure 5

## A

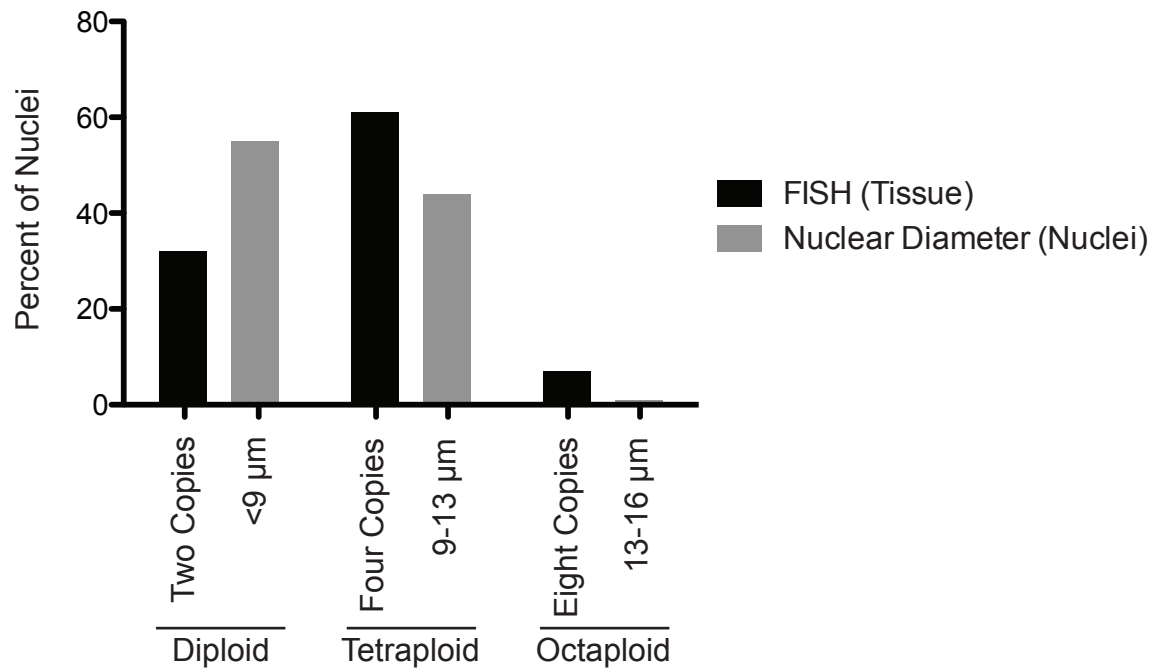

## B

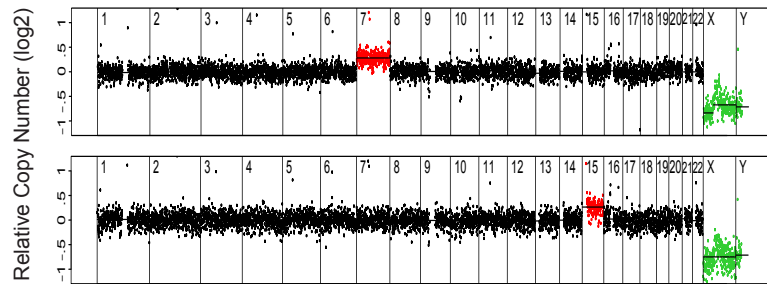

Supplement: pnas.1415287111.sfig05.pdf [file pnas.1415287111.sfig05.pdf]
